# Supplementary material
Source: PubMed Central journal article supplement (PMC8897991)
Supplement: supplemental_tables_bhab213.pdf [file supplemental_tables_bhab213.pdf]

Table S1: Regional CT variance components for all timepoints, based on the trivariate model

|                      | Neonate          |                  |                  | 1-year           |                  |                  | 2-year           |                  |                  |
|----------------------|------------------|------------------|------------------|------------------|------------------|------------------|------------------|------------------|------------------|
|                      | $a^2$            | $c^2$            | $e^2$            | $a^2$            | $c^2$            | $e^2$            | $a^2$            | $c^2$            | $e^2$            |
| Precentral L         | 0.19 (0-0.49)    | 0.21 (0-0.39)    | 0.6 (0.47-0.74)  | 0.32 (0.04-0.61) | 0.26 (0.01-0.49) | 0.43 (0.32-0.56) | 0.24 (0.01-0.58) | 0.33 (0.03-0.55) | 0.44 (0.32-0.58) |
| Precentral R         | 0.4 (0.06-0.61)  | 0.1 (0-0.35)     | 0.5 (0.38-0.67)  | 0.4 (0.06-0.65)  | 0.14 (0-0.42)    | 0.46 (0.33-0.63) | 0.55 (0.17-0.79) | 0.16 (0-0.47)    | 0.29 (0.2-0.44)  |
| Frontal Sup L        | 0.28 (0-0.58)    | 0.22 (0-0.48)    | 0.5 (0.38-0.66)  | 0.5 (0.12-0.7)   | 0.1 (0-0.4)      | 0.39 (0.28-0.55) | 0.42 (0.07-0.71) | 0.22 (0-0.51)    | 0.36 (0.25-0.51) |
| Frontal Sup R        | 0.24 (0.05-0.5)  | 0.35 (0.13-0.51) | 0.41 (0.31-0.52) | 0.5 (0.24-0.68)  | 0.09 (0-0.3)     | 0.41 (0.3-0.55)  | 0.4 (0.06-0.73)  | 0.22 (0-0.5)     | 0.38 (0.26-0.55) |
| Frontal Sup Orb L    | 0.16 (0-0.44)    | 0.22 (0.01-0.4)  | 0.63 (0.49-0.78) | 0.03 (0-0.42)    | 0.26 (0-0.41)    | 0.71 (0.54-0.86) | 0.01 (0-0.35)    | 0.17 (0-0.33)    | 0.83 (0.64-0.98) |
| Frontal Sup Orb R    | 0.23 (0.01-0.48) | 0.19 (0.02-0.37) | 0.58 (0.45-0.73) | 0.2 (0.01-0.47)  | 0.24 (0.03-0.43) | 0.56 (0.43-0.71) | 0.11 (0-0.49)    | 0.28 (0.03-0.46) | 0.61 (0.41-0.77) |
| Frontal Mid L        | 0.28 (0-0.56)    | 0.18 (0-0.43)    | 0.54 (0.4-0.71)  | 0.48 (0.14-0.64) | 0.03 (0-0.28)    | 0.49 (0.35-0.67) | 0.43 (0.1-0.67)  | 0.17 (0-0.43)    | 0.4 (0.28-0.56)  |
| Frontal Mid R        | 0.1 (0-0.4)      | 0.29 (0.03-0.44) | 0.62 (0.5-0.74)  | 0.38 (0.05-0.67) | 0.2 (0-0.47)     | 0.42 (0.31-0.57) | 0.54 (0.1-0.75)  | 0.1 (0-0.46)     | 0.36 (0.24-0.54) |
| Frontal Mid Orb L    | 0.11 (0-0.34)    | 0.08 (0-0.24)    | 0.81 (0.65-0.94) | 0.23 (0-0.45)    | 0.08 (0-0.34)    | 0.69 (0.55-0.84) | 0.03 (0-0.23)    | 0.05 (0-0.21)    | 0.92 (0.76-0.99) |
| Frontal Mid Orb R    | 0.37 (0-0.52)    | 0 (0-0.28)       | 0.63 (0.48-0.84) | 0.29 (0-0.49)    | 0.06 (0-0.37)    | 0.65 (0.5-0.83)  | 0.23 (0-0.41)    | 0.01 (0-0.3)     | 0.76 (0.59-0.96) |
| Frontal Inf Oper L   | 0.13 (0-0.41)    | 0.15 (0-0.34)    | 0.72 (0.58-0.86) | 0.17 (0-0.39)    | 0.03 (0-0.24)    | 0.79 (0.6-0.95)  | 0.28 (0-0.59)    | 0.17 (0-0.5)     | 0.55 (0.39-0.76) |
| Frontal Inf Oper R   | 0.12 (0-0.3)     | 0.03 (0-0.17)    | 0.85 (0.69-0.99) | 0.15 (0-0.47)    | 0.23 (0.01-0.43) | 0.62 (0.45-0.78) | 0.11 (0-0.49)    | 0.34 (0.01-0.55) | 0.56 (0.41-0.73) |
| Frontal Inf Tri L    | 0.39 (0.1-0.55)  | 0.05 (0-0.28)    | 0.56 (0.44-0.7)  | 0.22 (0-0.58)    | 0.25 (0-0.49)    | 0.52 (0.38-0.68) | 0.2 (0-0.58)     | 0.3 (0-0.53)     | 0.5 (0.36-0.66)  |
| Frontal Inf Tri R    | 0.18 (0.01-0.37) | 0.07 (0-0.24)    | 0.74 (0.61-0.89) | 0.34 (0.02-0.5)  | 0.02 (0-0.33)    | 0.64 (0.49-0.8)  | 0.55 (0.18-0.68) | 0.01 (0-0.32)    | 0.44 (0.31-0.62) |
| Frontal Inf Orb L    | 0.08 (0-0.44)    | 0.27 (0-0.43)    | 0.65 (0.5-0.78)  | 0.11 (0-0.52)    | 0.32 (0-0.52)    | 0.56 (0.42-0.72) | 0.18 (0-0.47)    | 0.17 (0-0.43)    | 0.66 (0.49-0.84) |
| Frontal Inf Orb R    | 0.36 (0.01-0.52) | 0.01 (0-0.26)    | 0.63 (0.48-0.82) | 0.17 (0-0.55)    | 0.28 (0-0.49)    | 0.55 (0.41-0.7)  | 0.31 (0-0.64)    | 0.21 (0-0.52)    | 0.47 (0.33-0.66) |
| Rolandic Oper L      | 0.08 (0-0.42)    | 0.25 (0.01-0.38) | 0.67 (0.52-0.79) | 0.31 (0.01-0.62) | 0.22 (0-0.44)    | 0.47 (0.32-0.66) | 0.38 (0.02-0.76) | 0.31 (0-0.59)    | 0.31 (0.21-0.48) |
| Rolandic Oper R      | 0.16 (0-0.37)    | 0.06 (0-0.25)    | 0.78 (0.63-0.93) | 0.43 (0.05-0.61) | 0.04 (0-0.33)    | 0.53 (0.39-0.72) | 0.56 (0.12-0.77) | 0.12 (0-0.48)    | 0.33 (0.22-0.49) |
| Supp Motor Area L    | 0.43 (0.04-0.61) | 0.06 (0-0.33)    | 0.51 (0.38-0.69) | 0.56 (0.24-0.73) | 0.08 (0-0.32)    | 0.36 (0.26-0.51) | 0.61 (0.25-0.72) | 0 (0-0.29)       | 0.39 (0.28-0.54) |
| Supp Motor Area R    | 0.04 (0-0.36)    | 0.32 (0.07-0.44) | 0.64 (0.51-0.75) | 0.55 (0.24-0.7)  | 0.04 (0-0.29)    | 0.41 (0.29-0.56) | 0.53 (0.12-0.69) | 0.03 (0-0.38)    | 0.44 (0.31-0.61) |
| Olfactory L          | 0.14 (0-0.37)    | 0.09 (0-0.28)    | 0.76 (0.61-0.92) | 0.04 (0-0.33)    | 0.23 (0-0.39)    | 0.73 (0.57-0.89) | 0.44 (0.05-0.66) | 0.05 (0-0.32)    | 0.5 (0.33-0.74)  |
| Olfactory R          | 0.1 (0-0.32)     | 0.07 (0-0.23)    | 0.83 (0.66-0.97) | 0.31 (0.03-0.56) | 0.08 (0-0.28)    | 0.61 (0.42-0.8)  | 0.19 (0-0.52)    | 0.23 (0-0.45)    | 0.59 (0.42-0.77) |
| Frontal Sup Medial L | 0.2 (0-0.44)     | 0.07 (0-0.3)     | 0.73 (0.56-0.91) | 0.22 (0.48-0.83) | 0.03 (0-0.21)    | 0.26 (0.17-0.39) | 0.59 (0.13-0.74) | 0.03 (0-0.43)    | 0.37 (0.26-0.55) |
| Frontal Sup Medial R | 0.24 (0-0.43)    | 0.04 (0-0.27)    | 0.72 (0.57-0.88) | 0.49 (0.12-0.69) | 0.07 (0-0.36)    | 0.44 (0.31-0.61) | 0.57 (0.15-0.76) | 0.09 (0-0.41)    | 0.35 (0.23-0.52) |
| Frontal Med Orb L    | 0 (0-0.19)       | 0.04 (0-0.14)    | 0.95 (0.8-1)     | 0.45 (0.13-0.63) | 0 (0-0.21)       | 0.55 (0.37-0.77) | 0.17 (0-0.39)    | 0.1 (0-0.29)     | 0.73 (0.56-0.9)  |
| Frontal Med Orb R    | 0.15 (0-0.38)    | 0.09 (0-0.26)    | 0.76 (0.6-0.91)  | 0.35 (0-0.63)    | 0.14 (0-0.41)    | 0.51 (0.35-0.73) | 0.34 (0.03-0.52) | 0 (0-0.28)       | 0.66 (0.48-0.87) |
| Rectus L             | 0.33 (0.05-0.46) | 0 (0-0.2)        | 0.67 (0.54-0.82) | 0.16 (0-0.44)    | 0.13 (0-0.33)    | 0.71 (0.55-0.89) | 0.28 (0-0.52)    | 0 (0-0.17)       | 0.71 (0.47-0.98) |
| Rectus R             | 0.3 (0-0.46)     | 0 (0-0.25)       | 0.69 (0.54-0.88) | 0.4 (0-0.67)     | 0.15 (0-0.46)    | 0.45 (0.32-0.64) | 0.43 (0-0.7)     | 0.12 (0-0.47)    | 0.45 (0.28-0.72) |
| Insula L             | 0.5 (0.3-0.62)   | 0 (0-0.13)       | 0.5 (0.38-0.65)  | 0.53 (0.11-0.68) | 0.02 (0-0.29)    | 0.45 (0.31-0.66) | 0.1 (0-0.56)     | 0.45 (0.05-0.62) | 0.45 (0.3-0.61)  |
| Insula R             | 0.55 (0.33-0.67) | 0.01 (0-0.15)    | 0.44 (0.32-0.59) | 0.31 (0-0.66)    | 0.25 (0-0.52)    | 0.44 (0.31-0.61) | 0.18 (0-0.57)    | 0.39 (0.05-0.6)  | 0.43 (0.29-0.6)  |
| Cingulum Ant L       | 0.28 (0-0.46)    | 0.05 (0-0.31)    | 0.67 (0.53-0.84) | 0.02 (0-0.32)    | 0.35 (0.1-0.49)  | 0.63 (0.49-0.76) | 0.06 (0-0.46)    | 0.37 (0.05-0.54) | 0.57 (0.4-0.73)  |
| Cingulum Ant R       | 0 (0-0.27)       | 0.21 (0-0.31)    | 0.79 (0.67-0.91) | 0.25 (0-0.62)    | 0.25 (0-0.5)     | 0.5 (0.36-0.67)  | 0.26 (0-0.57)    | 0.15 (0-0.47)    | 0.59 (0.42-0.8)  |
| Cingulum Mid L       | 0.26 (0-0.53)    | 0.18 (0-0.41)    | 0.56 (0.43-0.71) | 0.04 (0-0.42)    | 0.28 (0-0.43)    | 0.68 (0.51-0.82) | 0.2 (0-0.6)      | 0.23 (0-0.5)     | 0.57 (0.39-0.78) |
| Cingulum Mid R       | 0.1 (0-0.47)     | 0.27 (0-0.44)    | 0.63 (0.5-0.76)  | 0.51 (0.17-0.7)  | 0.09 (0-0.32)    | 0.41 (0.28-0.59) | 0.44 (0.15-0.63) | 0.06 (0-0.3)     | 0.5 (0.35-0.69)  |
| Cingulum Post L      | 0.13 (0.01-0.3)  | 0 (0-0.11)       | 0.87 (0.7-0.99)  | 0.4 (0.21-0.53)  | 0 (0-0.16)       | 0.6 (0.47-0.74)  | 0.65 (0.39-0.76) | 0 (0-0.2)        | 0.35 (0.24-0.5)  |
| Cingulum Post R      | 0 (0-0.25)       | 0.15 (0-0.26)    | 0.85 (0.72-0.96) | 0.17 (0.03-0.42) | 0.04 (0-0.15)    | 0.8 (0.57-0.95)  | 0.67 (0.46-0.79) | 0 (0-0.15)       | 0.32 (0.21-0.49) |
| ParaHippocampal L    | 0.48 (0.14-0.61) | 0.01 (0-0.25)    | 0.51 (0.39-0.67) | 0.2 (0-0.38)     | 0 (0-0.23)       | 0.8 (0.62-0.96)  | 0.32 (0-0.51)    | 0 (0-0.32)       | 0.68 (0.49-0.89) |
| ParaHippocampal R    | 0.37 (0.19-0.54) | 0 (0-0.09)       | 0.62 (0.46-0.81) | 0.14 (0-0.38)    | 0.18 (0.02-0.36) | 0.68 (0.52-0.82) | 0.19 (0-0.58)    | 0.43 (0.08-0.63) | 0.38 (0.27-0.53) |
| Calcarine L          | 0.23 (0.01-0.46) | 0.11 (0-0.29)    | 0.66 (0.51-0.82) | 0.47 (0.27-0.62) | 0 (0-0.12)       | 0.53 (0.38-0.71) | 0.59 (0.33-0.73) | 0.02 (0-0.22)    | 0.39 (0.27-0.57) |
| Calcarine R          | 0.21 (0-0.46)    | 0.08 (0-0.32)    | 0.71 (0.54-0.89) | 0.47 (0.14-0.65) | 0.06 (0-0.3)     | 0.47 (0.33-0.66) | 0.02 (0-0.28)    | 0.45 (0.2-0.59)  | 0.53 (0.4-0.68)  |
| Cuneus L             | 0.22 (0-0.38)    | 0.02 (0-0.25)    | 0.76 (0.62-0.92) | 0.11 (0-0.33)    | 0.18 (0.02-0.35) | 0.72 (0.58-0.84) | 0.1 (0-0.43)     | 0.46 (0.15-0.62) | 0.45 (0.33-0.59) |
| Cuneus R             | 0.12 (0-0.35)    | 0.09 (0-0.26)    | 0.79 (0.64-0.92) | 0.11 (0-0.48)    | 0.23 (0-0.4)     | 0.67 (0.48-0.84) | 0.15 (0-0.58)    | 0.31 (0-0.54)    | 0.54 (0.38-0.72) |
| Lingual L            | 0.1 (0-0.37)     | 0.22 (0.03-0.36) | 0.67 (0.54-0.8)  | 0.49 (0.21-0.67) | 0.02 (0-0.16)    | 0.49 (0.32-0.71) | 0.35 (0.08-0.63) | 0.25 (0.01-0.48) | 0.4 (0.28-0.56)  |
| Lingual R            | 0.04 (0-0.44)    | 0.28 (0.01-0.41) | 0.68 (0.5-0.81)  | 0.44 (0.15-0.59) | 0.01 (0-0.22)    | 0.55 (0.41-0.73) | 0.43 (0.07-0.7)  | 0.13 (0-0.41)    | 0.44 (0.29-0.64) |
| Occipital Sup L      | 0.02 (0-0.26)    | 0.21 (0.04-0.33) | 0.77 (0.63-0.89) | 0.04 (0-0.27)    | 0.38 (0.18-0.52) | 0.58 (0.45-0.72) | 0 (0-0.28)       | 0.48 (0.23-0.6)  | 0.52 (0.39-0.67) |
| Occipital Sup R      | 0.07 (0-0.3)     | 0.09 (0-0.24)    | 0.83 (0.68-0.96) | 0.2 (0-0.56)     | 0.33 (0.03-0.54) | 0.46 (0.34-0.61) | 0.54 (0.2-0.82)  | 0.25 (0-0.54)    | 0.21 (0.14-0.33) |
| Occipital Mid L      | 0.08 (0-0.4)     | 0.22 (0-0.37)    | 0.7 (0.55-0.83)  | 0.26 (0-0.59)    | 0.28 (0.01-0.54) | 0.46 (0.34-0.62) | 0.17 (0-0.56)    | 0.31 (0.01-0.55) | 0.52 (0.37-0.7)  |
| Occipital Mid R      | 0.12 (0-0.28)    | 0 (0-0.17)       | 0.88 (0.72-1)    | 0.24 (0-0.58)    | 0.19 (0-0.43)    | 0.57 (0.41-0.75) | 0.37 (0-0.71)    | 0.22 (0-0.56)    | 0.41 (0.28-0.6)  |
| Occipital Inf L      | 0.27 (0-0.45)    | 0 (0-0.17)       | 0.73 (0.55-0.93) | 0.19 (0-0.38)    | 0 (0-0.23)       | 0.81 (0.62-1)    | 0.36 (0.01-0.56) | 0 (0-0.27)       | 0.64 (0.44-0.87) |
| Occipital Inf R      | 0.47 (0.14-0.61) | 0.01 (0-0.24)    | 0.52 (0.39-0.68) | 0.02 (0-0.32)    | 0.23 (0-0.37)    | 0.75 (0.6-0.89)  | 0.01 (0-0.33)    | 0.22 (0-0.38)    | 0.77 (0.61-0.93) |
| Fusiform L           | 0.29 (0.02-0.5)  | 0.08 (0-0.29)    | 0.63 (0.49-0.79) | 0.35 (0.02-0.57) | 0.1 (0-0.37)     | 0.55 (0.42-0.71) | 0.51 (0.05-0.67) | 0.02 (0-0.38)    | 0.47 (0.33-0.66) |
| Fusiform R           | 0.26 (0-0.59)    | 0.23 (0-0.45)    | 0.52 (0.38-0.68) | 0.3 (0-0.49)     | 0 (0-0.25)       | 0.7 (0.51-0.91)  | 0.47 (0.06-0.65) | 0.02 (0-0.3)     | 0.51 (0.35-0.73) |
| Postcentral L        | 0.49 (0.13-0.6)  | 0 (0-0.27)       | 0.51 (0.4-0.66)  | 0.4 (0.06-0.65)  | 0.22 (0.02-0.49) | 0.38 (0.28-0.52) | 0.14 (0-0.44)    | 0.5 (0.21-0.68)  | 0.35 (0.26-0.48) |
| Postcentral R        | 0.45 (0.13-0.58) | 0.02 (0-0.26)    | 0.53 (0.41-0.68) | 0.16 (0.01-0.49) | 0.4 (0.1-0.59)   | 0.43 (0.33-0.55) | 0.59 (0.26-0.81) | 0.16 (0-0.45)    | 0.24 (0.16-0.36) |
| Parietal Sup L       | 0.07 (0-0.37)    | 0.35 (0.1-0.49)  | 0.58 (0.46-0.69) | 0.34 (0-0.69)    | 0.3 (0-0.57)     | 0.36 (0.26-0.51) | 0.38 (0.01-0.74) | 0.26 (0-0.56)    | 0.36 (0.24-0.53) |
| Parietal Sup R       | 0 (0-0.28)       | 0.2 (0.01-0.31)  | 0.8 (0.66-0.91)  | 0.45 (0.1-0.69)  | 0.23 (0.03-0.5)  | 0.32 (0.23-0.46) | 0.17 (0-0.51)    | 0.53 (0.22-0.71) | 0.3 (0.21-0.43)  |
| Parietal Inf L       | 0.29 (0.01-0.46) | 0.03 (0-0.27)    | 0.68 (0.54-0.83) | 0.33 (0-0.59)    | 0.13 (0-0.46)    | 0.54 (0.4-0.72)  | 0.25 (0-0.62)    | 0.23 (0-0.49)    | 0.52 (0.37-0.7)  |
| Parietal Inf R       | 0.17 (0-0.45)    | 0.09 (0-0.3)     | 0.74 (0.55-0.92) | 0.29 (0.03-0.45) | 0 (0-0.21)       | 0.71 (0.54-0.89) | 0.57 (0.26-0.72) | 0 (0-0.19)       | 0.43 (0.28-0.64) |
| SupraMarginal L      | 0.13 (0-0.38)    | 0.08 (0-0.23)    | 0.8 (0.62-0.95)  | 0.37 (0.07-0.6)  | 0.1 (0-0.34)     | 0.53 (0.39-0.7)  | 0.44 (0.11-0.74) | 0.19 (0-0.47)    | 0.37 (0.25-0.52) |
| SupraMarginal R      | 0.22 (0-0.43)    | 0.07 (0-0.26)    | 0.71 (0.55-0.88) | 0.29 (0.02-0.55) | 0.13 (0-0.36)    | 0.58 (0.42-0.75) | 0.31 (0.04-0.62) | 0.27 (0.01-0.51) | 0.42 (0.31-0.56) |
| Angular L            | 0 (0-0.16)       | 0.01 (0-0.09)    | 0.98 (0.84-1)    | 0.05 (0-0.46)    | 0.33 (0.01-0.49) | 0.62 (0.46-0.76) | 0.01 (0-0.43)    | 0.45 (0.1-0.57)  | 0.55 (0.39-0.69) |
| Angular R            | 0.26 (0.01-0.44) | 0.05 (0-0.26)    | 0.69 (0.56-0.84) | 0.44 (0.04-0.65) | 0.1 (0-0.43)     | 0.46 (0.34-0.61) | 0.34 (0.02-0.65) | 0.19 (0-0.48)    | 0.47 (0.34-0.63) |
| Precuneus L          | 0.39 (0.11-0.53) | 0.01 (0-0.21)    | 0.6 (0.47-0.75)  | 0.31 (0.06-0.66) | 0.3 (0-0.52)     | 0.39 (0.28-0.52) | 0.57 (0.19-0.79) | 0.15 (0-0.47)    | 0.28 (0.19-0.42) |
| Precuneus R          | 0.13 (0-0.39)    | 0.08 (0-0.26)    | 0.79 (0.61-0.96) | 0.61 (0.28-0.72) | 0.01 (0-0.27)    | 0.39 (0.28-0.54) | 0.56 (0.16-0.79) | 0.14 (0-0.45)    | 0.3 (0.2-0.46)   |
| Paracentral Lobule L | 0.4 (0.09-0.56)  | 0.03 (0-0.27)    | 0.56 (0.44-0.72) | 0.52 (0.16-0.69) | 0.05 (0-0.33)    | 0.43 (0.31-0.59) | 0.48 (0.12-0.67) | 0.04 (0-0.31)    | 0.48 (0.33-0.68) |
| Paracentral Lobule R | 0.18 (0-0.37)    | 0.02 (0-0.19)    | 0.8 (0.63-0.97)  | 0.14 (0-0.47)    | 0.25 (0-0.42)    | 0.61 (0.47-0.76) | 0.36 (0-0.59)    | 0.07 (0-0.38)    | 0.57 (0.39-0.79) |
| Heschl L             | 0.18 (0.03-0.32) | 0 (0-0.12)       | 0.82 (0.68-0.94) | 0.36 (0.08-0.53) | 0.03 (0-0.23)    | 0.61 (0.46-0.78) | 0.27 (0-0.67)    | 0.21 (0-0.5)     | 0.52 (0.33-0.77) |
| Heschl R             | 0.43 (0.15-0.57) | 0 (0-0.18)       | 0.56 (0.42-0.73) | 0.01 (0-0.25)    | 0.11 (0-0.27)    | 0.87 (0.73-1)    | 0.43 (0-0.63)    | 0 (0-0.25)       | 0.57 (0.37-0.84) |
| Temporal Sup L       | 0.33 (0-0.5)     | 0.01 (0-0.23)    | 0.66 (0.5-0.85)  | 0.38 (0.1-0.63)  | 0.13 (0-0.38)    | 0.49 (0.37-0.63) | 0.6 (0.24-0.81)  | 0.13 (0-0.43)    | 0.27 (0.18-0.41) |
| Temporal Sup R       | 0.36 (0.14-0.52) | 0 (0-0.11)       | 0.64 (0.48-0.83) | 0.14 (0-0.46)    | 0.26 (0.02-0.46) | 0.6 (0.46-0.75)  | 0.15 (0-0.53)    | 0.5 (0.16-0.69)  | 0.36 (0.24-0.51) |
| Temporal Pole Sup L  | 0.15 (0-0.4)     | 0.09 (0-0.29)    | 0.76 (0.59-0.92) | 0.48 (0.22-0.66) | 0.01 (0-0.18)    | 0.51 (0.34-0.72) | 0.53 (0.2-0.76)  | 0.12 (0-0.39)    | 0.35 (0.24-0.52) |
| Temporal Pole Sup R  | 0.15 (0-0.43)    | 0.11 (0-0.29)    | 0.74 (0.56-0.89) | 0.41 (0.13-0.58) | 0 (0-0           |                  |                  |                  |                  |

Table S2: Regional SA variance components for all timepoints, based on the trivariate model

|                      | Neonate          |                  |                  | 1-year           |                  |                  | 2-year           |                  |                  |
|----------------------|------------------|------------------|------------------|------------------|------------------|------------------|------------------|------------------|------------------|
|                      | $a^2$            | $c^2$            | $e^2$            | $a^2$            | $c^2$            | $e^2$            | $a^2$            | $c^2$            | $e^2$            |
| Precentral L         | 0.54 (0.17-0.7)  | 0.06 (0-0.34)    | 0.4 (0.3-0.54)   | 0.45 (0.18-0.61) | 0 (0-0.21)       | 0.54 (0.39-0.71) | 0.55 (0.21-0.68) | 0 (0-0.28)       | 0.45 (0.32-0.62) |
| Precentral R         | 0.58 (0.35-0.73) | 0.08 (0-0.26)    | 0.34 (0.25-0.45) | 0.45 (0.23-0.62) | 0.03 (0-0.2)     | 0.52 (0.37-0.68) | 0.34 (0.13-0.53) | 0.09 (0-0.27)    | 0.57 (0.44-0.73) |
| Frontal Sup L        | 0.01 (0-0.29)    | 0.38 (0.15-0.48) | 0.61 (0.49-0.71) | 0.34 (0-0.6)     | 0.19 (0.01-0.43) | 0.47 (0.34-0.64) | 0.3 (0.01-0.57)  | 0.26 (0.04-0.49) | 0.44 (0.33-0.59) |
| Frontal Sup R        | 0.17 (0-0.47)    | 0.4 (0.14-0.58)  | 0.43 (0.33-0.56) | 0.17 (0-0.46)    | 0.2 (0.01-0.41)  | 0.63 (0.48-0.78) | 0.24 (0-0.64)    | 0.29 (0-0.55)    | 0.47 (0.33-0.64) |
| Frontal Sup Orb L    | 0.43 (0.30-0.59) | 0.02 (0-0.3)     | 0.55 (0.41-0.74) | 0.5 (0.17-0.7)   | 0.1 (0-0.35)     | 0.39 (0.28-0.55) | 0.49 (0.17-0.64) | 0 (0-0.25)       | 0.5 (0.36-0.68)  |
| Frontal Sup Orb R    | 0.17 (0.01-0.42) | 0.31 (0.11-0.46) | 0.52 (0.41-0.64) | 0.66 (0.34-0.76) | 0 (0-0.24)       | 0.34 (0.24-0.48) | 0.44 (0.18-0.58) | 0 (0-0.2)        | 0.56 (0.42-0.72) |
| Frontal Mid L        | 0.49 (0.23-0.7)  | 0.15 (0-0.35)    | 0.36 (0.27-0.48) | 0.64 (0.41-0.74) | 0.02 (0-0.21)    | 0.34 (0.25-0.45) | 0.67 (0.41-0.81) | 0.07 (0-0.29)    | 0.26 (0.18-0.36) |
| Frontal Mid R        | 0.52 (0.29-0.76) | 0.22 (0-0.42)    | 0.25 (0.19-0.34) | 0.49 (0.23-0.66) | 0.06 (0-0.27)    | 0.44 (0.32-0.59) | 0.54 (0.25-0.7)  | 0.06 (0-0.29)    | 0.4 (0.29-0.54)  |
| Frontal Mid Orb L    | 0.53 (0.25-0.64) | 0 (0-0.2)        | 0.47 (0.36-0.61) | 0.39 (0.07-0.6)  | 0.09 (0-0.33)    | 0.52 (0.39-0.69) | 0.4 (0.08-0.57)  | 0.01 (0-0.23)    | 0.59 (0.43-0.79) |
| Frontal Mid Orb R    | 0.57 (0.30-0.71) | 0.05 (0-0.27)    | 0.38 (0.28-0.5)  | 0.61 (0.32-0.71) | 0 (0-0.23)       | 0.39 (0.29-0.52) | 0.62 (0.3-0.74)  | 0.02 (0-0.28)    | 0.36 (0.26-0.49) |
| Frontal Inf Oper L   | 0.29 (0-0.49)    | 0.06 (0-0.28)    | 0.65 (0.51-0.82) | 0.29 (0-0.55)    | 0.12 (0-0.34)    | 0.59 (0.43-0.78) | 0.27 (0-0.5)     | 0.11 (0-0.35)    | 0.63 (0.48-0.79) |
| Frontal Inf Oper R   | 0.34 (0.06-0.51) | 0.04 (0-0.23)    | 0.62 (0.48-0.78) | 0.28 (0.04-0.45) | 0.01 (0-0.19)    | 0.7 (0.54-0.88)  | 0.28 (0.02-0.45) | 0.01 (0-0.21)    | 0.71 (0.55-0.89) |
| Frontal Inf Tri L    | 0.33 (0.04-0.49) | 0.03 (0-0.22)    | 0.64 (0.5-0.8)   | 0.09 (0-0.38)    | 0.13 (0-0.28)    | 0.78 (0.62-0.92) | 0.09 (0-0.37)    | 0.13 (0-0.29)    | 0.78 (0.62-0.92) |
| Frontal Inf Tri R    | 0.44 (0.19-0.58) | 0 (0-0.16)       | 0.56 (0.42-0.72) | 0.32 (0.04-0.58) | 0.17 (0-0.41)    | 0.51 (0.38-0.65) | 0.32 (0.02-0.52) | 0.07 (0-0.33)    | 0.62 (0.47-0.79) |
| Frontal Inf Orb L    | 0.72 (0.57-0.79) | 0 (0-0.13)       | 0.28 (0.21-0.37) | 0.29 (0.1-0.58)  | 0.22 (0-0.41)    | 0.49 (0.37-0.61) | 0.62 (0.16-0.7)  | 0.21 (0-0.44)    | 0.37 (0.26-0.5)  |
| Frontal Inf Orb R    | 0.53 (0.23-0.71) | 0.09 (0-0.33)    | 0.38 (0.28-0.5)  | 0.54 (0.24-0.68) | 0.05 (0-0.3)     | 0.41 (0.32-0.53) | 0.67 (0.35-0.78) | 0.01 (0-0.26)    | 0.32 (0.22-0.46) |
| Rolandic Oper L      | 0.61 (0.41-0.71) | 0.01 (0-0.16)    | 0.38 (0.29-0.5)  | 0.51 (0.25-0.67) | 0.03 (0-0.22)    | 0.46 (0.32-0.63) | 0.55 (0.29-0.73) | 0.09 (0-0.32)    | 0.36 (0.26-0.49) |
| Rolandic Oper R      | 0.43 (0.1-0.66)  | 0.14 (0-0.38)    | 0.44 (0.33-0.57) | 0.33 (0.04-0.57) | 0.12 (0-0.38)    | 0.55 (0.42-0.69) | 0.3 (0.02-0.56)  | 0.13 (0-0.39)    | 0.57 (0.43-0.71) |
| Supp Motor Area L    | 0.25 (0-0.57)    | 0.29 (0.03-0.49) | 0.47 (0.35-0.6)  | 0.44 (0.07-0.66) | 0.12 (0-0.39)    | 0.44 (0.3-0.62)  | 0.42 (0.07-0.73) | 0.27 (0.01-0.55) | 0.3 (0.21-0.45)  |
| Supp Motor Area R    | 0.3 (0-0.61)     | 0.31 (0.05-0.54) | 0.39 (0.29-0.54) | 0.22 (0-0.56)    | 0.3 (0.04-0.54)  | 0.48 (0.33-0.66) | 0.14 (0-0.46)    | 0.43 (0.14-0.61) | 0.43 (0.31-0.57) |
| Olfactory L          | 0.34 (0.12-0.49) | 0 (0-0.15)       | 0.66 (0.51-0.83) | 0.18 (0-0.53)    | 0.19 (0-0.41)    | 0.63 (0.44-0.82) | 0.4 (0.09-0.65)  | 0.13 (0-0.38)    | 0.47 (0.33-0.65) |
| Olfactory R          | 0.4 (0.15-0.54)  | 0.01 (0-0.18)    | 0.59 (0.45-0.75) | 0.22 (0-0.59)    | 0.32 (0.01-0.54) | 0.46 (0.33-0.61) | 0.44 (0.01-0.63) | 0.05 (0-0.39)    | 0.51 (0.35-0.72) |
| Frontal Sup Medial L | 0.43 (0.21-0.59) | 0.06 (0-0.23)    | 0.51 (0.39-0.65) | 0.33 (0.01-0.83) | 0.04 (0-0.22)    | 0.23 (0.16-0.34) | 0.62 (0.41-0.74) | 0.01 (0-0.2)     | 0.37 (0.26-0.51) |
| Frontal Sup Medial R | 0.62 (0.32-0.75) | 0.05 (0-0.3)     | 0.33 (0.25-0.44) | 0.66 (0.33-0.77) | 0.02 (0-0.32)    | 0.32 (0.23-0.44) | 0.7 (0.37-0.79)  | 0 (0-0.3)        | 0.29 (0.21-0.42) |
| Frontal Med Orb L    | 0.14 (0-0.41)    | 0.11 (0-0.29)    | 0.75 (0.58-0.89) | 0.36 (0-0.64)    | 0.15 (0-0.46)    | 0.49 (0.36-0.67) | 0.25 (0-0.59)    | 0.2 (0-0.48)     | 0.55 (0.41-0.71) |
| Frontal Med Orb R    | 0.42 (0.09-0.69) | 0.18 (0-0.42)    | 0.4 (0.3-0.54)   | 0.44 (0.11-0.65) | 0.09 (0-0.38)    | 0.47 (0.35-0.62) | 0.55 (0.18-0.73) | 0.05 (0-0.34)    | 0.4 (0.27-0.56)  |
| Rectus L             | 0.37 (0.09-0.54) | 0.05 (0-0.24)    | 0.58 (0.44-0.75) | 0.13 (0-0.48)    | 0.22 (0-0.43)    | 0.65 (0.47-0.83) | 0.14 (0-0.62)    | 0.38 (0-0.58)    | 0.48 (0.33-0.64) |
| Rectus R             | 0.5 (0.12-0.67)  | 0.06 (0-0.34)    | 0.44 (0.33-0.6)  | 0.46 (0.17-0.62) | 0 (0-0.18)       | 0.54 (0.38-0.74) | 0.43 (0.17-0.58) | 0 (0-0.2)        | 0.57 (0.42-0.74) |
| Insula L             | 0.53 (0.27-0.75) | 0.17 (0-0.38)    | 0.3 (0.22-0.4)   | 0.68 (0.47-0.8)  | 0.05 (0-0.21)    | 0.27 (0.19-0.39) | 0.72 (0.45-0.86) | 0.07 (0-0.33)    | 0.2 (0.14-0.29)  |
| Insula R             | 0.36 (0.06-0.64) | 0.26 (0.03-0.48) | 0.38 (0.28-0.51) | 0.64 (0.32-0.75) | 0.03 (0-0.29)    | 0.33 (0.24-0.45) | 0.5 (0.18-0.77)  | 0.23 (0-0.5)     | 0.27 (0.19-0.39) |
| Cingulum Ant L       | 0.49 (0.23-0.63) | 0.01 (0-0.2)     | 0.49 (0.37-0.64) | 0.5 (0.22-0.7)   | 0.1 (0-0.36)     | 0.39 (0.29-0.52) | 0.64 (0.29-0.75) | 0.01 (0-0.32)    | 0.35 (0.25-0.49) |
| Cingulum Ant R       | 0.72 (0.54-0.81) | 0.02 (0-0.15)    | 0.26 (0.19-0.37) | 0.5 (0.29-0.71)  | 0.24 (0.05-0.42) | 0.26 (0.19-0.36) | 0.56 (0.33-0.75) | 0.12 (0-0.3)     | 0.32 (0.22-0.46) |
| Cingulum Mid L       | 0.57 (0.27-0.7)  | 0.03 (0-0.24)    | 0.4 (0.3-0.54)   | 0.53 (0.21-0.68) | 0 (0-0.19)       | 0.46 (0.32-0.66) | 0.45 (0.2-0.62)  | 0 (0-0.16)       | 0.55 (0.38-0.74) |
| Cingulum Mid R       | 0.65 (0.41-0.78) | 0.06 (0-0.24)    | 0.29 (0.21-0.4)  | 0.67 (0.43-0.78) | 0.02 (0-0.17)    | 0.31 (0.21-0.46) | 0.55 (0.33-0.7)  | 0.09 (0-0.28)    | 0.36 (0.26-0.49) |
| Cingulum Post L      | 0.43 (0.22-0.57) | 0.01 (0-0.13)    | 0.57 (0.43-0.72) | 0.39 (0.16-0.56) | 0.05 (0-0.23)    | 0.56 (0.43-0.72) | 0.3 (0.07-0.55)  | 0.17 (0-0.39)    | 0.53 (0.41-0.67) |
| Cingulum Post R      | 0.34 (0.01-0.5)  | 0.02 (0-0.27)    | 0.64 (0.5-0.82)  | 0.46 (0.14-0.61) | 0 (0-0.21)       | 0.54 (0.39-0.74) | 0.49 (0.11-0.68) | 0.03 (0-0.3)     | 0.48 (0.32-0.7)  |
| ParaHippocampal L    | 0.33 (0.14-0.48) | 0 (0-0.12)       | 0.67 (0.52-0.82) | 0.29 (0.01-0.49) | 0 (0-0.18)       | 0.71 (0.51-0.93) | 0.38 (0.03-0.57) | 0 (0-0.27)       | 0.62 (0.43-0.84) |
| ParaHippocampal R    | 0.33 (0.01-0.59) | 0.16 (0-0.4)     | 0.51 (0.39-0.66) | 0.2 (0-0.48)     | 0.14 (0-0.34)    | 0.66 (0.48-0.81) | 0.54 (0.2-0.72)  | 0.01 (0-0.2)     | 0.45 (0.28-0.7)  |
| Calcarine L          | 0.43 (0.18-0.65) | 0.17 (0-0.37)    | 0.4 (0.31-0.52)  | 0.63 (0.35-0.73) | 0 (0-0.22)       | 0.37 (0.27-0.51) | 0.64 (0.26-0.76) | 0.01 (0-0.33)    | 0.34 (0.24-0.49) |
| Calcarine R          | 0.52 (0.28-0.67) | 0.05 (0-0.23)    | 0.43 (0.32-0.56) | 0.8 (0.66-0.87)  | 0 (0-0.1)        | 0.2 (0.13-0.31)  | 0.37 (0.16-0.64) | 0.15 (0-0.33)    | 0.49 (0.34-0.65) |
| Cuneus L             | 0.29 (0.01-0.49) | 0.05 (0-0.29)    | 0.66 (0.51-0.82) | 0.42 (0.13-0.57) | 0 (0-0.2)        | 0.58 (0.43-0.75) | 0.38 (0.08-0.56) | 0.01 (0-0.25)    | 0.62 (0.44-0.8)  |
| Cuneus R             | 0.42 (0.13-0.57) | 0.02 (0-0.22)    | 0.57 (0.43-0.74) | 0.5 (0.19-0.67)  | 0 (0-0.17)       | 0.5 (0.33-0.74)  | 0.31 (0.11-0.49) | 0.05 (0-0.23)    | 0.64 (0.49-0.81) |
| Lingual L            | 0.51 (0.11-0.71) | 0.08 (0-0.35)    | 0.41 (0.29-0.59) | 0.61 (0.32-0.74) | 0.04 (0-0.28)    | 0.36 (0.26-0.48) | 0.56 (0.28-0.72) | 0.06 (0-0.3)     | 0.38 (0.28-0.52) |
| Lingual R            | 0.23 (0.06-0.51) | 0.39 (0.15-0.55) | 0.38 (0.29-0.47) | 0.56 (0.31-0.75) | 0.16 (0.01-0.36) | 0.28 (0.19-0.41) | 0.71 (0.49-0.83) | 0.06 (0-0.21)    | 0.23 (0.14-0.39) |
| Occipital Sup L      | 0.48 (0.2-0.63)  | 0.03 (0-0.24)    | 0.49 (0.37-0.63) | 0.5 (0.2-0.66)   | 0.04 (0-0.29)    | 0.46 (0.34-0.61) | 0.58 (0.29-0.72) | 0.02 (0-0.26)    | 0.4 (0.28-0.55)  |
| Occipital Sup R      | 0.47 (0.1-0.62)  | 0.02 (0-0.25)    | 0.51 (0.38-0.69) | 0.29 (0-0.69)    | 0.07 (0-0.34)    | 0.64 (0.5-0.79)  | 0.44 (0.04-0.61) | 0.01 (0-0.35)    | 0.55 (0.39-0.74) |
| Occipital Mid L      | 0.43 (0.12-0.64) | 0.11 (0-0.36)    | 0.46 (0.35-0.59) | 0.61 (0.28-0.74) | 0.04 (0-0.29)    | 0.35 (0.26-0.49) | 0.49 (0.15-0.73) | 0.12 (0-0.39)    | 0.39 (0.26-0.55) |
| Occipital Mid R      | 0.19 (0.02-0.43) | 0.29 (0.11-0.44) | 0.52 (0.41-0.64) | 0.46 (0.18-0.61) | 0 (0-0.21)       | 0.53 (0.39-0.69) | 0.62 (0.25-0.74) | 0.02 (0-0.29)    | 0.36 (0.25-0.52) |
| Occipital Inf L      | 0.22 (0-0.51)    | 0.13 (0-0.37)    | 0.64 (0.49-0.82) | 0.13 (0-0.29)    | 0 (0-0.17)       | 0.87 (0.71-1)    | 0.25 (0-0.49)    | 0.01 (0-0.25)    | 0.74 (0.51-0.98) |
| Occipital Inf R      | 0.24 (0-0.54)    | 0.16 (0-0.4)     | 0.6 (0.46-0.76)  | 0.34 (0-0.54)    | 0.04 (0-0.3)     | 0.62 (0.45-0.82) | 0.24 (0-0.52)    | 0.14 (0-0.38)    | 0.62 (0.45-0.8)  |
| Fusiform L           | 0.26 (0-0.55)    | 0.21 (0-0.46)    | 0.53 (0.41-0.68) | 0.21 (0-0.48)    | 0.19 (0-0.42)    | 0.6 (0.47-0.74)  | 0.33 (0-0.67)    | 0.27 (0-0.56)    | 0.4 (0.28-0.59)  |
| Fusiform R           | 0.37 (0.02-0.59) | 0.1 (0-0.36)     | 0.53 (0.41-0.68) | 0.25 (0-0.49)    | 0.09 (0-0.34)    | 0.66 (0.51-0.82) | 0.42 (0.02-0.6)  | 0.03 (0-0.36)    | 0.55 (0.4-0.73)  |
| Postcentral L        | 0.51 (0.23-0.63) | 0.01 (0-0.21)    | 0.48 (0.37-0.62) | 0.31 (0-0.61)    | 0.21 (0-0.5)     | 0.48 (0.34-0.65) | 0.28 (0-0.66)    | 0.29 (0-0.57)    | 0.42 (0.3-0.57)  |
| Postcentral R        | 0.67 (0.41-0.76) | 0 (0-0.21)       | 0.33 (0.24-0.44) | 0.46 (0.24-0.64) | 0.11 (0-0.32)    | 0.43 (0.33-0.55) | 0.71 (0.48-0.82) | 0.03 (0-0.19)    | 0.26 (0.17-0.4)  |
| Parietal Sup L       | 0.11 (0-0.34)    | 0.13 (0-0.31)    | 0.76 (0.61-0.91) | 0.01 (0-0.3)     | 0.36 (0.1-0.48)  | 0.64 (0.51-0.77) | 0.03 (0-0.29)    | 0.18 (0.03-0.32) | 0.79 (0.63-0.91) |
| Parietal Sup R       | 0.6 (0.35-0.79)  | 0.14 (0-0.35)    | 0.26 (0.19-0.35) | 0.08 (0-0.33)    | 0.4 (0.15-0.54)  | 0.53 (0.42-0.65) | 0.05 (0-0.42)    | 0.35 (0.04-0.53) | 0.59 (0.45-0.75) |
| Parietal Inf L       | 0.36 (0-0.6)     | 0.16 (0-0.4)     | 0.48 (0.36-0.65) | 0.13 (0-0.46)    | 0.33 (0.05-0.52) | 0.54 (0.41-0.68) | 0.21 (0-0.48)    | 0.12 (0-0.39)    | 0.66 (0.49-0.86) |
| Parietal Inf R       | 0.21 (0.01-0.47) | 0.26 (0.06-0.44) | 0.53 (0.42-0.65) | 0.33 (0.11-0.48) | 0.01 (0-0.17)    | 0.66 (0.52-0.81) | 0.58 (0.22-0.71) | 0.01 (0-0.3)     | 0.4 (0.29-0.56)  |
| SupraMarginal L      | 0.17 (0-0.39)    | 0.06 (0-0.26)    | 0.76 (0.6-0.93)  | 0.34 (0-0.56)    | 0.09 (0-0.35)    | 0.57 (0.43-0.75) | 0.22 (0-0.53)    | 0.22 (0-0.45)    | 0.56 (0.42-0.71) |
| SupraMarginal R      | 0.62 (0.4-0.71)  | 0.01 (0-0.17)    | 0.38 (0.28-0.5)  | 0.38 (0.14-0.58) | 0.1 (0-0.3)      | 0.52 (0.4-0.66)  | 0.58 (0.26-0.77) | 0.13 (0-0.37)    | 0.3 (0.2-0.44)   |
| Angular L            | 0.33 (0.02-0.48) | 0.03 (0-0.25)    | 0.65 (0.51-0.8)  | 0.01 (0-0.31)    | 0.21 (0-0.34)    | 0.78 (0.63-0.9)  | 0.03 (0-0.43)    | 0.33 (0-0.48)    | 0.64 (0.49-0.79) |
| Angular R            | 0.21 (0.01-0.47) | 0.22 (0-0.41)    | 0.57 (0.46-0.69) | 0.36 (0.1-0.52)  | 0.03 (0-0.23)    | 0.62 (0.47-0.77) | 0.43 (0.12-0.61) | 0.05 (0-0.28)    | 0.52 (0.38-0.69) |
| Precuneus L          | 0.71 (0.57-0.8)  | 0.02 (0-0.11)    | 0.27 (0.19-0.38) | 0.4 (0.2-0.67)   | 0.26 (0.03-0.44) | 0.34 (0.25-0.45) | 0.34 (0.16-0.57) | 0.3 (0.08-0.47)  | 0.36 (0.27-0.48) |
| Precuneus R          | 0.57 (0.32-0.79) | 0.2 (0-0.39)     | 0.24 (0.17-0.33) | 0.48 (0.13-0.7)  | 0.1 (0-0.36)     | 0.42 (0.28-0.59) | 0.39 (0.08-0.66) | 0.21 (0-0.48)    | 0.41 (0.29-0.56) |
| Paracentral Lobule L | 0.61 (0.41-0.72) | 0 (0-0.13)       | 0.39 (0.28-0.53) | 0.33 (0.04-0.52) | 0.02 (0-0.24)    | 0.65 (0.47-0.84) | 0.34 (0.06-0.57) | 0.11 (0-0.37)    | 0.55 (0.41-0.71) |
| Paracentral Lobule R | 0.5 (0.16-0.66)  | 0.05 (0-0.3)     | 0.45 (0.34-0.59) | 0.18 (0-0.44)    | 0.07 (0-0.3)     | 0.75 (0.56-0.93) | 0.13 (0-0.33)    | 0 (0-0.2)        | 0.87 (0.67-0.98) |
| Heschl L             | 0.39 (0.21-0.55) | 0 (0-0.08)       | 0.61 (0.45-0.78) | 0.19 (0.02-0.39) | 0.13 (0-0.28)    | 0.69 (0.53-0.84) | 0.27 (0.03-0.49) | 0.07 (0-0.27)    | 0.66 (0.49-0.85) |
| Heschl R             | 0.35 (0.06-0.48) | 0 (0-0.22)       | 0.65 (0.52-0.79) | 0.28 (0.05-0.44) | 0 (0-0.15)       | 0.72 (0.56-0.89) | 0.24 (0-0.44)    | 0 (0-0.17)       | 0.76 (0.56-0.95) |
| Temporal Sup L       | 0.55 (0.29-0.68) | 0.04 (0-0.23)    | 0.41 (0.31-0.54) | 0.62 (0.3-0.75)  | 0.03 (0-0.3)     | 0.35 (0.25-0.48) | 0.58 (0.25-0.76) | 0.1 (0-0.4)      | 0.31 (0.23-0.43) |
| Temporal Sup R       | 0.37 (0.07-0.67) | 0.28 (0.02-0.51) | 0.34 (0.26-0.46) | 0.52 (0.17-0.72) | 0.12 (0-0.42)    | 0.36 (0.26-0.49) | 0.58 (0.19-0.73) | 0.05 (0-0.38)    | 0.37 (0.27-0.52) |
| Temporal Pole Sup L  | 0.45 (0.16-0.69) | 0.16 (0-0.4)     | 0.39 (0.3-0.51)  | 0.18 (0.02-0.41) | 0.11 (0-0.29)    |                  |                  |                  |                  |

Table S3: Longitudinal variance component of regional CT controlling for average CT

|                      | Neonate          |                  |                  | 1-year           |                  |                  | 2-year           |                  |                  |
|----------------------|------------------|------------------|------------------|------------------|------------------|------------------|------------------|------------------|------------------|
|                      | $a^2$            | $c^2$            | $e^2$            | $a^2$            | $c^2$            | $e^2$            | $a^2$            | $c^2$            | $e^2$            |
| Precentral L         | 0.11 (0-0.29)    | 0.07 (0-0.2)     | 0.82 (0.68-0.95) | 0.21 (0-0.38)    | 0.02 (0-0.25)    | 0.77 (0.61-0.92) | 0.2 (0-0.48)     | 0.14 (0-0.38)    | 0.66 (0.48-0.85) |
| Precentral R         | 0.18 (0-0.35)    | 0 (0-0.15)       | 0.82 (0.65-0.97) | 0.28 (0-0.44)    | 0 (0-0.24)       | 0.72 (0.56-0.89) | 0.46 (0.07-0.61) | 0 (0-0.31)       | 0.54 (0.39-0.73) |
| Frontal Sup L        | 0.32 (0.07-0.49) | 0.07 (0-0.25)    | 0.62 (0.48-0.77) | 0.08 (0-0.29)    | 0.08 (0-0.22)    | 0.83 (0.67-0.97) | 0.12 (0-0.39)    | 0.17 (0-0.35)    | 0.71 (0.53-0.89) |
| Frontal Sup R        | 0.18 (0-0.54)    | 0.25 (0-0.45)    | 0.57 (0.44-0.72) | 0.15 (0-0.35)    | 0.09 (0-0.25)    | 0.76 (0.6-0.93)  | 0.31 (0.01-0.53) | 0.05 (0-0.29)    | 0.64 (0.46-0.85) |
| Frontal Sup Orb L    | 0 (0-0.24)       | 0.17 (0.01-0.29) | 0.83 (0.68-0.95) | 0.09 (0-0.44)    | 0.2 (0-0.4)      | 0.7 (0.52-0.87)  | 0.05 (0-0.26)    | 0.02 (0-0.19)    | 0.93 (0.74-1)    |
| Frontal Sup Orb R    | 0.06 (0-0.33)    | 0.17 (0-0.31)    | 0.77 (0.61-0.9)  | 0.08 (0-0.4)     | 0.24 (0.01-0.41) | 0.67 (0.53-0.81) | 0.05 (0-0.33)    | 0.22 (0.01-0.38) | 0.73 (0.57-0.87) |
| Frontal Mid L        | 0.01 (0-0.29)    | 0.23 (0.01-0.34) | 0.76 (0.62-0.89) | 0.02 (0-0.2)     | 0 (0-0.1)        | 0.97 (0.8-1)     | 0.05 (0-0.3)     | 0.07 (0-0.24)    | 0.89 (0.68-1)    |
| Frontal Mid R        | 0.15 (0-0.31)    | 0.03 (0-0.26)    | 0.82 (0.68-0.97) | 0.32 (0-0.53)    | 0.07 (0-0.36)    | 0.62 (0.46-0.8)  | 0.29 (0-0.5)     | 0 (0-0.32)       | 0.71 (0.5-0.95)  |
| Frontal Mid Orb L    | 0 (0-0.13)       | 0 (0-0.09)       | 1 (0.87-1)       | 0.15 (0-0.36)    | 0.05 (0-0.28)    | 0.8 (0.64-0.96)  | 0 (0-0.11)       | 0 (0-0.1)        | 1 (0.88-1)       |
| Frontal Mid Orb R    | 0.02 (0-0.31)    | 0.13 (0-0.25)    | 0.85 (0.67-0.97) | 0.15 (0-0.33)    | 0.02 (0-0.22)    | 0.83 (0.67-0.99) | 0.05 (0-0.28)    | 0.1 (0-0.27)     | 0.85 (0.68-0.99) |
| Frontal Inf Oper L   | 0.13 (0-0.3)     | 0.02 (0-0.2)     | 0.85 (0.7-0.99)  | 0.01 (0-0.18)    | 0.01 (0-0.1)     | 0.98 (0.82-1)    | 0.12 (0-0.41)    | 0.08 (0-0.32)    | 0.8 (0.59-0.99)  |
| Frontal Inf Oper R   | 0.01 (0-0.14)    | 0 (0-0.07)       | 0.99 (0.86-1)    | 0.15 (0-0.45)    | 0.11 (0-0.3)     | 0.74 (0.54-0.92) | 0.01 (0-0.41)    | 0.23 (0-0.4)     | 0.75 (0.57-0.93) |
| Frontal Inf Tri L    | 0.26 (0-0.4)     | 0 (0-0.26)       | 0.74 (0.6-0.89)  | 0.32 (0.05-0.49) | 0 (0-0.19)       | 0.68 (0.51-0.86) | 0.21 (0-0.39)    | 0.01 (0-0.25)    | 0.78 (0.61-0.95) |
| Frontal Inf Tri R    | 0.01 (0-0.16)    | 0 (0-0.08)       | 0.99 (0.84-1)    | 0.22 (0-0.38)    | 0 (0-0.19)       | 0.78 (0.62-0.94) | 0.19 (0-0.4)     | 0.01 (0-0.19)    | 0.8 (0.6-0.98)   |
| Frontal Inf Orb L    | 0.09 (0-0.44)    | 0.18 (0-0.34)    | 0.73 (0.56-0.88) | 0.13 (0-0.49)    | 0.18 (0-0.4)     | 0.69 (0.51-0.88) | 0.03 (0-0.28)    | 0.07 (0-0.23)    | 0.9 (0.7-1)      |
| Frontal Inf Orb R    | 0.05 (0-0.22)    | 0.02 (0-0.16)    | 0.93 (0.77-1)    | 0.03 (0-0.22)    | 0.06 (0-0.19)    | 0.91 (0.76-0.99) | 0.05 (0-0.37)    | 0.21 (0-0.38)    | 0.75 (0.57-0.92) |
| Rolandic Oper L      | 0.08 (0-0.35)    | 0.11 (0-0.26)    | 0.81 (0.65-0.93) | 0.27 (0-0.49)    | 0.03 (0-0.3)     | 0.69 (0.5-0.92)  | 0.57 (0.29-0.72) | 0 (0-0.18)       | 0.43 (0.28-0.63) |
| Rolandic Oper R      | 0.06 (0-0.21)    | 0 (0-0.1)        | 0.94 (0.79-1)    | 0.31 (0.01-0.49) | 0 (0-0.21)       | 0.69 (0.51-0.9)  | 0.45 (0.07-0.61) | 0 (0-0.28)       | 0.54 (0.39-0.74) |
| Supp Motor Area L    | 0.12 (0-0.32)    | 0.04 (0-0.19)    | 0.84 (0.67-0.99) | 0.1 (0-0.39)     | 0.11 (0-0.28)    | 0.79 (0.6-0.96)  | 0.29 (0-0.5)     | 0.04 (0-0.29)    | 0.67 (0.49-0.87) |
| Supp Motor Area R    | 0.04 (0-0.31)    | 0.15 (0-0.28)    | 0.81 (0.68-0.93) | 0.37 (0-0.55)    | 0.01 (0-0.26)    | 0.62 (0.45-0.84) | 0.31 (0-0.49)    | 0.02 (0-0.31)    | 0.67 (0.51-0.87) |
| Olfactory L          | 0.2 (0-0.39)     | 0.05 (0-0.26)    | 0.75 (0.59-0.91) | 0.04 (0-0.3)     | 0.22 (0.01-0.38) | 0.74 (0.59-0.9)  | 0.44 (0.06-0.65) | 0.04 (0-0.29)    | 0.52 (0.34-0.76) |
| Olfactory R          | 0.1 (0-0.28)     | 0.06 (0-0.19)    | 0.84 (0.69-0.96) | 0.32 (0.05-0.54) | 0.07 (0-0.26)    | 0.61 (0.43-0.8)  | 0.13 (0-0.47)    | 0.24 (0-0.44)    | 0.62 (0.45-0.8)  |
| Frontal Sup Medial L | 0.03 (0-0.21)    | 0 (0-0.12)       | 0.96 (0.79-1)    | 0.5 (0.23-0.67)  | 0 (0-0.14)       | 0.5 (0.33-0.71)  | 0.35 (0.01-0.55) | 0.01 (0-0.33)    | 0.64 (0.45-0.88) |
| Frontal Sup Medial R | 0.17 (0-0.3)     | 0 (0-0.18)       | 0.83 (0.7-0.94)  | 0.27 (0.01-0.46) | 0 (0-0.16)       | 0.73 (0.54-0.91) | 0.36 (0.02-0.57) | 0 (0-0.2)        | 0.64 (0.43-0.89) |
| Frontal Med Orb L    | 0 (0-0.19)       | 0.06 (0-0.16)    | 0.94 (0.8-1)     | 0.41 (0.06-0.58) | 0 (0-0.23)       | 0.59 (0.42-0.81) | 0.16 (0-0.36)    | 0.07 (0-0.26)    | 0.78 (0.61-0.94) |
| Frontal Med Orb R    | 0.16 (0-0.37)    | 0.06 (0-0.22)    | 0.77 (0.62-0.91) | 0.23 (0-0.56)    | 0.17 (0-0.41)    | 0.6 (0.41-0.8)   | 0.34 (0.04-0.52) | 0 (0-0.27)       | 0.66 (0.48-0.85) |
| Rectus L             | 0.32 (0.07-0.46) | 0 (0-0.18)       | 0.67 (0.54-0.82) | 0.18 (0-0.42)    | 0.07 (0-0.27)    | 0.75 (0.57-0.93) | 0.16 (0-0.42)    | 0.01 (0-0.14)    | 0.83 (0.57-1)    |
| Rectus R             | 0.18 (0-0.35)    | 0 (0-0.19)       | 0.82 (0.65-1)    | 0.44 (0.03-0.67) | 0.11 (0-0.41)    | 0.45 (0.32-0.63) | 0.26 (0-0.62)    | 0.18 (0-0.49)    | 0.56 (0.35-0.85) |
| Insula L             | 0.29 (0.09-0.45) | 0.01 (0-0.12)    | 0.7 (0.55-0.87)  | 0.51 (0.18-0.68) | 0 (0-0.17)       | 0.49 (0.32-0.73) | 0.05 (0-0.44)    | 0.29 (0-0.46)    | 0.66 (0.47-0.87) |
| Insula R             | 0.37 (0.16-0.52) | 0 (0-0.12)       | 0.63 (0.48-0.8)  | 0.44 (0-0.67)    | 0.09 (0-0.43)    | 0.47 (0.33-0.66) | 0.19 (0-0.55)    | 0.19 (0-0.43)    | 0.62 (0.43-0.83) |
| Cingulum Ant L       | 0.2 (0-0.43)     | 0.09 (0-0.32)    | 0.71 (0.56-0.87) | 0.07 (0-0.42)    | 0.26 (0-0.43)    | 0.68 (0.52-0.82) | 0.06 (0-0.48)    | 0.31 (0-0.5)     | 0.63 (0.45-0.8)  |
| Cingulum Ant R       | 0 (0-0.22)       | 0.18 (0-0.29)    | 0.82 (0.7-0.93)  | 0.38 (0-0.58)    | 0.04 (0-0.35)    | 0.58 (0.42-0.77) | 0.25 (0-0.46)    | 0.01 (0-0.31)    | 0.74 (0.53-0.93) |
| Cingulum Mid L       | 0.39 (0.04-0.52) | 0 (0-0.26)       | 0.61 (0.48-0.76) | 0.28 (0-0.47)    | 0.04 (0-0.3)     | 0.68 (0.52-0.85) | 0.28 (0-0.52)    | 0.1 (0-0.38)     | 0.62 (0.45-0.82) |
| Cingulum Mid R       | 0.06 (0-0.33)    | 0.21 (0-0.35)    | 0.73 (0.61-0.85) | 0.49 (0.14-0.66) | 0.02 (0-0.25)    | 0.49 (0.33-0.7)  | 0.22 (0.02-0.44) | 0.03 (0-0.22)    | 0.75 (0.54-0.94) |
| Cingulum Post L      | 0.08 (0-0.26)    | 0 (0-0.1)        | 0.92 (0.74-1)    | 0.43 (0.24-0.56) | 0 (0-0.15)       | 0.57 (0.44-0.71) | 0.65 (0.4-0.76)  | 0 (0-0.19)       | 0.35 (0.24-0.5)  |
| Cingulum Post R      | 0 (0-0.25)       | 0.13 (0-0.24)    | 0.87 (0.74-0.97) | 0.17 (0.03-0.46) | 0.04 (0-0.17)    | 0.79 (0.53-0.95) | 0.68 (0.46-0.79) | 0 (0-0.15)       | 0.32 (0.21-0.49) |
| ParaHippocampal L    | 0.42 (0.09-0.58) | 0.02 (0-0.24)    | 0.56 (0.42-0.72) | 0.15 (0-0.37)    | 0.04 (0-0.24)    | 0.81 (0.63-0.97) | 0.27 (0-0.48)    | 0.01 (0-0.29)    | 0.72 (0.52-0.94) |
| ParaHippocampal R    | 0.29 (0.11-0.46) | 0 (0-0.09)       | 0.71 (0.54-0.88) | 0.23 (0.03-0.44) | 0.07 (0-0.27)    | 0.7 (0.53-0.86)  | 0.31 (0.01-0.62) | 0.18 (0-0.47)    | 0.51 (0.37-0.68) |
| Calcarine L          | 0.17 (0-0.35)    | 0.01 (0-0.16)    | 0.82 (0.64-0.98) | 0.47 (0.28-0.63) | 0 (0-0.11)       | 0.53 (0.37-0.72) | 0.32 (0.09-0.67) | 0 (0-0.16)       | 0.47 (0.33-0.67) |
| Calcarine R          | 0.26 (0-0.42)    | 0.01 (0-0.25)    | 0.73 (0.58-0.9)  | 0.5 (0.19-0.66)  | 0.02 (0-0.25)    | 0.48 (0.33-0.67) | 0.05 (0-0.33)    | 0.36 (0.1-0.53)  | 0.58 (0.44-0.74) |
| Cuneus L             | 0.14 (0-0.29)    | 0 (0-0.17)       | 0.85 (0.71-0.99) | 0.13 (0-0.35)    | 0.07 (0-0.27)    | 0.79 (0.63-0.93) | 0.13 (0-0.46)    | 0.13 (0-0.38)    | 0.72 (0.53-0.9)  |
| Cuneus R             | 0.17 (0-0.36)    | 0.05 (0-0.24)    | 0.78 (0.63-0.92) | 0.19 (0-0.43)    | 0.06 (0-0.29)    | 0.75 (0.56-0.94) | 0.17 (0-0.42)    | 0.07 (0-0.35)    | 0.75 (0.57-0.95) |
| Lingual L            | 0.09 (0-0.36)    | 0.14 (0-0.28)    | 0.77 (0.6-0.91)  | 0.47 (0.21-0.66) | 0 (0-0.1)        | 0.53 (0.34-0.77) | 0.37 (0.1-0.58)  | 0.06 (0-0.29)    | 0.57 (0.4-0.78)  |
| Lingual R            | 0.05 (0-0.39)    | 0.23 (0.01-0.34) | 0.73 (0.55-0.86) | 0.38 (0.08-0.58) | 0.08 (0-0.3)     | 0.54 (0.39-0.72) | 0.31 (0.02-0.58) | 0.1 (0-0.35)     | 0.59 (0.41-0.81) |
| Occipital Sup L      | 0.03 (0-0.29)    | 0.15 (0-0.29)    | 0.82 (0.67-0.94) | 0 (0-0.32)       | 0.26 (0-0.4)     | 0.74 (0.59-0.89) | 0.06 (0-0.38)    | 0.17 (0-0.38)    | 0.77 (0.59-0.95) |
| Occipital Sup R      | 0.05 (0-0.29)    | 0.06 (0-0.2)     | 0.89 (0.71-1)    | 0.38 (0.12-0.57) | 0.08 (0-0.3)     | 0.54 (0.41-0.71) | 0.67 (0.39-0.78) | 0.01 (0-0.24)    | 0.33 (0.22-0.48) |
| Occipital Mid L      | 0.02 (0-0.28)    | 0.17 (0-0.29)    | 0.81 (0.68-0.93) | 0.11 (0-0.48)    | 0.2 (0-0.41)     | 0.69 (0.51-0.85) | 0.14 (0-0.42)    | 0.12 (0-0.36)    | 0.74 (0.56-0.92) |
| Occipital Mid R      | 0.11 (0-0.27)    | 0 (0-0.16)       | 0.89 (0.73-1)    | 0.13 (0-0.4)     | 0.14 (0-0.34)    | 0.73 (0.56-0.91) | 0.4 (0-0.56)     | 0 (0-0.41)       | 0.6 (0.44-0.81)  |
| Occipital Inf L      | 0.16 (0-0.34)    | 0 (0-0.15)       | 0.84 (0.66-0.99) | 0.03 (0-0.25)    | 0 (0-0.15)       | 0.97 (0.75-1)    | 0.12 (0-0.36)    | 0 (0-0.18)       | 0.88 (0.64-1)    |
| Occipital Inf R      | 0.38 (0.09-0.53) | 0.01 (0-0.18)    | 0.62 (0.47-0.79) | 0.03 (0-0.28)    | 0.12 (0-0.27)    | 0.85 (0.69-1)    | 0.05 (0-0.26)    | 0.06 (0-0.25)    | 0.89 (0.72-1)    |
| Fusiform L           | 0.11 (0-0.36)    | 0.15 (0-0.32)    | 0.74 (0.59-0.88) | 0.23 (0-0.44)    | 0.07 (0-0.32)    | 0.7 (0.54-0.87)  | 0.33 (0-0.57)    | 0.09 (0-0.4)     | 0.59 (0.41-0.81) |
| Fusiform R           | 0.19 (0-0.49)    | 0.18 (0-0.37)    | 0.62 (0.47-0.78) | 0.2 (0-0.44)     | 0.08 (0-0.49)    | 0.72 (0.54-0.9)  | 0.25 (0-0.48)    | 0.02 (0-0.28)    | 0.73 (0.51-0.96) |
| Postcentral L        | 0.31 (0-0.46)    | 0.01 (0-0.26)    | 0.68 (0.54-0.83) | 0.35 (0-0.64)    | 0.17 (0-0.47)    | 0.48 (0.35-0.65) | 0.19 (0-0.5)     | 0.22 (0-0.47)    | 0.59 (0.46-0.74) |
| Postcentral R        | 0.2 (0.01-0.36)  | 0.02 (0-0.17)    | 0.78 (0.64-0.94) | 0.34 (0.06-0.6)  | 0.13 (0-0.4)     | 0.52 (0.39-0.68) | 0.55 (0.22-0.7)  | 0 (0-0.27)       | 0.44 (0.3-0.63)  |
| Parietal Sup L       | 0.18 (0-0.46)    | 0.13 (0-0.36)    | 0.68 (0.53-0.84) | 0.22 (0-0.59)    | 0.22 (0-0.47)    | 0.57 (0.4-0.77)  | 0.04 (0-0.35)    | 0.16 (0-0.36)    | 0.8 (0.62-0.96)  |
| Parietal Sup R       | 0.01 (0-0.17)    | 0.09 (0-0.21)    | 0.9 (0.78-1)     | 0.53 (0.24-0.7)  | 0.02 (0-0.2)     | 0.45 (0.29-0.67) | 0.19 (0-0.5)     | 0.32 (0.06-0.52) | 0.49 (0.36-0.65) |
| Parietal Inf L       | 0.14 (0-0.29)    | 0 (0-0.16)       | 0.85 (0.71-0.97) | 0.15 (0-0.38)    | 0.05 (0-0.27)    | 0.8 (0.62-0.97)  | 0.19 (0-0.35)    | 0 (0-0.17)       | 0.81 (0.65-0.96) |
| Parietal Inf R       | 0.04 (0-0.26)    | 0.03 (0-0.16)    | 0.93 (0.74-1)    | 0.01 (0-0.15)    | 0.02 (0-0.12)    | 0.96 (0.83-1)    | 0.06 (0-0.31)    | 0.04 (0-0.18)    | 0.9 (0.69-1)     |
| SupraMarginal L      | 0.02 (0-0.19)    | 0.04 (0-0.15)    | 0.94 (0.8-1)     | 0.21 (0-0.41)    | 0.01 (0-0.18)    | 0.78 (0.59-0.96) | 0.16 (0-0.42)    | 0.09 (0-0.3)     | 0.75 (0.56-0.95) |
| SupraMarginal R      | 0.27 (0.02-0.42) | 0 (0-0.17)       | 0.73 (0.58-0.9)  | 0.18 (0-0.4)     | 0.05 (0-0.29)    | 0.77 (0.6-0.95)  | 0.15 (0-0.4)     | 0.13 (0-0.36)    | 0.72 (0.57-0.88) |
| Angular L            | 0 (0-0.12)       | 0.01 (0-0.08)    | 0.99 (0.88-1)    | 0.03 (0-0.35)    | 0.13 (0-0.29)    | 0.83 (0.63-0.98) | 0 (0-0.37)       | 0.21 (0-0.36)    | 0.79 (0.61-0.94) |
| Angular R            | 0.18 (0-0.44)    | 0.13 (0-0.35)    | 0.69 (0.56-0.83) | 0.23 (0-0.44)    | 0.05 (0-0.3)     | 0.72 (0.56-0.88) | 0.19 (0-0.41)    | 0.08 (0-0.32)    | 0.73 (0.58-0.88) |
| Precuneus L          | 0.12 (0-0.3)     | 0.02 (0-0.21)    | 0.86 (0.7-1)     | 0.19 (0-0.44)    | 0.06 (0-0.31)    | 0.75 (0.56-0.95) | 0.19 (0-0.45)    | 0.04 (0-0.28)    | 0.77 (0.55-0.97) |
| Precuneus R          | 0.13 (0-0.33)    | 0.04 (0-0.21)    | 0.83 (0.66-0.98) | 0.47 (0.19-0.64) | 0 (0-0.16)       | 0.53 (0.36-0.75) | 0.17 (0-0.52)    | 0.12 (0-0.33)    | 0.71 (0.48-0.91) |
| Paracentral Lobule L | 0.25 (0-0.45)    | 0.05 (0-0.26)    | 0.7 (0.54-0.87)  | 0.29 (0.02-0.54) | 0.1 (0-0.31)     | 0.61 (0.45-0.8)  | 0.24 (0-0.47)    | 0.02 (0-0.22)    | 0.74 (0.53-0.96) |
| Paracentral Lobule R | 0.07 (0-0.23)    | 0 (0-0.15)       | 0.93 (0.77-1)    | 0.05 (0-0.28)    | 0.07 (0-0.22)    | 0.88 (0.71-1)    | 0.14 (0-0.34)    | 0 (0-0.19)       | 0.86 (0.66-1)    |
| Heschl L             | 0.15 (0.03-0.27) | 0 (0-0.1)        | 0.85 (0.73-0.96) | 0.37 (0.15-0.52) | 0 (0-0.15)       | 0.63 (0.48-0.8)  | 0.08 (0-0.51)    | 0.16 (0-0.34)    | 0.76 (0.49-0.95) |
| Heschl R             | 0.33 (0.02-0.49) | 0.02 (0-0.22)    | 0.66 (0.51-0.84) | 0.06 (0-0.29)    | 0.09 (0-0.27)    | 0.85 (0.69-0.99) | 0.27 (0-0.5)     | 0 (0-0.21)       | 0.73 (0.49-0.97) |
| Temporal Sup L       | 0.25 (0-0.45)    | 0.03 (0-0.26)    | 0.72 (0.55-0.91) | 0.17 (0.01-0.34) | 0 (0-0.18)       | 0.82 (0.65-0.95) | 0.52 (0.08-0.67) | 0 (0-0.33)       | 0.48 (0.33-0.67) |
| Temporal Sup R       | 0.26 (0-0.43)    | 0 (0-0.14)       | 0.74 (0.57-0.94) | 0.29 (0.05-0.46) | 0.01 (0-0.19)    | 0.7 (0.53-0.89)  | 0.4 (0.05-0.61)  | 0.03 (0-0.29)    | 0.58 (0.39-0.81) |
| Temporal Pole Sup L  | 0.11 (0-0.36)    | 0.08 (0-0.26)    | 0.81 (0.64-0.96) | 0.28 (0.03-0.56) | 0.04 (0-0.22)    | 0.68 (0.43-0.94) | 0.43 (0.07-0.68) | 0.08 (0-0.33)    | 0.49 (0.32-0.72) |
| Temporal Pole Sup R  | 0.08 (0-0.31)    | 0.09 (0-0.22)    | 0.84 (0.68-0.96) | 0.26 (0.01-0.46) | 0.01 (0-0.17)    | 0.74 (0.54-0.93) | 0.34 (0-0.62)    | 0.11 (0-0.37)    | 0.55 (0.36-0.8)  |
| Temporal Mid L       | 0.1 (0-0.26)     | 0 (0-0.16)       | 0.9 (0.74-1)     | 0.22 (0-0.41)    | 0 (0-0.19)       | 0.78 (0.59-0.98) | 0.33 (0.01-0.5)  | 0 (0-0.24)       | 0.67 (0.5-0.87)  |
| Temporal Mid R       | 0.31 (0-0.48)    | 0.03 (0-0.29)    | 0.67 (0.52-0.84) | 0.02 (0-0.25)    | 0.04 (0-0.15)    | 0.94 (0.74-1)    | 0.01 (0-0.42)    | 0.22 (0-0.39)    | 0.77 (0.57-0     |

Table S4: Longitudinal variance component of regional SA controlling for total SA

|                      | Neonate          |                  |                  | 1-year           |                  |                  | 2-year           |                  |                  |
|----------------------|------------------|------------------|------------------|------------------|------------------|------------------|------------------|------------------|------------------|
|                      | $a^2$            | $c^2$            | $e^2$            | $a^2$            | $c^2$            | $e^2$            | $a^2$            | $c^2$            | $e^2$            |
| Precentral L         | 0.17 (0-0.51)    | 0.15 (0-0.37)    | 0.67 (0.49-0.85) | 0.24 (0-0.42)    | 0.02 (0-0.24)    | 0.74 (0.57-0.91) | 0.28 (0-0.48)    | 0.02 (0-0.29)    | 0.7 (0.52-0.89)  |
| Precentral R         | 0.16 (0-0.48)    | 0.18 (0-0.38)    | 0.66 (0.51-0.79) | 0.24 (0-0.41)    | 0.02 (0-0.23)    | 0.75 (0.58-0.92) | 0.04 (0-0.25)    | 0.04 (0-0.2)     | 0.92 (0.74-1)    |
| Frontal Sup L        | 0.1 (0-0.41)     | 0.16 (0-0.32)    | 0.74 (0.59-0.87) | 0.27 (0-0.46)    | 0.02 (0-0.27)    | 0.71 (0.54-0.92) | 0.27 (0-0.51)    | 0.08 (0-0.37)    | 0.65 (0.48-0.86) |
| Frontal Sup R        | 0.19 (0-0.47)    | 0.12 (0-0.35)    | 0.68 (0.53-0.84) | 0.21 (0-0.35)    | 0 (0-0.23)       | 0.79 (0.65-0.93) | 0.37 (0-0.55)    | 0.02 (0-0.4)     | 0.6 (0.45-0.8)   |
| Frontal Sup Orb L    | 0.31 (0.04-0.46) | 0.01 (0-0.19)    | 0.68 (0.53-0.85) | 0.12 (0-0.49)    | 0.24 (0-0.41)    | 0.63 (0.46-0.79) | 0.17 (0.01-0.35) | 0 (0-0.13)       | 0.83 (0.65-0.97) |
| Frontal Sup Orb R    | 0.01 (0-0.14)    | 0 (0-0.1)        | 0.99 (0.86-1)    | 0.3 (0-0.46)     | 0 (0-0.22)       | 0.7 (0.54-0.88)  | 0.15 (0-0.32)    | 0 (0-0.16)       | 0.85 (0.68-0.98) |
| Frontal Mid L        | 0.34 (0.07-0.5)  | 0.02 (0-0.21)    | 0.64 (0.5-0.79)  | 0.3 (0.02-0.46)  | 0 (0-0.2)        | 0.69 (0.54-0.87) | 0.41 (0-0.6)     | 0.04 (0-0.35)    | 0.55 (0.4-0.73)  |
| Frontal Mid R        | 0.19 (0-0.51)    | 0.3 (0.05-0.48)  | 0.51 (0.39-0.65) | 0.05 (0-0.31)    | 0.22 (0.02-0.36) | 0.74 (0.6-0.86)  | 0.13 (0-0.45)    | 0.21 (0-0.42)    | 0.66 (0.49-0.82) |
| Frontal Mid Orb L    | 0.22 (0-0.38)    | 0.01 (0-0.2)     | 0.77 (0.62-0.95) | 0.02 (0-0.39)    | 0.19 (0-0.33)    | 0.79 (0.6-0.92)  | 0.01 (0-0.34)    | 0.12 (0-0.27)    | 0.88 (0.65-1)    |
| Frontal Mid Orb R    | 0.29 (0.07-0.44) | 0 (0-0.14)       | 0.7 (0.56-0.86)  | 0.35 (0.04-0.51) | 0.01 (0-0.27)    | 0.64 (0.49-0.8)  | 0.39 (0.05-0.55) | 0 (0-0.28)       | 0.61 (0.45-0.79) |
| Frontal Inf Oper L   | 0.05 (0-0.21)    | 0.03 (0-0.13)    | 0.92 (0.78-1)    | 0.29 (0-0.5)     | 0.06 (0-0.3)     | 0.66 (0.49-0.85) | 0.15 (0-0.31)    | 0.02 (0-0.16)    | 0.83 (0.69-0.96) |
| Frontal Inf Oper R   | 0.09 (0-0.25)    | 0.01 (0-0.12)    | 0.9 (0.75-1)     | 0 (0-0.13)       | 0.01 (0-0.09)    | 0.99 (0.86-1)    | 0 (0-0.18)       | 0.01 (0-0.12)    | 0.98 (0.82-1)    |
| Frontal Inf Tri L    | 0.08 (0-0.24)    | 0 (0-0.13)       | 0.92 (0.76-1)    | 0.08 (0-0.26)    | 0 (0-0.18)       | 0.92 (0.74-1)    | 0.07 (0-0.23)    | 0 (0-0.17)       | 0.93 (0.77-1)    |
| Frontal Inf Tri R    | 0.28 (0-0.44)    | 0.01 (0-0.24)    | 0.7 (0.55-0.88)  | 0.21 (0-0.49)    | 0.18 (0-0.4)     | 0.62 (0.48-0.77) | 0.22 (0-0.43)    | 0.06 (0-0.33)    | 0.72 (0.56-0.9)  |
| Frontal Inf Orb L    | 0.5 (0.32-0.62)  | 0 (0-0.11)       | 0.5 (0.38-0.64)  | 0.29 (0.08-0.51) | 0.09 (0-0.27)    | 0.62 (0.48-0.78) | 0.46 (0.14-0.64) | 0.05 (0-0.3)     | 0.49 (0.36-0.65) |
| Frontal Inf Orb R    | 0.45 (0.13-0.61) | 0.04 (0-0.26)    | 0.51 (0.38-0.66) | 0.27 (0.01-0.48) | 0.08 (0-0.3)     | 0.66 (0.52-0.81) | 0.29 (0-0.6)     | 0.12 (0-0.41)    | 0.59 (0.4-0.81)  |
| Rolandic Oper L      | 0.33 (0.11-0.47) | 0 (0-0.15)       | 0.67 (0.53-0.83) | 0.16 (0.02-0.36) | 0.02 (0-0.15)    | 0.82 (0.63-0.96) | 0.25 (0.05-0.43) | 0.03 (0-0.19)    | 0.72 (0.55-0.89) |
| Rolandic Oper R      | 0.29 (0-0.5)     | 0.07 (0-0.31)    | 0.64 (0.49-0.82) | 0.2 (0-0.45)     | 0.11 (0-0.33)    | 0.69 (0.55-0.84) | 0.1 (0-0.4)      | 0.15 (0-0.33)    | 0.76 (0.6-0.9)   |
| Supp Motor Area L    | 0.33 (0-0.55)    | 0.09 (0-0.36)    | 0.58 (0.45-0.74) | 0.13 (0-0.42)    | 0.12 (0-0.31)    | 0.74 (0.57-0.88) | 0.18 (0-0.6)     | 0.26 (0-0.51)    | 0.56 (0.39-0.75) |
| Supp Motor Area R    | 0.2 (0-0.46)     | 0.1 (0-0.31)     | 0.7 (0.53-0.86)  | 0.01 (0-0.3)     | 0.22 (0-0.36)    | 0.77 (0.6-0.92)  | 0 (0-0.36)       | 0.26 (0-0.4)     | 0.74 (0.58-0.9)  |
| Olfactory L          | 0.16 (0-0.35)    | 0 (0-0.16)       | 0.84 (0.65-1)    | 0.18 (0-0.44)    | 0.07 (0-0.3)     | 0.75 (0.56-0.95) | 0.25 (0-0.53)    | 0.07 (0-0.35)    | 0.67 (0.47-0.91) |
| Olfactory R          | 0.27 (0.04-0.43) | 0 (0-0.14)       | 0.73 (0.57-0.9)  | 0.09 (0-0.37)    | 0.07 (0-0.26)    | 0.83 (0.62-1)    | 0.21 (0-0.45)    | 0.01 (0-0.26)    | 0.78 (0.55-1)    |
| Frontal Sup Medial L | 0.32 (0.06-0.47) | 0 (0-0.18)       | 0.68 (0.53-0.85) | 0.52 (0.25-0.67) | 0 (0-0.16)       | 0.48 (0.33-0.67) | 0.3 (0.12-0.47)  | 0 (0-0.12)       | 0.7 (0.53-0.87)  |
| Frontal Sup Medial R | 0.07 (0-0.23)    | 0 (0-0.11)       | 0.93 (0.77-1)    | 0.32 (0.05-0.49) | 0 (0-0.23)       | 0.68 (0.51-0.85) | 0.43 (0.15-0.6)  | 0 (0-0.18)       | 0.57 (0.4-0.77)  |
| Frontal Med Orb L    | 0.04 (0-0.23)    | 0.03 (0-0.17)    | 0.93 (0.77-1)    | 0.28 (0-0.51)    | 0.07 (0-0.39)    | 0.64 (0.49-0.83) | 0.26 (0-0.44)    | 0.01 (0-0.33)    | 0.73 (0.56-0.92) |
| Frontal Med Orb R    | 0.28 (0-0.5)     | 0.07 (0-0.32)    | 0.65 (0.5-0.83)  | 0.12 (0-0.3)     | 0.01 (0-0.16)    | 0.87 (0.7-0.99)  | 0.31 (0-0.52)    | 0 (0-0.19)       | 0.69 (0.48-0.92) |
| Rectus L             | 0.22 (0.01-0.4)  | 0 (0-0.15)       | 0.77 (0.6-0.93)  | 0.01 (0-0.34)    | 0.22 (0-0.36)    | 0.78 (0.6-0.92)  | 0.14 (0-0.52)    | 0.28 (0-0.5)     | 0.58 (0.42-0.75) |
| Rectus R             | 0.06 (0-0.32)    | 0.1 (0-0.24)     | 0.84 (0.68-0.96) | 0.24 (0-0.46)    | 0 (0-0.14)       | 0.76 (0.54-0.96) | 0.17 (0-0.37)    | 0.02 (0-0.18)    | 0.81 (0.63-0.96) |
| Insula L             | 0.71 (0.53-0.79) | 0 (0-0.13)       | 0.29 (0.21-0.4)  | 0.59 (0.36-0.73) | 0.01 (0-0.14)    | 0.4 (0.27-0.58)  | 0.63 (0.34-0.77) | 0.05 (0-0.29)    | 0.32 (0.23-0.46) |
| Insula R             | 0.59 (0.4-0.7)   | 0 (0-0.12)       | 0.41 (0.3-0.55)  | 0.6 (0.3-0.7)    | 0 (0-0.23)       | 0.4 (0.3-0.54)   | 0.47 (0.14-0.72) | 0.16 (0-0.43)    | 0.37 (0.26-0.52) |
| Cingulum Ant L       | 0.2 (0.02-0.37)  | 0.01 (0-0.15)    | 0.79 (0.63-0.93) | 0.25 (0.05-0.41) | 0 (0-0.19)       | 0.74 (0.58-0.89) | 0.39 (0.08-0.55) | 0 (0-0.25)       | 0.61 (0.45-0.79) |
| Cingulum Ant R       | 0.33 (0.11-0.5)  | 0 (0-0.11)       | 0.66 (0.5-0.85)  | 0.4 (0-0.58)     | 0.01 (0-0.33)    | 0.59 (0.42-0.81) | 0.32 (0.02-0.54) | 0.04 (0-0.27)    | 0.64 (0.46-0.86) |
| Cingulum Mid L       | 0.37 (0-0.52)    | 0 (0-0.27)       | 0.63 (0.48-0.82) | 0.09 (0-0.29)    | 0 (0-0.16)       | 0.91 (0.71-1)    | 0.14 (0-0.33)    | 0 (0-0.15)       | 0.86 (0.67-0.99) |
| Cingulum Mid R       | 0.32 (0.06-0.48) | 0.01 (0-0.16)    | 0.67 (0.52-0.84) | 0.38 (0.08-0.6)  | 0.01 (0-0.14)    | 0.6 (0.4-0.87)   | 0.14 (0-0.35)    | 0.15 (0.02-0.31) | 0.71 (0.53-0.9)  |
| Cingulum Post L      | 0.27 (0.07-0.43) | 0.01 (0-0.12)    | 0.72 (0.57-0.87) | 0.31 (0.08-0.48) | 0.04 (0-0.21)    | 0.66 (0.51-0.82) | 0.2 (0.01-0.48)  | 0.17 (0-0.39)    | 0.63 (0.49-0.78) |
| Cingulum Post R      | 0.01 (0-0.26)    | 0.06 (0-0.18)    | 0.93 (0.74-1)    | 0.47 (0.17-0.63) | 0 (0-0.19)       | 0.53 (0.37-0.72) | 0.41 (0.1-0.63)  | 0.04 (0-0.22)    | 0.56 (0.37-0.8)  |
| ParaHippocampal L    | 0.24 (0.08-0.39) | 0 (0-0.09)       | 0.76 (0.61-0.9)  | 0.14 (0-0.36)    | 0 (0-0.17)       | 0.86 (0.64-1)    | 0.28 (0.03-0.47) | 0 (0-0.23)       | 0.72 (0.53-0.91) |
| ParaHippocampal R    | 0.12 (0-0.47)    | 0.22 (0-0.39)    | 0.66 (0.5-0.8)   | 0.13 (0-0.39)    | 0.1 (0-0.29)     | 0.77 (0.58-0.92) | 0.24 (0-0.51)    | 0.01 (0-0.19)    | 0.75 (0.49-1)    |
| Calcarine L          | 0.33 (0.06-0.58) | 0.19 (0-0.4)     | 0.48 (0.37-0.61) | 0.37 (0.12-0.53) | 0.01 (0-0.19)    | 0.62 (0.46-0.79) | 0.43 (0.07-0.67) | 0.12 (0-0.42)    | 0.45 (0.33-0.61) |
| Calcarine R          | 0.35 (0.03-0.57) | 0.1 (0-0.34)     | 0.55 (0.43-0.71) | 0.63 (0.38-0.77) | 0 (0-0.13)       | 0.37 (0.23-0.59) | 0.21 (0.01-0.51) | 0.14 (0-0.35)    | 0.65 (0.47-0.81) |
| Cuneus L             | 0.25 (0-0.4)     | 0 (0-0.25)       | 0.75 (0.6-0.92)  | 0.22 (0.02-0.41) | 0 (0-0.13)       | 0.78 (0.59-0.94) | 0.26 (0.02-0.46) | 0 (0-0.19)       | 0.74 (0.54-0.93) |
| Cuneus R             | 0.22 (0.01-0.45) | 0.05 (0-0.2)     | 0.73 (0.55-0.91) | 0.16 (0-0.47)    | 0.03 (0-0.15)    | 0.81 (0.53-1)    | 0.16 (0.01-0.33) | 0.01 (0-0.15)    | 0.83 (0.66-0.97) |
| Lingual L            | 0.46 (0-0.65)    | 0.05 (0-0.36)    | 0.49 (0.35-0.7)  | 0.46 (0.12-0.6)  | 0.01 (0-0.26)    | 0.53 (0.4-0.7)   | 0.44 (0.11-0.61) | 0.03 (0-0.3)     | 0.54 (0.39-0.71) |
| Lingual R            | 0.17 (0-0.51)    | 0.33 (0.06-0.5)  | 0.5 (0.38-0.61)  | 0.45 (0.1-0.66)  | 0.07 (0-0.31)    | 0.48 (0.32-0.68) | 0.46 (0.08-0.68) | 0.04 (0-0.28)    | 0.49 (0.31-0.75) |
| Occipital Sup L      | 0.46 (0.22-0.59) | 0.01 (0-0.17)    | 0.54 (0.41-0.68) | 0.23 (0.03-0.43) | 0.03 (0-0.23)    | 0.74 (0.57-0.9)  | 0.34 (0.11-0.53) | 0.02 (0-0.2)     | 0.64 (0.47-0.82) |
| Occipital Sup R      | 0.38 (0-0.56)    | 0.04 (0-0.27)    | 0.59 (0.44-0.78) | 0.1 (0-0.27)     | 0.01 (0-0.15)    | 0.89 (0.72-1)    | 0.2 (0-0.41)     | 0.01 (0-0.2)     | 0.79 (0.59-0.98) |
| Occipital Mid L      | 0.41 (0.1-0.58)  | 0.06 (0-0.28)    | 0.54 (0.41-0.69) | 0.3 (0.03-0.56)  | 0.12 (0-0.34)    | 0.58 (0.43-0.75) | 0.2 (0-0.51)     | 0.13 (0-0.36)    | 0.67 (0.49-0.83) |
| Occipital Mid R      | 0.09 (0-0.31)    | 0.2 (0.05-0.32)  | 0.71 (0.58-0.83) | 0.22 (0-0.41)    | 0 (0-0.14)       | 0.78 (0.59-0.96) | 0.27 (0-0.49)    | 0.06 (0-0.25)    | 0.68 (0.49-0.88) |
| Occipital Inf L      | 0 (0-0.31)       | 0.15 (0-0.26)    | 0.85 (0.69-0.96) | 0 (0-0.11)       | 0 (0-0.09)       | 1 (0.88-1)       | 0 (0-0.22)       | 0.02 (0-0.13)    | 0.98 (0.78-1)    |
| Occipital Inf R      | 0.29 (0-0.43)    | 0 (0-0.27)       | 0.71 (0.57-0.87) | 0.26 (0-0.47)    | 0.02 (0-0.27)    | 0.71 (0.53-0.92) | 0.2 (0-0.4)      | 0.03 (0-0.25)    | 0.77 (0.58-0.94) |
| Fusiform L           | 0.23 (0-0.46)    | 0.11 (0-0.33)    | 0.67 (0.53-0.82) | 0.06 (0-0.35)    | 0.13 (0-0.3)     | 0.81 (0.64-0.94) | 0.12 (0-0.55)    | 0.21 (0-0.42)    | 0.68 (0.44-0.88) |
| Fusiform R           | 0.1 (0-0.33)     | 0.1 (0-0.24)     | 0.79 (0.63-0.91) | 0.13 (0-0.39)    | 0.15 (0-0.32)    | 0.72 (0.56-0.88) | 0.25 (0.01-0.46) | 0.01 (0-0.22)    | 0.73 (0.53-0.93) |
| Postcentral L        | 0.33 (0-0.48)    | 0.03 (0-0.28)    | 0.64 (0.51-0.8)  | 0.14 (0-0.46)    | 0.13 (0-0.37)    | 0.73 (0.54-0.91) | 0.11 (0-0.45)    | 0.15 (0-0.38)    | 0.74 (0.54-0.91) |
| Postcentral R        | 0.34 (0-0.5)     | 0.01 (0-0.27)    | 0.65 (0.5-0.82)  | 0.35 (0.14-0.49) | 0.01 (0-0.2)     | 0.64 (0.51-0.78) | 0.48 (0.24-0.64) | 0 (0-0.13)       | 0.52 (0.36-0.72) |
| Parietal Sup L       | 0 (0-0.13)       | 0 (0-0.11)       | 1 (0.87-1)       | 0.08 (0-0.26)    | 0 (0-0.2)        | 0.92 (0.74-1)    | 0.04 (0-0.22)    | 0 (0-0.13)       | 0.96 (0.78-1)    |
| Parietal Sup R       | 0.49 (0.09-0.64) | 0.02 (0-0.31)    | 0.48 (0.36-0.65) | 0.13 (0-0.36)    | 0.08 (0-0.29)    | 0.8 (0.63-0.96)  | 0.18 (0-0.38)    | 0.01 (0-0.29)    | 0.81 (0.62-1)    |
| Parietal Inf L       | 0.05 (0-0.42)    | 0.26 (0.01-0.39) | 0.69 (0.52-0.82) | 0.14 (0-0.43)    | 0.17 (0-0.37)    | 0.69 (0.53-0.85) | 0.18 (0-0.42)    | 0.05 (0-0.3)     | 0.77 (0.57-0.96) |
| Parietal Inf R       | 0.13 (0-0.36)    | 0.13 (0-0.31)    | 0.74 (0.61-0.88) | 0.16 (0-0.33)    | 0.01 (0-0.17)    | 0.83 (0.67-0.97) | 0.28 (0-0.52)    | 0.09 (0-0.38)    | 0.63 (0.45-0.83) |
| SupraMarginal L      | 0 (0-0.11)       | 0.02 (0-0.09)    | 0.98 (0.88-1)    | 0.15 (0-0.34)    | 0.03 (0-0.2)     | 0.82 (0.65-0.96) | 0.05 (0-0.31)    | 0.21 (0-0.36)    | 0.74 (0.59-0.89) |
| SupraMarginal R      | 0.4 (0.23-0.53)  | 0 (0-0.09)       | 0.6 (0.47-0.75)  | 0.19 (0-0.4)     | 0.07 (0-0.25)    | 0.75 (0.59-0.9)  | 0.34 (0-0.6)     | 0.1 (0-0.38)     | 0.56 (0.4-0.78)  |
| Angular L            | 0.22 (0-0.37)    | 0.01 (0-0.15)    | 0.78 (0.62-0.94) | 0.01 (0-0.32)    | 0.18 (0-0.31)    | 0.81 (0.64-0.93) | 0.02 (0-0.42)    | 0.29 (0-0.43)    | 0.69 (0.54-0.84) |
| Angular R            | 0.29 (0.01-0.46) | 0.05 (0-0.3)     | 0.66 (0.54-0.78) | 0.27 (0.01-0.44) | 0.03 (0-0.26)    | 0.7 (0.56-0.83)  | 0.39 (0.02-0.56) | 0.03 (0-0.33)    | 0.58 (0.44-0.75) |
| Precuneus L          | 0.55 (0.37-0.68) | 0 (0-0.09)       | 0.45 (0.32-0.61) | 0.44 (0.19-0.6)  | 0.04 (0-0.22)    | 0.53 (0.39-0.69) | 0.31 (0.12-0.5)  | 0.14 (0-0.32)    | 0.55 (0.42-0.7)  |
| Precuneus R          | 0.54 (0.23-0.69) | 0.02 (0-0.19)    | 0.44 (0.3-0.63)  | 0.41 (0.07-0.64) | 0.01 (0-0.18)    | 0.57 (0.36-0.84) | 0.23 (0.02-0.51) | 0.11 (0-0.32)    | 0.66 (0.48-0.85) |
| Paracentral Lobule L | 0.46 (0.22-0.61) | 0 (0-0.13)       | 0.54 (0.39-0.73) | 0.26 (0-0.47)    | 0.04 (0-0.28)    | 0.7 (0.52-0.9)   | 0.24 (0-0.5)     | 0.12 (0-0.4)     | 0.64 (0.49-0.81) |
| Paracentral Lobule R | 0.24 (0-0.48)    | 0.1 (0-0.29)     | 0.66 (0.51-0.83) | 0.03 (0-0.37)    | 0.17 (0-0.32)    | 0.81 (0.62-0.97) | 0 (0-0.23)       | 0.03 (0-0.19)    | 0.97 (0.77-1)    |
| Heschl L             | 0.35 (0.15-0.51) | 0 (0-0.09)       | 0.65 (0.49-0.84) | 0.16 (0.01-0.35) | 0.07 (0-0.22)    | 0.77 (0.61-0.94) | 0.27 (0.02-0.48) | 0.04 (0-0.27)    | 0.69 (0.51-0.88) |
| Heschl R             | 0.2 (0-0.34)     | 0 (0-0.17)       | 0.8 (0.66-0.95)  | 0.22 (0-0.39)    | 0 (0-0.18)       | 0.78 (0.61-0.95) | 0.2 (0-0.4)      | 0 (0-0.18)       | 0.8 (0.6-0.99)   |
| Temporal Sup L       | 0.29 (0.02-0.52) | 0.11 (0-0.32)    | 0.6 (0.46-0.75)  | 0.49 (0.16-0.66) | 0.04 (0-0.28)    | 0.47 (0.33-0.64) | 0.38 (0.07-0.66) | 0.21 (0-0.47)    | 0.41 (0.3-0.55)  |
| Temporal Sup R       | 0.36 (0-0.54)    | 0.05 (0-0.35)    | 0.59 (0.46-0.75) | 0.32 (0-0.48)    | 0.01 (0-0.31)    | 0.67 (0.52-0.83) | 0.22 (0-0.47)    | 0.11 (0-0.35)    | 0.67 (0.51-0.83) |
| Temporal Pole Sup L  | 0.21 (0-0.48)    | 0.14 (0-0.35)    | 0.65 (0.52-0.79) | 0.02 (0-0.28)    | 0.07 (0-0.21)    | 0.9 (0.7-0.99)   | 0.25 (0-0.49)    | 0.03 (0-0.21)    | 0.72 (0.5-0.94)  |
| Temporal Pole Sup R  | 0.29 (0-0.47)    | 0.03 (0-0.28)    | 0.68 (0.53-0.84) | 0.12 (0-0.33)    | 0.02 (0-0.2)     | 0.86 (0.67-1)    | 0.1 (0-0.33)     | 0 (0-0.19)       | 0.9 (0.67-1)     |
| Temporal Mid L       | 0.32 (0.13-0.47) | 0 (0-0.12)       | 0.68 (0.53-0.83) | 0.42 (0.18-0.56) | 0.01 (0-0.19)    | 0.57 (0.44-0.72) | 0.29 (0.07-0.47) | 0.02 (0-0.21)    | 0.69 (0.52-0.86) |
| Temporal Mid R       | 0.35 (0.05-0.51) | 0.01 (0-0.21)    | 0.63 (0.49-0.81) | 0.12 (0-0.41)    | 0.13 (0-0.31)    | 0.75 (           |                  |                  |                  |

Table S5: Heritability of longitudinal change in regional CT

|                      | Neonate to 1-year |                  |                  | 1-year to 2-year |                  |                  | Neonate to 2-year |                  |                  |
|----------------------|-------------------|------------------|------------------|------------------|------------------|------------------|-------------------|------------------|------------------|
|                      | $a^2_{\Delta}$    | $e^2_{\Delta}$   | $e^2_{\Delta}$   | $a^2_{\Delta}$   | $e^2_{\Delta}$   | $e^2_{\Delta}$   | $a^2_{\Delta}$    | $e^2_{\Delta}$   | $e^2_{\Delta}$   |
| Precentral L         | 0.01 (0-0.33)     | 0.38 (0.1-0.5)   | 0.61 (0.49-0.74) | 0.01 (0-0.18)    | 0.02 (0-0.15)    | 0.98 (0.82-1)    | 0 (0-0.38)        | 0.42 (0.1-0.53)  | 0.58 (0.44-0.71) |
| Precentral R         | 0.6 (0.28-0.72)   | 0 (0-0.24)       | 0.4 (0.28-0.55)  | 0.3 (0-0.57)     | 0 (0-0.35)       | 0.7 (0.43-0.99)  | 0.72 (0.35-0.82)  | 0 (0-0.29)       | 0.28 (0.18-0.43) |
| Frontal Sup L        | 0.29 (0-0.64)     | 0.31 (0.01-0.58) | 0.4 (0.28-0.54)  | 0.01 (0-0.36)    | 0.15 (0-0.37)    | 0.84 (0.62-1)    | 0.22 (0-0.64)     | 0.42 (0.04-0.65) | 0.36 (0.25-0.5)  |
| Frontal Sup R        | 0.66 (0.42-0.81)  | 0.1 (0-0.3)      | 0.24 (0.16-0.35) | 0.16 (0-0.55)    | 0.22 (0-0.47)    | 0.62 (0.39-0.88) | 0.52 (0.24-0.8)   | 0.26 (0.01-0.5)  | 0.22 (0.15-0.33) |
| Frontal Sup Orb L    | 0.17 (0-0.49)     | 0.14 (0-0.35)    | 0.7 (0.51-0.88)  | 0.07 (0-0.28)    | 0.08 (0-0.23)    | 0.85 (0.64-1)    | 0.05 (0-0.41)     | 0.21 (0-0.38)    | 0.74 (0.57-0.9)  |
| Frontal Sup Orb R    | 0.45 (0.15-0.59)  | 0 (0-0.22)       | 0.55 (0.41-0.73) | 0.02 (0-0.23)    | 0 (0-0.15)       | 0.98 (0.77-1)    | 0.35 (0.09-0.54)  | 0 (0-0.21)       | 0.64 (0.46-0.83) |
| Frontal Mid L        | 0.41 (0.01-0.68)  | 0.19 (0-0.49)    | 0.41 (0.29-0.57) | 0.08 (0-0.45)    | 0.28 (0-0.5)     | 0.65 (0.47-0.85) | 0.3 (0.02-0.65)   | 0.32 (0.01-0.57) | 0.38 (0.27-0.52) |
| Frontal Mid R        | 0.42 (0.03-0.7)   | 0.16 (0-0.46)    | 0.42 (0.3-0.59)  | 0.26 (0-0.5)     | 0.03 (0-0.38)    | 0.71 (0.49-0.97) | 0.48 (0.1-0.73)   | 0.15 (0-0.45)    | 0.38 (0.26-0.53) |
| Frontal Mid Orb L    | 0.34 (0-0.62)     | 0.13 (0-0.45)    | 0.53 (0.37-0.72) | 0.14 (0-0.38)    | 0.03 (0-0.27)    | 0.84 (0.61-0.98) | 0.13 (0-0.39)     | 0.11 (0-0.32)    | 0.76 (0.6-0.9)   |
| Frontal Mid Orb R    | 0.42 (0.04-0.6)   | 0.03 (0-0.33)    | 0.55 (0.4-0.73)  | 0.02 (0-0.31)    | 0.15 (0-0.36)    | 0.84 (0.64-1)    | 0.33 (0.02-0.51)  | 0.01 (0-0.27)    | 0.66 (0.49-0.86) |
| Frontal Inf Oper L   | 0.06 (0-0.38)     | 0.17 (0-0.33)    | 0.78 (0.6-0.9)   | 0.08 (0-0.34)    | 0.06 (0-0.28)    | 0.87 (0.64-0.98) | 0.17 (0-0.63)     | 0.32 (0-0.56)    | 0.51 (0.36-0.69) |
| Frontal Inf Oper R   | 0.18 (0-0.51)     | 0.25 (0.01-0.47) | 0.57 (0.41-0.74) | 0.11 (0-0.36)    | 0.01 (0-0.2)     | 0.88 (0.62-1)    | 0.03 (0-0.33)     | 0.28 (0.03-0.44) | 0.69 (0.53-0.82) |
| Frontal Inf Tri L    | 0.51 (0.18-0.67)  | 0.05 (0-0.32)    | 0.44 (0.32-0.59) | 0.04 (0-0.29)    | 0.06 (0-0.28)    | 0.91 (0.68-1)    | 0.55 (0.21-0.73)  | 0.07 (0-0.33)    | 0.38 (0.25-0.54) |
| Frontal Inf Tri R    | 0.47 (0.15-0.67)  | 0.1 (0-0.39)     | 0.43 (0.32-0.56) | 0.14 (0-0.38)    | 0.05 (0-0.24)    | 0.81 (0.58-0.99) | 0.64 (0.3-0.8)    | 0.02 (0-0.26)    | 0.34 (0.2-0.54)  |
| Frontal Inf Orb L    | 0.02 (0-0-0.4)    | 0.38 (0.05-0.51) | 0.61 (0.46-0.75) | 0.29 (0-0.54)    | 0.03 (0-0.38)    | 0.68 (0.46-0.94) | 0.06 (0-0.41)     | 0.29 (0.01-0.46) | 0.65 (0.5-0.81)  |
| Frontal Inf Orb R    | 0.36 (0.02-0.59)  | 0.11 (0-0.38)    | 0.53 (0.39-0.69) | 0.03 (0-0.29)    | 0.02 (0-0.22)    | 0.95 (0.71-1)    | 0.47 (0.06-0.7)   | 0.08 (0-0.36)    | 0.45 (0.28-0.66) |
| Rolandic Oper L      | 0.44 (0.08-0.61)  | 0 (0-0.23)       | 0.56 (0.39-0.77) | 0.32 (0-0.69)    | 0.18 (0-0.5)     | 0.5 (0.3-0.78)   | 0.42 (0.04-0.71)  | 0.15 (0-0.45)    | 0.43 (0.28-0.62) |
| Rolandic Oper R      | 0.16 (0-0.43)     | 0.08 (0-0.29)    | 0.76 (0.57-0.92) | 0.27 (0-0.54)    | 0.04 (0-0.33)    | 0.69 (0.46-0.93) | 0.39 (0.01-0.64)  | 0.09 (0-0.41)    | 0.52 (0.36-0.72) |
| Supp Motor Area L    | 0.44 (0.08-0.7)   | 0.15 (0-0.43)    | 0.41 (0.29-0.57) | 0.05 (0-0.37)    | 0.17 (0-0.38)    | 0.78 (0.57-0.99) | 0.57 (0.1-0.73)   | 0.04 (0-0.39)    | 0.4 (0.27-0.58)  |
| Supp Motor Area R    | 0.48 (0.16-0.66)  | 0.08 (0-0.32)    | 0.45 (0.32-0.61) | 0.1 (0-0.41)     | 0.12 (0-0.37)    | 0.78 (0.56-0.99) | 0.4 (0.08-0.67)   | 0.19 (0-0.46)    | 0.41 (0.28-0.56) |
| Olfactory L          | 0.1 (0-0.34)      | 0.07 (0-0.27)    | 0.83 (0.65-1)    | 0.31 (0.06-0.56) | 0.08 (0-0.29)    | 0.61 (0.39-0.85) | 0.17 (0-0.42)     | 0.05 (0-0.31)    | 0.78 (0.57-0.98) |
| Olfactory R          | 0.42 (0.04-0.6)   | 0.01 (0-0.27)    | 0.57 (0.4-0.78)  | 0.02 (0-0.24)    | 0.04 (0-0.2)     | 0.94 (0.72-1)    | 0.32 (0.01-0.59)  | 0.06 (0-0.33)    | 0.63 (0.4-0.84)  |
| Frontal Sup Medial L | 0.52 (0.15-0.72)  | 0.08 (0-0.37)    | 0.4 (0.27-0.57)  | 0.41 (0-0.62)    | 0 (0-0.37)       | 0.59 (0.38-0.87) | 0.45 (0.05-0.69)  | 0.1 (0-0.45)     | 0.45 (0.31-0.63) |
| Frontal Sup Medial R | 0.49 (0.06-0.71)  | 0.1 (0-0.42)     | 0.41 (0.29-0.58) | 0.21 (0-0.6)     | 0.18 (0-0.45)    | 0.61 (0.4-0.83)  | 0.39 (0.06-0.65)  | 0.12 (0-0.41)    | 0.48 (0.35-0.65) |
| Frontal Inf Orb L    | 0.29 (0.06-0.49)  | 0.02 (0-0.19)    | 0.69 (0.5-0.88)  | 0.08 (0-0.32)    | 0.1 (0-0.32)     | 0.81 (0.6-0.98)  | 0.12 (0.01-0.29)  | 0.01 (0-0.11)    | 0.87 (0.71-0.98) |
| Frontal Med Orb R    | 0.2 (0-0.58)      | 0.24 (0-0.48)    | 0.56 (0.4-0.75)  | 0.08 (0-0.47)    | 0.19 (0-0.41)    | 0.73 (0.51-0.91) | 0.11 (0-0.33)     | 0.04 (0-0.26)    | 0.85 (0.66-0.96) |
| Rectus L             | 0.28 (0.01-0.48)  | 0.05 (0-0.28)    | 0.67 (0.51-0.84) | 0.03 (0-0.29)    | 0.16 (0-0.33)    | 0.81 (0.61-1)    | 0.28 (0.03-0.47)  | 0 (0-0.19)       | 0.71 (0.53-0.91) |
| Rectus R             | 0.3 (0-0.54)      | 0.07 (0-0.33)    | 0.63 (0.45-0.85) | 0.41 (0.01-0.62) | 0 (0-0.24)       | 0.59 (0.38-0.87) | 0.38 (0-0.62)     | 0.06 (0-0.43)    | 0.56 (0.36-0.83) |
| Insula L             | 0.43 (0.06-0.61)  | 0.02 (0-0.24)    | 0.55 (0.38-0.77) | 0.14 (0-0.54)    | 0.25 (0-0.46)    | 0.61 (0.38-0.82) | 0.31 (0.01-0.65)  | 0.3 (0.03-0.55)  | 0.39 (0.24-0.59) |
| Insula R             | 0.45 (0.03-0.67)  | 0.09 (0-0.31)    | 0.47 (0.3-0.68)  | 0.03 (0-0.39)    | 0.26 (0-0.45)    | 0.71 (0.53-0.91) | 0.4 (0.09-0.66)   | 0.17 (0.01-0.39) | 0.43 (0.27-0.64) |
| Cingulum Ant L       | 0.1 (0-0.32)      | 0.09 (0-0.24)    | 0.82 (0.64-0.97) | 0.01 (0-0.21)    | 0 (0-0.18)       | 0.99 (0.79-1)    | 0.06 (0-0.37)     | 0.12 (0-0.27)    | 0.82 (0.59-0.98) |
| Cingulum Ant R       | 0.15 (0-0.47)     | 0.17 (0-0.38)    | 0.68 (0.52-0.85) | 0 (0-0.26)       | 0.05 (0-0.25)    | 0.95 (0.74-1)    | 0.15 (0-0.48)     | 0.15 (0-0.41)    | 0.7 (0.51-0.89)  |
| Cingulum Mid L       | 0.31 (0-0.52)     | 0.02 (0-0.25)    | 0.67 (0.48-0.88) | 0.11 (0-0.65)    | 0.33 (0-0.57)    | 0.56 (0.34-0.8)  | 0.4 (0-0.65)      | 0.08 (0-0.39)    | 0.53 (0.34-0.77) |
| Cingulum Mid R       | 0.42 (0.12-0.63)  | 0.05 (0-0.27)    | 0.53 (0.36-0.73) | 0.02 (0-0.36)    | 0.14 (0-0.36)    | 0.83 (0.61-1)    | 0.36 (0.05-0.61)  | 0.1 (0-0.35)     | 0.55 (0.37-0.76) |
| Cingulum Post L      | 0.13 (0.01-0.3)   | 0 (0-0.15)       | 0.87 (0.7-0.98)  | 0.07 (0-0.23)    | 0 (0-0.16)       | 0.93 (0.76-0.99) | 0.24 (0.03-0.43)  | 0 (0-0.19)       | 0.76 (0.57-0.93) |
| Cingulum Post R      | 0.12 (0.01-0.32)  | 0.03 (0-0.14)    | 0.85 (0.67-0.96) | 0.26 (0.04-0.53) | 0.09 (0-0.3)     | 0.65 (0.45-0.85) | 0.44 (0.17-0.67)  | 0.13 (0-0.34)    | 0.43 (0.29-0.62) |
| ParaHippocampal L    | 0.44 (0.1-0.62)   | 0.02 (0-0.28)    | 0.54 (0.38-0.73) | 0.02 (0-0.24)    | 0.01 (0-0.18)    | 0.97 (0.76-1)    | 0.5 (0.16-0.67)   | 0 (0-0.23)       | 0.5 (0.33-0.71)  |
| ParaHippocampal R    | 0.03 (0.0-0.25)   | 0.12 (0.01-0.24) | 0.85 (0.67-0.97) | 0.09 (0-0.41)    | 0.06 (0-0.24)    | 0.85 (0.56-0.99) | 0.08 (0-0.39)     | 0.27 (0.04-0.44) | 0.65 (0.47-0.83) |
| Calcarine L          | 0.26 (0.07-0.45)  | 0.06 (0-0.23)    | 0.68 (0.51-0.85) | 0.21 (0.02-0.42) | 0.03 (0.0-0.22)  | 0.77 (0.56-0.97) | 0.53 (0.2-0.7)    | 0.02 (0-0.24)    | 0.45 (0.29-0.67) |
| Calcarine R          | 0.39 (0.03-0.59)  | 0.06 (0-0.33)    | 0.55 (0.4-0.75)  | 0.28 (0.03-0.57) | 0.18 (0.02-0.41) | 0.54 (0.33-0.81) | 0.11 (0-0.43)     | 0.27 (0.02-0.48) | 0.62 (0.46-0.8)  |
| Cuneus L             | 0.01 (0-0.19)     | 0.17 (0.04-0.29) | 0.82 (0.69-0.93) | 0 (0-0.21)       | 0.12 (0.01-0.28) | 0.88 (0.71-0.97) | 0.01 (0-0.27)     | 0.34 (0.11-0.47) | 0.65 (0.52-0.8)  |
| Cuneus R             | 0.19 (0-0.59)     | 0.27 (0-0.48)    | 0.54 (0.37-0.73) | 0.31 (0-0.56)    | 0.01 (0-0.29)    | 0.68 (0.44-0.95) | 0.06 (0-0.46)     | 0.29 (0-0.47)    | 0.65 (0.49-0.8)  |
| Lingual L            | 0.1 (0-0.38)      | 0.21 (0.04-0.36) | 0.69 (0.52-0.85) | 0.01 (0-0.26)    | 0.2 (0.01-0.38)  | 0.78 (0.59-0.98) | 0.04 (0-0.29)     | 0.36 (0.14-0.51) | 0.6 (0.46-0.76)  |
| Lingual R            | 0.28 (0.02-0.58)  | 0.22 (0-0.44)    | 0.51 (0.37-0.67) | 0.02 (0-0.37)    | 0.15 (0-0.37)    | 0.83 (0.61-1)    | 0.28 (0-0.69)     | 0.26 (0-0.51)    | 0.45 (0.29-0.64) |
| Occipital Sup L      | 0 (0-0.16)        | 0.45 (0.29-0.56) | 0.55 (0.44-0.68) | 0.11 (0-0.43)    | 0.05 (0-0.33)    | 0.84 (0.56-1)    | 0.02 (0-0.23)     | 0.46 (0.26-0.58) | 0.52 (0.4-0.66)  |
| Occipital Sup R      | 0.02 (0-0.41)     | 0.37 (0.07-0.51) | 0.61 (0.45-0.74) | 0.15 (0-0.52)    | 0.15 (0-0.4)     | 0.7 (0.48-0.91)  | 0.12 (0-0.49)     | 0.34 (0.03-0.51) | 0.55 (0.43-0.68) |
| Occipital Mid L      | 0.03 (0-0.36)     | 0.41 (0.12-0.54) | 0.57 (0.43-0.7)  | 0.14 (0-0.37)    | 0.01 (0-0.28)    | 0.85 (0.63-1)    | 0.05 (0-0.43)     | 0.38 (0.08-0.53) | 0.58 (0.42-0.72) |
| Occipital Mid R      | 0.15 (0-0.41)     | 0.09 (0-0.31)    | 0.75 (0.57-0.93) | 0.04 (0-0.48)    | 0.25 (0-0.46)    | 0.71 (0.51-0.93) | 0.24 (0-0.51)     | 0.12 (0-0.41)    | 0.64 (0.47-0.84) |
| Occipital Inf L      | 0.23 (0-0.43)     | 0 (0-0.24)       | 0.77 (0.57-0.99) | 0.3 (0-0.5)      | 0 (0-0.32)       | 0.7 (0.5-0.92)   | 0.16 (0-0.37)     | 0 (0-0.21)       | 0.84 (0.63-1)    |
| Occipital Inf R      | 0.21 (0-0.53)     | 0.23 (0-0.43)    | 0.56 (0.4-0.73)  | 0.05 (0-0.6)     | 0.35 (0-0.55)    | 0.61 (0.39-0.83) | 0.25 (0.01-0.56)  | 0.21 (0-0.44)    | 0.54 (0.39-0.72) |
| Fusiform L           | 0.2 (0-0.54)      | 0.21 (0-0.43)    | 0.59 (0.44-0.75) | 0.22 (0-0.49)    | 0.05 (0-0.34)    | 0.73 (0.49-0.97) | 0.44 (0.02-0.69)  | 0.11 (0-0.42)    | 0.45 (0.3-0.65)  |
| Fusiform R           | 0.21 (0-0.52)     | 0.16 (0-0.38)    | 0.64 (0.45-0.83) | 0.28 (0-0.61)    | 0.04 (0-0.26)    | 0.67 (0.38-0.98) | 0.44 (0.02-0.68)  | 0.06 (0-0.33)    | 0.5 (0.3-0.75)   |
| Postcentral L        | 0.46 (0.16-0.65)  | 0.1 (0-0.32)     | 0.44 (0.31-0.6)  | 0.14 (0-0.34)    | 0.11 (0-0.37)    | 0.75 (0.55-0.95) | 0.37 (0.08-0.61)  | 0.23 (0.03-0.47) | 0.41 (0.29-0.55) |
| Postcentral R        | 0.2 (0-0.51)      | 0.31 (0.04-0.51) | 0.49 (0.37-0.63) | 0.32 (0.03-0.58) | 0.1 (0-0.4)      | 0.58 (0.39-0.82) | 0.42 (0.05-0.66)  | 0.16 (0-0.46)    | 0.42 (0.3-0.57)  |
| Parietal Sup L       | 0.24 (0.01-0.57)  | 0.36 (0.08-0.57) | 0.4 (0.29-0.52)  | 0.18 (0-0.55)    | 0.18 (0-0.48)    | 0.64 (0.41-0.9)  | 0.35 (0-0.67)     | 0.25 (0-0.54)    | 0.4 (0.28-0.58)  |
| Parietal Sup R       | 0.22 (0.01-0.52)  | 0.3 (0.07-0.5)   | 0.47 (0.35-0.61) | 0.21 (0-0.58)    | 0.21 (0-0.52)    | 0.58 (0.36-0.84) | 0.09 (0-0.36)     | 0.45 (0.22-0.59) | 0.46 (0.34-0.59) |
| Parietal Inf L       | 0.36 (0-0.55)     | 0.03 (0-0.36)    | 0.61 (0.45-0.8)  | 0.33 (0-0.58)    | 0.05 (0-0.39)    | 0.63 (0.41-0.88) | 0.51 (0.02-0.7)   | 0.06 (0-0.42)    | 0.43 (0.29-0.64) |
| Parietal Inf R       | 0.2 (0-0.43)      | 0.05 (0-0.27)    | 0.75 (0.57-0.92) | 0.22 (0-0.44)    | 0 (0-0.3)        | 0.78 (0.56-0.98) | 0.41 (0.06-0.62)  | 0.04 (0-0.3)     | 0.55 (0.38-0.76) |
| SupraMarginal L      | 0.43 (0.18-0.6)   | 0 (0-0.17)       | 0.57 (0.4-0.76)  | 0.02 (0-0.34)    | 0.07 (0-0.27)    | 0.91 (0.65-1)    | 0.49 (0.22-0.64)  | 0.02 (0-0.23)    | 0.49 (0.35-0.66) |
| SupraMarginal R      | 0.5 (0.19-0.63)   | 0.01 (0-0.22)    | 0.5 (0.37-0.66)  | 0.06 (0-0.3)     | 0.05 (0-0.27)    | 0.88 (0.65-1)    | 0.56 (0.16-0.73)  | 0.04 (0-0.26)    | 0.4 (0.25-0.6)   |
| Angular L            | 0.02 (0-0.27)     | 0.13 (0-0.26)    | 0.85 (0.68-0.95) | 0.2 (0-0.61)     | 0.2 (0-0.51)     | 0.6 (0.38-0.85)  | 0.01 (0-0.29)     | 0.18 (0.02-0.3)  | 0.81 (0.62-0.92) |
| Angular R            | 0.12 (0-0.33)     | 0.06 (0-0.25)    | 0.82 (0.65-0.97) | 0.35 (0-0.61)    | 0.09 (0-0.47)    | 0.56 (0.38-0.8)  | 0 (0-0.29)        | 0.15 (0-0.3)     | 0.85 (0.69-0.99) |
| Precuneus L          | 0.52 (0.19-0.71)  | 0.1 (0-0.35)     | 0.38 (0.26-0.53) | 0.14 (0-0.46)    | 0.1 (0-0.36)     | 0.77 (0.54-0.98) | 0.53 (0.19-0.68)  | 0.04 (0-0.31)    | 0.43 (0.31-0.59) |
| Precuneus R          | 0.36 (0.06-0.57)  | 0.04 (0-0.27)    | 0.6 (0.42-0.8)   | 0.34 (0-0.7)     | 0.24 (0-0.59)    | 0.43 (0.27-0.65) | 0.19 (0.01-0.53)  | 0.19 (0-0.41)    | 0.62 (0.44-0.8)  |
| Paracentral Lobule L | 0.34 (0.05-0.54)  | 0.04 (0-0.26)    | 0.61 (0.46-0.8)  | 0.02 (0-0.27)    | 0.1 (0-0.28)     | 0.89 (0.7-1)     | 0.43 (0.09-0.63)  | 0 (0-0.2)        | 0.57 (0.37-0.8)  |
| Paracentral Lobule R | 0.29 (0.01-0.5)   | 0.07 (0-0.28)    | 0.64 (0.47-0.82) | 0.12 (0-0.4)     | 0.09 (0-0.35)    | 0.79 (0.57-1)    | 0.45 (0.08-0.62)  | 0.01 (0-0.27)    | 0.54 (0.38-0.74) |
| Heschl L             | 0.03 (0-0.2)      | 0.01 (0-0.15)    | 0.96 (0.79-1)    | 0.19 (0-0.43)    | 0.06 (0-0.28)    | 0.75 (0.56-0.93) | 0.19 (0-0.51)     | 0.13 (0-0.4)     | 0.67 (0.48-0.89) |
| Heschl R             | 0.21 (0.02-0.41)  | 0.04 (0-0.2)     | 0.75 (0.57-0.93) | 0.4 (0-0.65)     | 0.06 (0-0.34)    | 0.54 (0.34-0.81) | 0.47 (0.14-0.66)  | 0 (0-0.19)       | 0.53 (0.34-0.76) |
| Temporal Sup L       | 0.22 (0.01-0.44)  | 0.05 (0-0.25)    | 0.73 (0.55-0.9)  | 0.12 (0-0.34)    | 0.02 (0-0.26)    | 0.86 (0.66-0.99) | 0.44 (0.04-0.64)  | 0.04 (0-0.33)    | 0.52 (0.35-0.73) |
| Temporal Sup R       | 0.17 (0-0.47)     | 0.21 (0.02-0.4)  | 0.62 (0.45-0.81) | 0.03 (0-0.33)    | 0.12 (0-0.33)    | 0.86 (0.64-0.98) | 0.21 (0-0.53)     | 0.3 (0.07-0.52)  | 0.49 (0.32-0.69) |
| Temporal Pole Sup L  | 0.23 (0.01-0.45)  | 0.05 (0-0.27)    | 0.72 (0.54-0.91) | 0.01 (0-0.46)    | 0.18 (0-0.38)    | 0.82 (0.54-0.99) | 0.25 (0.01-0.59)  | 0.17 (0-0.42)    | 0.58 (0.4-0.77)  |
| Temporal Pole Sup R  | 0.09 (0-0.35)     | 0.06 (0-0.22)    | 0.85 (0.65-0.96) | 0.03 (0-0.41)    | 0.14 (0-0.34)    | 0.83 (0.58-0.97) | 0.16 (0-0.58)     | 0.24 (0-0.45)    | 0.61             |

Table S6: Heritability of longitudinal change in regional SA

|                      | Neonate to 1-year |                  |                  | 1-year to 2-year |                  |                  | Neonate to 2-year |                  |                  |
|----------------------|-------------------|------------------|------------------|------------------|------------------|------------------|-------------------|------------------|------------------|
|                      | $a^2_{\Delta}$    | $c^2_{\Delta}$   | $e^2_{\Delta}$   | $a^2_{\Delta}$   | $c^2_{\Delta}$   | $e^2_{\Delta}$   | $a^2_{\Delta}$    | $c^2_{\Delta}$   | $e^2_{\Delta}$   |
| Precentral L         | 0.34 (0-0.58)     | 0.04 (0-0.34)    | 0.63 (0.42-0.85) | 0.02 (0-0.15)    | 0 (0-0.15)       | 0.98 (0.84-1)    | 0.38 (0-0.58)     | 0.04 (0-0.41)    | 0.59 (0.42-0.79) |
| Precentral R         | 0.03 (0-0.43)     | 0.23 (0-0.4)     | 0.73 (0.52-0.9)  | 0.07 (0-0.42)    | 0.16 (0-0.38)    | 0.77 (0.57-0.98) | 0.04 (0-0.45)     | 0.34 (0-0.49)    | 0.62 (0.46-0.77) |
| Frontal Sup L        | 0.28 (0-0.5)      | 0.06 (0-0.31)    | 0.66 (0.46-0.89) | 0 (0-0.31)       | 0.16 (0-0.35)    | 0.84 (0.63-1)    | 0.26 (0-0.48)     | 0.02 (0-0.28)    | 0.72 (0.52-0.93) |
| Frontal Sup R        | 0.14 (0-0.45)     | 0.17 (0-0.37)    | 0.69 (0.51-0.85) | 0.05 (0-0.32)    | 0.13 (0-0.36)    | 0.83 (0.62-0.95) | 0.26 (0-0.74)     | 0.07 (0-0.67)    | 0.37 (0.23-0.58) |
| Frontal Sup Orb L    | 0.34 (0-0.65)     | 0.15 (0-0.46)    | 0.51 (0.33-0.75) | 0 (0-0.44)       | 0.29 (0-0.46)    | 0.71 (0.51-0.91) | 0.35 (0-0.59)     | 0.04 (0-0.39)    | 0.61 (0.41-0.86) |
| Frontal Sup Orb R    | 0.15 (0.01-0.46)  | 0.32 (0.08-0.49) | 0.53 (0.39-0.68) | 0.07 (0-0.32)    | 0.01 (0-0.18)    | 0.92 (0.67-0.99) | 0.06 (0-0.35)     | 0.28 (0.07-0.45) | 0.66 (0.49-0.82) |
| Frontal Mid L        | 0.18 (0.01-0.4)   | 0.12 (0-0.31)    | 0.7 (0.53-0.89)  | 0.14 (0-0.44)    | 0.09 (0-0.3)     | 0.77 (0.58-0.97) | 0.43 (0.02-0.66)  | 0.03 (0-0.3)     | 0.54 (0.34-0.8)  |
| Frontal Mid R        | 0.28 (0.03-0.5)   | 0.09 (0-0.31)    | 0.63 (0.46-0.8)  | 0.06 (0-0.23)    | 0 (0-0.18)       | 0.94 (0.76-1)    | 0.54 (0.12-0.74)  | 0.1 (0-0.42)     | 0.37 (0.24-0.55) |
| Frontal Mid Orb L    | 0.36 (0-0.66)     | 0.14 (0-0.45)    | 0.5 (0.33-0.71)  | 0 (0-0.35)       | 0.16 (0-0.36)    | 0.84 (0.62-1)    | 0.42 (0-0.61)     | 0.02 (0-0.41)    | 0.57 (0.38-0.78) |
| Frontal Mid Orb R    | 0.33 (0-0.56)     | 0.08 (0-0.42)    | 0.59 (0.44-0.79) | 0.01 (0-0.34)    | 0.11 (0-0.36)    | 0.88 (0.63-1)    | 0.33 (0-0.52)     | 0.01 (0-0.36)    | 0.66 (0.48-0.87) |
| Frontal Inf Oper L   | 0 (0-0.42)        | 0.27 (0-0.41)    | 0.73 (0.55-0.87) | 0 (0-0.27)       | 0.09 (0-0.28)    | 0.91 (0.72-1)    | 0 (0-0.36)        | 0.26 (0-0.41)    | 0.74 (0.57-0.91) |
| Frontal Inf Oper R   | 0.25 (0-0.62)     | 0.18 (0-0.45)    | 0.57 (0.37-0.79) | 0.02 (0-0.49)    | 0.23 (0-0.48)    | 0.74 (0.48-1)    | 0.45 (0-0.65)     | 0.02 (0-0.42)    | 0.53 (0.35-0.77) |
| Frontal Inf Tri L    | 0.12 (0-0.36)     | 0.06 (0-0.22)    | 0.82 (0.63-0.98) | 0 (0-0.11)       | 0 (0-0.11)       | 1 (0.89-1)       | 0.13 (0-0.4)      | 0.08 (0-0.27)    | 0.79 (0.58-0.98) |
| Frontal Inf Tri R    | 0.07 (0-0.47)     | 0.25 (0-0.42)    | 0.68 (0.46-0.87) | 0.03 (0-0.28)    | 0.1 (0-0.3)      | 0.87 (0.66-1)    | 0.15 (0-0.53)     | 0.11 (0-0.31)    | 0.74 (0.44-0.98) |
| Frontal Inf Orb L    | 0.19 (0.03-0.6)   | 0.32 (0.01-0.5)  | 0.49 (0.33-0.64) | 0.12 (0-0.45)    | 0.07 (0-0.34)    | 0.81 (0.55-0.99) | 0.16 (0-0.6)      | 0.34 (0-0.56)    | 0.5 (0.33-0.68)  |
| Frontal Inf Orb R    | 0.31 (0.03-0.47)  | 0.02 (0-0.28)    | 0.67 (0.53-0.82) | 0.14 (0.01-0.32) | 0.04 (0-0.22)    | 0.82 (0.65-0.95) | 0.66 (0.12-0.84)  | 0.07 (0-0.45)    | 0.27 (0.16-0.5)  |
| Rolandic Oper L      | 0.12 (0-0.4)      | 0.09 (0-0.31)    | 0.79 (0.59-0.98) | 0.2 (0-0.46)     | 0.05 (0-0.37)    | 0.74 (0.53-0.97) | 0 (0-0.39)        | 0.22 (0-0.39)    | 0.77 (0.59-0.95) |
| Rolandic Oper R      | 0 (0-0.35)        | 0.29 (0-0.44)    | 0.7 (0.54-0.86)  | 0.02 (0-0.26)    | 0 (0-0.17)       | 0.97 (0.73-1)    | 0.02 (0-0.45)     | 0.31 (0-0.46)    | 0.66 (0.47-0.83) |
| Supp Motor Area L    | 0.12 (0-0.39)     | 0.06 (0-0.29)    | 0.82 (0.6-0.98)  | 0.05 (0-0.48)    | 0.28 (0-0.48)    | 0.67 (0.45-0.86) | 0.19 (0-0.57)     | 0.21 (0-0.51)    | 0.59 (0.41-0.8)  |
| Supp Motor Area R    | 0.31 (0-0.65)     | 0.14 (0-0.45)    | 0.56 (0.34-0.82) | 0.06 (0-0.32)    | 0.14 (0-0.38)    | 0.8 (0.57-1)     | 0.21 (0-0.61)     | 0.27 (0-0.53)    | 0.52 (0.35-0.75) |
| Olfactory L          | 0.13 (0-0.47)     | 0.18 (0-0.36)    | 0.69 (0.5-0.86)  | 0.38 (0.03-0.61) | 0.01 (0-0.26)    | 0.61 (0.39-0.88) | 0.03 (0-0.36)     | 0.12 (0-0.28)    | 0.85 (0.62-0.99) |
| Olfactory R          | 0.21 (0-0.48)     | 0.14 (0-0.34)    | 0.65 (0.47-0.83) | 0.05 (0-0.37)    | 0.14 (0-0.33)    | 0.81 (0.58-1)    | 0.29 (0-0.5)      | 0.01 (0-0.27)    | 0.7 (0.5-0.92)   |
| Frontal Sup Medial L | 0.07 (0-0.45)     | 0.27 (0-0.44)    | 0.66 (0.48-0.83) | 0 (0-0.23)       | 0.08 (0-0.3)     | 0.91 (0.7-1)     | 0.04 (0-0.36)     | 0.16 (0-0.34)    | 0.8 (0.61-0.96)  |
| Frontal Sup Medial R | 0.3 (0.01-0.62)   | 0.17 (0-0.43)    | 0.54 (0.38-0.71) | 0.09 (0-0.34)    | 0.02 (0-0.21)    | 0.89 (0.65-1)    | 0.6 (0.11-0.82)   | 0.11 (0-0.46)    | 0.29 (0.17-0.51) |
| Frontal Inf Orb L    | 0.05 (0-0.44)     | 0.21 (0-0.38)    | 0.74 (0.58-0.92) | 0.02 (0-0.3)     | 0.08 (0-0.31)    | 0.9 (0.67-1)     | 0.02 (0-0.39)     | 0.14 (0-0.35)    | 0.84 (0.6-0.97)  |
| Frontal Med Orb R    | 0.28 (0-0.59)     | 0.12 (0-0.41)    | 0.6 (0.4-0.8)    | 0.02 (0-0.29)    | 0.01 (0-0.16)    | 0.97 (0.7-1)     | 0.37 (0-0.7)      | 0.16 (0-0.5)     | 0.47 (0.28-0.71) |
| Rectus L             | 0.21 (0-0.44)     | 0.04 (0-0.23)    | 0.75 (0.55-0.95) | 0.22 (0-0.48)    | 0.03 (0-0.3)     | 0.75 (0.51-0.98) | 0.05 (0-0.35)     | 0.11 (0-0.26)    | 0.84 (0.61-0.99) |
| Rectus R             | 0.25 (0-0.5)      | 0.03 (0-0.28)    | 0.71 (0.5-0.94)  | 0.01 (0-0.16)    | 0 (0-0.11)       | 0.99 (0.83-1)    | 0.2 (0-0.43)      | 0.03 (0-0.29)    | 0.77 (0.57-0.95) |
| Insula L             | 0.47 (0.09-0.68)  | 0.06 (0-0.28)    | 0.47 (0.3-0.71)  | 0.25 (0-0.55)    | 0.17 (0-0.44)    | 0.58 (0.39-0.82) | 0.22 (0.03-0.48)  | 0.28 (0.05-0.49) | 0.5 (0.35-0.68)  |
| Insula R             | 0.49 (0.09-0.76)  | 0.21 (0-0.5)     | 0.3 (0.19-0.47)  | 0.1 (0-0.61)     | 0.17 (0-0.46)    | 0.5 (0.3-0.7)    | 0.21 (0-0.72)     | 0.45 (0.26-0.65) | 0.45 (0.26-0.65) |
| Cingulum Ant L       | 0.06 (0-0.39)     | 0.2 (0-0.37)     | 0.75 (0.56-0.92) | 0.02 (0-0.21)    | 0.1 (0-0.29)     | 0.88 (0.68-1)    | 0.1 (0-0.38)      | 0.06 (0-0.25)    | 0.84 (0.61-0.99) |
| Cingulum Ant R       | 0.05 (0-0.4)      | 0.35 (0.06-0.49) | 0.6 (0.45-0.74)  | 0.03 (0-0.33)    | 0.16 (0-0.37)    | 0.81 (0.6-1)     | 0.08 (0-0.51)     | 0.26 (0-0.47)    | 0.66 (0.46-0.85) |
| Cingulum Mid L       | 0.26 (0-0.52)     | 0.06 (0-0.34)    | 0.68 (0.48-0.91) | 0.38 (0-0.67)    | 0 (0-0.24)       | 0.62 (0.33-0.97) | 0.25 (0-0.57)     | 0.07 (0-0.38)    | 0.68 (0.43-0.95) |
| Cingulum Mid R       | 0.47 (0-0.76)     | 0.18 (0-0.5)     | 0.35 (0.23-0.56) | 0.06 (0-0.32)    | 0.4 (0.13-0.57)  | 0.54 (0.4-0.71)  | 0.31 (0-0.57)     | 0.13 (0-0.4)     | 0.57 (0.41-0.76) |
| Cingulum Post L      | 0.02 (0-0.24)     | 0.02 (0-0.17)    | 0.96 (0.75-1)    | 0.04 (0-0.27)    | 0.08 (0-0.25)    | 0.88 (0.68-1)    | 0.03 (0-0.3)      | 0.11 (0-0.28)    | 0.86 (0.64-1)    |
| Cingulum Post R      | 0.24 (0-0.49)     | 0.02 (0-0.22)    | 0.74 (0.51-0.98) | 0.16 (0-0.47)    | 0.06 (0-0.36)    | 0.78 (0.53-1)    | 0.28 (0-0.56)     | 0 (0-0.2)        | 0.72 (0.44-1)    |
| ParaHippocampal L    | 0.11 (0-0.32)     | 0 (0-0.12)       | 0.89 (0.68-1)    | 0.41 (0.1-0.63)  | 0 (0-0.26)       | 0.59 (0.37-0.83) | 0.58 (0.25-0.73)  | 0 (0-0.23)       | 0.42 (0.27-0.64) |
| ParaHippocampal R    | 0.1 (0-0.32)      | 0 (0-0.14)       | 0.9 (0.68-1)     | 0.17 (0-0.55)    | 0.08 (0-0.28)    | 0.75 (0.44-0.96) | 0.34 (0-0.6)      | 0.06 (0-0.3)     | 0.61 (0.38-0.91) |
| Calcarine L          | 0.04 (0-0.36)     | 0.27 (0.03-0.43) | 0.69 (0.52-0.85) | 0.43 (0-0.75)    | 0.07 (0-0.47)    | 0.5 (0.24-0.92)  | 0.11 (0-0.42)     | 0.16 (0-0.41)    | 0.72 (0.53-0.93) |
| Calcarine R          | 0.35 (0.07-0.56)  | 0.03 (0-0.19)    | 0.62 (0.43-0.84) | 0.19 (0.02-0.57) | 0.18 (0-0.36)    | 0.63 (0.41-0.84) | 0.14 (0-0.39)     | 0.03 (0-0.18)    | 0.83 (0.59-1)    |
| Cuneus L             | 0.1 (0-0.36)      | 0.03 (0-0.22)    | 0.88 (0.64-1)    | 0 (0-0.22)       | 0 (0-0.17)       | 1 (0.78-1)       | 0.1 (0-0.39)      | 0.02 (0-0.24)    | 0.88 (0.61-1)    |
| Cuneus R             | 0.21 (0-0.48)     | 0.02 (0-0.27)    | 0.77 (0.52-1)    | 0.08 (0-0.37)    | 0.09 (0-0.27)    | 0.83 (0.61-1)    | 0.1 (0-0.3)       | 0.01 (0-0.23)    | 0.89 (0.69-1)    |
| Lingual L            | 0.57 (0.21-0.71)  | 0.01 (0-0.27)    | 0.42 (0.29-0.61) | 0 (0-0.1)        | 0 (0-0.14)       | 0.99 (0.84-1)    | 0.64 (0.28-0.78)  | 0 (0-0.21)       | 0.36 (0.22-0.59) |
| Lingual R            | 0.12 (0-0.49)     | 0.2 (0-0.36)     | 0.68 (0.48-0.84) | 0.03 (0-0.51)    | 0.24 (0-0.45)    | 0.73 (0.46-0.99) | 0.22 (0.05-0.56)  | 0.17 (0.01-0.33) | 0.61 (0.38-0.82) |
| Occipital Sup L      | 0.09 (0-0.4)      | 0.12 (0-0.32)    | 0.79 (0.6-0.97)  | 0.01 (0-0.28)    | 0.05 (0-0.26)    | 0.94 (0.72-1)    | 0.1 (0-0.43)      | 0.12 (0-0.35)    | 0.78 (0.57-0.97) |
| Occipital Sup R      | 0.16 (0-0.53)     | 0.17 (0-0.4)     | 0.67 (0.46-0.88) | 0.04 (0-0.22)    | 0.06 (0-0.23)    | 0.91 (0.73-1)    | 0.14 (0-0.43)     | 0.06 (0-0.27)    | 0.8 (0.56-0.98)  |
| Occipital Mid L      | 0.21 (0-0.57)     | 0.2 (0-0.46)     | 0.59 (0.43-0.79) | 0.04 (0-0.46)    | 0.2 (0-0.44)     | 0.76 (0.5-1)     | 0.24 (0-0.58)     | 0.16 (0-0.46)    | 0.6 (0.42-0.82)  |
| Occipital Mid R      | 0.09 (0-0.37)     | 0.42 (0.18-0.57) | 0.5 (0.36-0.64)  | 0.03 (0-0.35)    | 0.15 (0.02-0.34) | 0.82 (0.55-0.95) | 0.22 (0.01-0.5)   | 0.24 (0.04-0.47) | 0.54 (0.38-0.71) |
| Occipital Inf L      | 0.11 (0-0.36)     | 0.09 (0-0.26)    | 0.8 (0.63-0.94)  | 0.05 (0-0.22)    | 0.03 (0-0.17)    | 0.91 (0.77-1)    | 0.21 (0-0.59)     | 0.18 (0-0.46)    | 0.61 (0.4-0.85)  |
| Occipital Inf R      | 0.17 (0-0.44)     | 0.06 (0-0.28)    | 0.77 (0.55-0.97) | 0.07 (0-0.39)    | 0.16 (0-0.39)    | 0.76 (0.53-1)    | 0.05 (0-0.29)     | 0.12 (0-0.31)    | 0.82 (0.64-1)    |
| Fusiform L           | 0.35 (0-0.52)     | 0 (0-0.31)       | 0.65 (0.48-0.84) | 0.03 (0-0.2)     | 0.01 (0-0.14)    | 0.96 (0.79-1)    | 0.48 (0-0.68)     | 0 (0-0.39)       | 0.51 (0.32-0.78) |
| Fusiform R           | 0.47 (0.19-0.62)  | 0 (0-0.2)        | 0.53 (0.38-0.71) | 0.06 (0-0.31)    | 0.06 (0-0.3)     | 0.88 (0.61-1)    | 0.63 (0.27-0.77)  | 0.02 (0-0.3)     | 0.34 (0.23-0.52) |
| Postcentral L        | 0.44 (0.02-0.71)  | 0.13 (0-0.41)    | 0.43 (0.26-0.68) | 0 (0-0.26)       | 0.02 (0-0.19)    | 0.98 (0.73-1)    | 0.42 (0.02-0.7)   | 0.18 (0-0.47)    | 0.4 (0.26-0.6)   |
| Postcentral R        | 0.42 (0.11-0.62)  | 0.09 (0-0.36)    | 0.49 (0.36-0.66) | 0.08 (0-0.24)    | 0.07 (0-0.22)    | 0.85 (0.69-0.99) | 0.72 (0.32-0.83)  | 0.01 (0-0.31)    | 0.27 (0.17-0.45) |
| Parietal Sup L       | 0.07 (0-0.32)     | 0.08 (0-0.27)    | 0.85 (0.65-0.99) | 0.02 (0-0.18)    | 0.1 (0.01-0.24)  | 0.89 (0.72-0.98) | 0.03 (0-0.22)     | 0 (0-0.18)       | 0.96 (0.78-1)    |
| Parietal Sup R       | 0.28 (0.06-0.49)  | 0.14 (0.01-0.36) | 0.57 (0.44-0.73) | 0.14 (0-0.49)    | 0.12 (0-0.4)     | 0.74 (0.49-0.99) | 0.39 (0.06-0.58)  | 0.06 (0-0.34)    | 0.56 (0.4-0.75)  |
| Parietal Inf L       | 0.3 (0-0.56)      | 0.09 (0-0.38)    | 0.61 (0.43-0.83) | 0.04 (0-0.33)    | 0.19 (0.01-0.42) | 0.77 (0.53-0.98) | 0.33 (0-0.59)     | 0.07 (0-0.43)    | 0.6 (0.41-0.84)  |
| Parietal Inf R       | 0.02 (0-0.26)     | 0.27 (0.09-0.4)  | 0.7 (0.57-0.83)  | 0.17 (0-0.41)    | 0.15 (0.01-0.41) | 0.68 (0.51-0.84) | 0.13 (0-0.48)     | 0.46 (0.16-0.63) | 0.41 (0.29-0.54) |
| SupraMarginal L      | 0.35 (0-0.62)     | 0.09 (0-0.43)    | 0.56 (0.38-0.8)  | 0.1 (0-0.37)     | 0.16 (0-0.4)     | 0.74 (0.55-0.95) | 0.14 (0-0.42)     | 0.14 (0-0.37)    | 0.71 (0.52-0.9)  |
| SupraMarginal R      | 0.17 (0-0.52)     | 0.22 (0-0.43)    | 0.61 (0.45-0.79) | 0.12 (0-0.49)    | 0.15 (0-0.43)    | 0.73 (0.5-0.97)  | 0.3 (0-0.72)      | 0.3 (0-0.61)     | 0.4 (0.25-0.61)  |
| Angular L            | 0.24 (0-0.48)     | 0.09 (0-0.31)    | 0.67 (0.49-0.87) | 0.02 (0-0.15)    | 0.04 (0-0.17)    | 0.94 (0.8-1)     | 0.16 (0-0.43)     | 0.16 (0-0.35)    | 0.69 (0.51-0.87) |
| Angular R            | 0.02 (0-0.26)     | 0.12 (0-0.26)    | 0.86 (0.68-0.99) | 0.01 (0-0.27)    | 0.01 (0-0.17)    | 0.98 (0.73-1)    | 0.06 (0-0.28)     | 0.1 (0-0.27)     | 0.84 (0.65-1)    |
| Precuneus L          | 0.06 (0-0.38)     | 0.21 (0.01-0.34) | 0.72 (0.54-0.88) | 0.04 (0-0.35)    | 0.15 (0-0.35)    | 0.81 (0.62-0.99) | 0.14 (0.03-0.37)  | 0.22 (0.05-0.37) | 0.64 (0.47-0.81) |
| Precuneus R          | 0.28 (0-0.59)     | 0.1 (0-0.33)     | 0.62 (0.39-0.85) | 0.02 (0-0.49)    | 0.24 (0-0.42)    | 0.74 (0.49-0.94) | 0.36 (0.04-0.56)  | 0.01 (0-0.27)    | 0.62 (0.44-0.84) |
| Paracentral Lobule L | 0.28 (0.01-0.49)  | 0.04 (0-0.27)    | 0.68 (0.51-0.88) | 0.02 (0-0.2)     | 0.07 (0-0.23)    | 0.92 (0.74-1)    | 0.18 (0-0.46)     | 0.14 (0-0.37)    | 0.68 (0.52-0.87) |
| Paracentral Lobule R | 0.25 (0-0.46)     | 0 (0-0.2)        | 0.75 (0.54-0.95) | 0.02 (0-0.26)    | 0.06 (0-0.25)    | 0.91 (0.74-1)    | 0.13 (0-0.35)     | 0.02 (0-0.18)    | 0.85 (0.64-0.97) |
| Heschl L             | 0.06 (0-0.27)     | 0.16 (0-0.32)    | 0.78 (0.6-0.96)  | 0.19 (0-0.42)    | 0.02 (0-0.28)    | 0.79 (0.57-1)    | 0.14 (0-0.43)     | 0.07 (0-0.26)    | 0.79 (0.53-1)    |
| Heschl R             | 0.13 (0-0.3)      | 0 (0-0.21)       | 0.87 (0.7-0.99)  | 0.07 (0-0.24)    | 0 (0-0.15)       | 0.93 (0.76-1)    | 0.4 (0-0.61)      | 0 (0-0.38)       | 0.6 (0.39-0.9)   |
| Temporal Sup L       | 0.28 (0-0.55)     | 0.11 (0-0.43)    | 0.61 (0.44-0.82) | 0.01 (0-0.4)     | 0.37 (0.01-0.53) | 0.63 (0.46-0.82) | 0.34 (0-0.6)      | 0.07 (0-0.46)    | 0.58 (0.4-0.82)  |
| Temporal Sup R       | 0.35 (0-0.66)     | 0.2 (0-0.51)     | 0.45 (0.32-0.63) | 0.03 (0-0.36)    | 0.25 (0-0.44)    | 0.72 (0.54-0.93) | 0.43 (0-0.73)     | 0.18 (0-0.53)    | 0.4 (0.24-0.62)  |
| Temporal Pole Sup L  | 0.06 (0-0.21)     | 0.01 (0-0.09)    | 0.94 (0.78-0.99) | 0.4 (0.01-0.67)  | 0.03 (0-0.29)    | 0.57 (0.33-0.86) | 0.16 (0-0.42)     | 0.05 (0-0.26)    | 0.79 (0.57-0.97) |
| Temporal Pole Sup R  | 0.42 (0-0.64)     | 0.03 (0-0.34)    | 0.55 (0.35-0.83) | 0.25 (0-0.51)    | 0 (0-0.28)       | 0.75 (0.49-1)    | 0.42 (0-0.68)     | 0.06 (0-0.43)    | 0.52 (0.31-0.81) |
| Temporal Mid L       | 0.18 (0-0.49)     | 0.17 (0-0.41)    | 0.65 (0.48-0.83) | 0.2 (0-0.45)     | 0.06 (0-0.31)    | 0.74 (0.52-0.97) | 0.35 (0-0.6)      | 0.08 (0-0.45)    | 0.57 (0.39-0.79) |
| Temporal Mid R       | 0.2 (0-0.54)      | 0.41 (0.1-0.62)  | 0.39 (0.28-0.54) | 0.11 (0-0.37)    | 0.23 (0.02-0.46) | 0.67 (0.49-0.87) | 0.38 (0-0.        |                  |                  |

Table S7: Heritability of longitudinal change in regional CT controlling for average CT

|                      | Neonate to 1-year |                  |                  | 1-year to 2-year |                  |                  | Neonate to 2-year |                  |                  |
|----------------------|-------------------|------------------|------------------|------------------|------------------|------------------|-------------------|------------------|------------------|
|                      | $a_{\Delta}^2$    | $c_{\Delta}^2$   | $e_{\Delta}^2$   | $a_{\Delta}^2$   | $c_{\Delta}^2$   | $e_{\Delta}^2$   | $a_{\Delta}^2$    | $c_{\Delta}^2$   | $e_{\Delta}^2$   |
| Precentral L         | 0.01 (0-0.2)      | 0.1 (0-0.26)     | 0.89 (0.74-0.99) | 0 (0-0.25)       | 0.05 (0-0.22)    | 0.95 (0.75-1)    | 0.01 (0-0.2)      | 0.21 (0-0.37)    | 0.79 (0.62-0.95) |
| Precentral R         | 0.15 (0-0.32)     | 0 (0-0.18)       | 0.85 (0.68-0.97) | 0.21 (0-0.5)     | 0 (0-0.19)       | 0.79 (0.5-0.98)  | 0.44 (0.01-0.62)  | 0 (0-0.28)       | 0.56 (0.38-0.78) |
| Frontal Sup L        | 0.05 (0-0.36)     | 0.22 (0-0.39)    | 0.73 (0.57-0.88) | 0 (0-0.17)       | 0.02 (0-0.2)     | 0.98 (0.8-1)     | 0.03 (0-0.43)     | 0.33 (0-0.5)     | 0.64 (0.47-0.83) |
| Frontal Sup R        | 0.33 (0-0.59)     | 0.09 (0-0.33)    | 0.58 (0.4-0.79)  | 0.05 (0-0.47)    | 0.24 (0-0.47)    | 0.71 (0.48-0.94) | 0.42 (0.03-0.67)  | 0.12 (0-0.39)    | 0.46 (0.29-0.7)  |
| Frontal Sup Orb L    | 0.05 (0-0.32)     | 0.06 (0-0.23)    | 0.89 (0.68-1)    | 0.01 (0-0.25)    | 0.1 (0-0.27)     | 0.89 (0.68-0.98) | 0.03 (0-0.24)     | 0.08 (0-0.24)    | 0.89 (0.71-1)    |
| Frontal Sup Orb R    | 0.18 (0-0.37)     | 0 (0-0.2)        | 0.82 (0.63-1)    | 0 (0-0.13)       | 0 (0-0.08)       | 1 (0.87-1)       | 0.15 (0-0.35)     | 0 (0-0.21)       | 0.85 (0.64-1)    |
| Frontal Mid L        | 0 (0-0.29)        | 0.19 (0-0.32)    | 0.8 (0.64-0.93)  | 0.01 (0-0.3)     | 0.13 (0-0.35)    | 0.86 (0.65-1)    | 0.01 (0-0.3)      | 0.26 (0.03-0.41) | 0.73 (0.56-0.89) |
| Frontal Mid R        | 0.38 (0-0.56)     | 0.01 (0-0.36)    | 0.61 (0.44-0.83) | 0.07 (0-0.35)    | 0.08 (0-0.33)    | 0.85 (0.62-1)    | 0.26 (0-0.45)     | 0.01 (0-0.29)    | 0.73 (0.55-0.93) |
| Frontal Mid Orb L    | 0.11 (0-0.34)     | 0.03 (0-0.24)    | 0.86 (0.66-0.99) | 0.17 (0-0.47)    | 0.05 (0-0.34)    | 0.77 (0.53-0.98) | 0 (0-0.15)        | 0 (0-0.13)       | 1 (0.85-1)       |
| Frontal Mid Orb R    | 0.19 (0-0.41)     | 0.04 (0-0.27)    | 0.77 (0.58-0.96) | 0.03 (0-0.22)    | 0.04 (0-0.22)    | 0.93 (0.75-1)    | 0.09 (0-0.28)     | 0 (0-0.16)       | 0.91 (0.72-1)    |
| Frontal Inf Oper L   | 0.13 (0-0.33)     | 0.03 (0-0.23)    | 0.84 (0.67-0.99) | 0.09 (0-0.34)    | 0.04 (0-0.25)    | 0.87 (0.66-1)    | 0.15 (0-0.47)     | 0.11 (0-0.39)    | 0.74 (0.53-0.95) |
| Frontal Inf Oper R   | 0.15 (0-0.36)     | 0.05 (0-0.23)    | 0.8 (0.62-0.97)  | 0.15 (0-0.41)    | 0.02 (0-0.22)    | 0.82 (0.57-1)    | 0.01 (0-0.22)     | 0.1 (0-0.34)     | 0.73 (0.56-0.89) |
| Frontal Inf Tri L    | 0.24 (0-0.43)     | 0 (0-0.22)       | 0.75 (0.57-0.95) | 0.03 (0-0.27)    | 0.01 (0-0.21)    | 0.96 (0.73-1)    | 0.25 (0-0.45)     | 0.01 (0-0.3)     | 0.74 (0.55-0.94) |
| Frontal Inf Tri R    | 0.26 (0.01-0.45)  | 0.01 (0-0.2)     | 0.73 (0.55-0.92) | 0 (0-0.31)       | 0.04 (0-0.25)    | 0.96 (0.69-1)    | 0.2 (0-0.48)      | 0 (0-0.16)       | 0.8 (0.52-0.98)  |
| Frontal Inf Orb L    | 0.17 (0-0.53)     | 0.18 (0-0.42)    | 0.65 (0.46-0.85) | 0.21 (0-0.5)     | 0.04 (0-0.29)    | 0.76 (0.5-0.99)  | 0.01 (0-0.34)     | 0.17 (0-0.33)    | 0.82 (0.65-0.96) |
| Frontal Inf Orb R    | 0.09 (0-0.28)     | 0 (0-0.18)       | 0.9 (0.72-1)     | 0 (0-0.16)       | 0.06 (0-0.2)     | 0.94 (0.79-1)    | 0.11 (0-0.39)     | 0.05 (0-0.27)    | 0.83 (0.59-1)    |
| Rolandic Oper L      | 0.05 (0-0.3)      | 0.01 (0-0.17)    | 0.93 (0.7-1)     | 0.53 (0.05-0.74) | 0.03 (0-0.33)    | 0.43 (0.25-0.75) | 0.28 (0.03-0.57)  | 0.09 (0-0.31)    | 0.64 (0.43-0.84) |
| Rolandic Oper R      | 0.09 (0-0.28)     | 0 (0-0.18)       | 0.9 (0.72-0.99)  | 0.38 (0.05-0.6)  | 0 (0-0.21)       | 0.62 (0.4-0.88)  | 0.3 (0.02-0.5)    | 0 (0-0.26)       | 0.7 (0.5-0.89)   |
| Supp Motor Area L    | 0.02 (0-0.3)      | 0.06 (0-0.22)    | 0.92 (0.7-1)     | 0.06 (0-0.44)    | 0.23 (0-0.43)    | 0.71 (0.51-0.91) | 0.04 (0-0.35)     | 0.11 (0-0.3)     | 0.85 (0.64-1)    |
| Supp Motor Area R    | 0.2 (0-0.43)      | 0.07 (0-0.27)    | 0.73 (0.55-0.91) | 0.14 (0-0.42)    | 0.04 (0-0.32)    | 0.82 (0.57-1)    | 0.2 (0-0.46)      | 0.08 (0-0.35)    | 0.72 (0.53-0.92) |
| Olfactory L          | 0.14 (0-0.32)     | 0.03 (0-0.24)    | 0.83 (0.66-1)    | 0.3 (0.05-0.54)  | 0.08 (0-0.28)    | 0.62 (0.41-0.87) | 0.2 (0-0.4)       | 0 (0-0.27)       | 0.8 (0.6-1)      |
| Olfactory R          | 0.43 (0.12-0.61)  | 0 (0-0.2)        | 0.57 (0.39-0.77) | 0.04 (0-0.24)    | 0.05 (0-0.19)    | 0.91 (0.71-1)    | 0.27 (0.03-0.51)  | 0.04 (0-0.21)    | 0.69 (0.48-0.88) |
| Frontal Sup Medial L | 0.38 (0.11-0.55)  | 0 (0-0.2)        | 0.62 (0.45-0.8)  | 0.33 (0-0.55)    | 0.01 (0-0.36)    | 0.66 (0.45-0.91) | 0.29 (0.02-0.48)  | 0 (0-0.23)       | 0.71 (0.52-0.91) |
| Frontal Sup Medial R | 0.48 (0.06-0.62)  | 0 (0-0.3)        | 0.52 (0.38-0.72) | 0.52 (0.14-0.71) | 0 (0-0.24)       | 0.48 (0.29-0.72) | 0.22 (0-0.43)     | 0 (0-0.2)        | 0.78 (0.57-0.97) |
| Frontal Med Orb L    | 0.25 (0.01-0.45)  | 0.03 (0-0.22)    | 0.73 (0.55-0.92) | 0.07 (0-0.28)    | 0.07 (0-0.25)    | 0.86 (0.68-0.99) | 0.1 (0-0.24)      | 0 (0-0.09)       | 0.9 (0.76-0.99)  |
| Frontal Med Orb R    | 0.11 (0-0.52)     | 0.24 (0-0.43)    | 0.65 (0.47-0.83) | 0.08 (0-0.43)    | 0.15 (0-0.37)    | 0.76 (0.55-0.93) | 0.06 (0-0.27)     | 0.05 (0-0.22)    | 0.89 (0.73-0.98) |
| Rectus L             | 0.28 (0.02-0.46)  | 0.02 (0-0.22)    | 0.7 (0.54-0.88)  | 0.03 (0-0.34)    | 0.1 (0-0.29)     | 0.88 (0.66-1)    | 0.17 (0.01-0.38)  | 0.01 (0-0.16)    | 0.81 (0.62-0.98) |
| Rectus R             | 0.27 (0-0.51)     | 0.06 (0-0.29)    | 0.67 (0.47-0.89) | 0.39 (0.01-0.61) | 0 (0-0.25)       | 0.6 (0.39-0.89)  | 0.21 (0-0.55)     | 0.11 (0-0.41)    | 0.68 (0.42-0.97) |
| Insula L             | 0.35 (0.04-0.56)  | 0.01 (0-0.17)    | 0.64 (0.44-0.88) | 0.24 (0-0.56)    | 0.19 (0-0.42)    | 0.57 (0.36-0.81) | 0.09 (0-0.43)     | 0.24 (0-0.44)    | 0.68 (0.47-0.89) |
| Insula R             | 0.37 (0-0.6)      | 0.04 (0-0.28)    | 0.59 (0.4-0.83)  | 0.06 (0-0.41)    | 0.18 (0-0.4)     | 0.76 (0.56-0.97) | 0.3 (0.01-0.59)   | 0.09 (0-0.29)    | 0.62 (0.39-0.86) |
| Cingulum Ant L       | 0.22 (0-0.41)     | 0.03 (0-0.29)    | 0.75 (0.58-0.94) | 0.01 (0-0.16)    | 0 (0-0.12)       | 0.99 (0.84-1)    | 0.21 (0-0.45)     | 0.05 (0-0.35)    | 0.74 (0.54-0.93) |
| Cingulum Ant R       | 0.21 (0-0.43)     | 0.08 (0-0.3)     | 0.71 (0.55-0.87) | 0.01 (0-0.3)     | 0.08 (0-0.28)    | 0.91 (0.7-1)     | 0.15 (0-0.42)     | 0.15 (0-0.38)    | 0.7 (0.53-0.88)  |
| Cingulum Mid L       | 0.42 (0.13-0.61)  | 0.02 (0-0.2)     | 0.57 (0.39-0.77) | 0 (0-0.49)       | 0.39 (0-0.56)    | 0.61 (0.43-0.83) | 0.38 (0.08-0.62)  | 0.1 (0-0.34)     | 0.52 (0.35-0.73) |
| Cingulum Mid R       | 0.16 (0-0.42)     | 0.16 (0.01-0.34) | 0.68 (0.5-0.86)  | 0.07 (0-0.39)    | 0.1 (0-0.33)     | 0.83 (0.6-0.99)  | 0.03 (0-0.32)     | 0.11 (0-0.28)    | 0.86 (0.65-1)    |
| Cingulum Post L      | 0.14 (0.02-0.3)   | 0 (0-0.15)       | 0.86 (0.7-0.97)  | 0.04 (0-0.19)    | 0 (0-0.12)       | 0.96 (0.81-1)    | 0.22 (0.05-0.4)   | 0 (0-0.18)       | 0.78 (0.6-0.92)  |
| Cingulum Post R      | 0.13 (0.02-0.34)  | 0.02 (0-0.13)    | 0.86 (0.65-0.97) | 0.26 (0.03-0.58) | 0.1 (0-0.31)     | 0.65 (0.41-0.86) | 0.45 (0.18-0.67)  | 0.11 (0-0.32)    | 0.44 (0.3-0.63)  |
| ParaHippocampal L    | 0.33 (0.03-0.59)  | 0.08 (0-0.3)     | 0.6 (0.41-0.8)   | 0.02 (0-0.27)    | 0.07 (0-0.25)    | 0.91 (0.69-1)    | 0.38 (0.09-0.59)  | 0 (0-0.16)       | 0.62 (0.41-0.85) |
| ParaHippocampal R    | 0 (0-0.2)         | 0.06 (0-0.19)    | 0.94 (0.76-1)    | 0.18 (0-0.47)    | 0.03 (0-0.27)    | 0.79 (0.53-1)    | 0.08 (0-0.39)     | 0.14 (0-0.35)    | 0.77 (0.58-0.96) |
| Calcarine L          | 0.21 (0.06-0.4)   | 0 (0-0.14)       | 0.78 (0.59-0.94) | 0.15 (0-0.37)    | 0 (0-0.21)       | 0.85 (0.62-1)    | 0.41 (0.13-0.61)  | 0 (0-0.15)       | 0.59 (0.39-0.83) |
| Calcarine R          | 0.42 (0.12-0.6)   | 0.03 (0-0.23)    | 0.55 (0.39-0.74) | 0.28 (0.03-0.57) | 0.21 (0.03-0.44) | 0.52 (0.31-0.78) | 0.11 (0-0.38)     | 0.25 (0.04-0.44) | 0.64 (0.48-0.81) |
| Cuneus L             | 0 (0-0.19)        | 0.07 (0-0.19)    | 0.93 (0.8-1)     | 0 (0-0.21)       | 0.02 (0-0.16)    | 0.98 (0.79-1)    | 0 (0-0.28)        | 0.12 (0-0.28)    | 0.88 (0.7-1)     |
| Cuneus R             | 0.32 (0-0.61)     | 0.12 (0-0.41)    | 0.57 (0.39-0.8)  | 0.31 (0-0.55)    | 0 (0-0.32)       | 0.69 (0.45-0.96) | 0.09 (0-0.39)     | 0.13 (0-0.35)    | 0.78 (0.6-0.94)  |
| Lingual L            | 0.11 (0-0.35)     | 0.12 (0-0.27)    | 0.77 (0.55-0.94) | 0.01 (0-0.25)    | 0.07 (0-0.26)    | 0.92 (0.7-1)     | 0.05 (0-0.24)     | 0.19 (0-0.37)    | 0.76 (0.59-0.93) |
| Lingual R            | 0.09 (0-0.52)     | 0.34 (0.01-0.5)  | 0.57 (0.43-0.71) | 0 (0-0.35)       | 0.11 (0-0.32)    | 0.89 (0.65-1)    | 0.08 (0-0.52)     | 0.3 (0-0.48)     | 0.62 (0.45-0.79) |
| Occipital Sup L      | 0.01 (0-0.35)     | 0.34 (0.04-0.48) | 0.64 (0.51-0.79) | 0.1 (0-0.38)     | 0.04 (0-0.32)    | 0.87 (0.6-1)     | 0.11 (0-0.44)     | 0.22 (0-0.45)    | 0.67 (0.51-0.84) |
| Occipital Sup R      | 0.15 (0-0.47)     | 0.14 (0-0.34)    | 0.71 (0.52-0.87) | 0.05 (0-0.36)    | 0.16 (0-0.37)    | 0.78 (0.59-0.98) | 0.3 (0.07-0.5)    | 0.04 (0-0.28)    | 0.66 (0.5-0.83)  |
| Occipital Mid L      | 0.05 (0-0.42)     | 0.27 (0-0.43)    | 0.68 (0.53-0.84) | 0.11 (0-0.37)    | 0.04 (0-0.28)    | 0.85 (0.63-1)    | 0.1 (0-0.46)      | 0.24 (0-0.45)    | 0.66 (0.49-0.83) |
| Occipital Mid R      | 0.11 (0-0.34)     | 0.07 (0-0.23)    | 0.82 (0.63-0.99) | 0.1 (0-0.42)     | 0.17 (0-0.43)    | 0.73 (0.52-0.96) | 0.23 (0-0.42)     | 0 (0-0.24)       | 0.77 (0.57-0.97) |
| Occipital Inf L      | 0.1 (0-0.31)      | 0 (0-0.14)       | 0.9 (0.69-1)     | 0.24 (0-0.45)    | 0 (0-0.26)       | 0.76 (0.55-0.96) | 0 (0-0.23)        | 0 (0-0.11)       | 1 (0.77-1)       |
| Occipital Inf R      | 0.18 (0-0.48)     | 0.14 (0-0.34)    | 0.68 (0.5-0.87)  | 0.25 (0-0.54)    | 0.03 (0-0.41)    | 0.72 (0.46-1)    | 0.29 (0.01-0.51)  | 0.07 (0-0.32)    | 0.64 (0.47-0.83) |
| Fusiform L           | 0.05 (0-0.33)     | 0.24 (0.01-0.39) | 0.71 (0.56-0.85) | 0.15 (0-0.4)     | 0 (0-0.25)       | 0.84 (0.6-1)     | 0.17 (0-0.56)     | 0.27 (0-0.51)    | 0.56 (0.38-0.75) |
| Fusiform R           | 0.02 (0-0.41)     | 0.29 (0-0.43)    | 0.7 (0.52-0.84)  | 0.12 (0-0.46)    | 0.03 (0-0.25)    | 0.85 (0.52-1)    | 0.12 (0-0.47)     | 0.17 (0-0.36)    | 0.72 (0.48-0.92) |
| Postcentral L        | 0.38 (0-0.59)     | 0.06 (0-0.36)    | 0.55 (0.39-0.75) | 0.04 (0-0.18)    | 0 (0-0.13)       | 0.95 (0.79-1)    | 0.3 (0-0.52)      | 0.08 (0-0.36)    | 0.61 (0.46-0.79) |
| Postcentral R        | 0.14 (0-0.44)     | 0.15 (0-0.37)    | 0.71 (0.54-0.88) | 0.04 (0-0.48)    | 0.17 (0-0.38)    | 0.8 (0.53-1)     | 0.24 (0-0.45)     | 0.03 (0-0.26)    | 0.73 (0.54-0.93) |
| Parietal Sup L       | 0.33 (0-0.57)     | 0.08 (0-0.41)    | 0.59 (0.42-0.79) | 0.1 (0-0.39)     | 0.05 (0-0.3)     | 0.86 (0.61-1)    | 0.2 (0-0.5)       | 0.12 (0-0.38)    | 0.68 (0.5-0.88)  |
| Parietal Sup R       | 0.21 (0.03-0.41)  | 0.1 (0-0.27)     | 0.68 (0.53-0.85) | 0.13 (0-0.48)    | 0.23 (0.01-0.42) | 0.65 (0.42-0.9)  | 0.07 (0-0.28)     | 0.36 (0.15-0.52) | 0.57 (0.44-0.72) |
| Parietal Inf L       | 0.31 (0-0.5)      | 0.01 (0-0.26)    | 0.68 (0.5-0.88)  | 0.1 (0-0.45)     | 0.07 (0-0.32)    | 0.84 (0.55-1)    | 0.38 (0.01-0.56)  | 0 (0-0.26)       | 0.62 (0.44-0.83) |
| Parietal Inf R       | 0.01 (0-0.15)     | 0 (0-0.11)       | 0.99 (0.84-1)    | 0.02 (0-0.36)    | 0.16 (0-0.37)    | 0.82 (0.61-1)    | 0 (0-0.33)        | 0.11 (0-0.26)    | 0.89 (0.67-1)    |
| SupraMarginal L      | 0.23 (0-0.43)     | 0.01 (0-0.18)    | 0.76 (0.57-0.96) | 0.01 (0-0.32)    | 0.07 (0-0.26)    | 0.92 (0.67-1)    | 0.17 (0-0.37)     | 0.01 (0-0.18)    | 0.82 (0.63-0.98) |
| SupraMarginal R      | 0.38 (0.01-0.57)  | 0.03 (0-0.3)     | 0.6 (0.43-0.8)   | 0.15 (0-0.38)    | 0.04 (0-0.32)    | 0.82 (0.6-1)     | 0.48 (0.05-0.72)  | 0.08 (0-0.4)     | 0.44 (0.28-0.66) |
| Angular L            | 0.03 (0-0.23)     | 0.05 (0-0.17)    | 0.93 (0.76-1)    | 0.09 (0-0.43)    | 0.05 (0-0.3)     | 0.86 (0.57-1)    | 0 (0-0.18)        | 0.07 (0-0.19)    | 0.93 (0.79-1)    |
| Angular R            | 0.14 (0-0.29)     | 0.01 (0-0.17)    | 0.85 (0.7-0.97)  | 0.48 (0.01-0.67) | 0 (0-0.34)       | 0.51 (0.33-0.75) | 0.03 (0-0.14)     | 0.01 (0-0.1)     | 0.96 (0.86-1)    |
| Precuneus L          | 0.1 (0-0.37)      | 0.08 (0-0.3)     | 0.82 (0.63-0.99) | 0 (0-0.15)       | 0 (0-0.16)       | 1 (0.83-1)       | 0.09 (0-0.35)     | 0.06 (0-0.27)    | 0.85 (0.65-1)    |
| Precuneus R          | 0.32 (0.01-0.53)  | 0.02 (0-0.25)    | 0.66 (0.47-0.89) | 0.1 (0-0.51)     | 0.12 (0-0.34)    | 0.77 (0.49-0.99) | 0.11 (0-0.36)     | 0.02 (0-0.2)     | 0.88 (0.64-1)    |
| Paracentral Lobule L | 0.1 (0-0.44)      | 0.15 (0-0.35)    | 0.75 (0.55-0.94) | 0.02 (0-0.28)    | 0.09 (0-0.28)    | 0.89 (0.69-1)    | 0.16 (0-0.49)     | 0.07 (0-0.33)    | 0.77 (0.51-0.99) |
| Paracentral Lobule R | 0.13 (0-0.35)     | 0.04 (0-0.25)    | 0.83 (0.64-0.99) | 0.03 (0-0.29)    | 0.08 (0-0.29)    | 0.89 (0.68-1)    | 0.2 (0-0.4)       | 0 (0-0.25)       | 0.8 (0.6-1)      |
| Heschl L             | 0.03 (0-0.16)     | 0 (0-0.1)        | 0.96 (0.84-1)    | 0.08 (0-0.38)    | 0.11 (0-0.29)    | 0.81 (0.62-0.96) | 0.01 (0-0.38)     | 0.15 (0-0.32)    | 0.85 (0.62-0.99) |
| Heschl R             | 0.22 (0.02-0.4)   | 0.02 (0-0.18)    | 0.77 (0.59-0.94) | 0.37 (0-0.64)    | 0.05 (0-0.36)    | 0.58 (0.36-0.86) | 0.21 (0-0.46)     | 0.01 (0-0.23)    | 0.78 (0.54-0.99) |
| Temporal Sup L       | 0.05 (0-0.29)     | 0.03 (0-0.21)    | 0.92 (0.71-1)    | 0.16 (0-0.38)    | 0 (0-0.26)       | 0.83 (0.62-0.97) | 0.24 (0-0.5)      | 0.03 (0-0.35)    | 0.73 (0.5-0.97)  |
| Temporal Sup R       | 0.37 (0.06-0.55)  | 0 (0-0.21)       | 0.63 (0.45-0.84) | 0.01 (0-0.37)    | 0.09 (0-0.29)    | 0.9 (0.63-1)     | 0.34 (0.03-0.56)  | 0.02 (0-0.28)    | 0.63 (0.43-0.87) |
| Temporal Pole Sup L  | 0.1 (0-0.38)      | 0.06 (0-0.25)    | 0.84 (0.62-1)    | 0.02 (0-0.53)    | 0.2 (0-0.41)     | 0.78 (0.47-0.99) | 0.16 (0-0.51)     | 0.12 (0-0.35)    | 0.71 (0.49-0.92) |
| Temporal Pole Sup R  | 0.04 (0-0.22)     | 0.03 (0-0.14)    | 0.93 (0.77-1)    | 0.01 (0-0.42)    | 0.19 (0-0.36)    | 0.8 (0.56-0.95)  | 0.07 (0-0.5)      | 0.24 (0-0.41)    | 0.69 (0.49-0.86) |
| Temporal Mid L       | 0.16 (0-0.36)     | 0 (0-0.23)       | 0.84 (0.64-1)    | 0.35 (0-0.57)    | 0 (0-0.34)       | 0.65 (0.43-0.92) | 0.38 (0-0.56)     | 0 (0-0.36)       | 0.62 (0.44-0.84) |
| Temporal Mid R       | 0.12 (0-0.32)     | 0.03 (0-0.25)    | 0.84 (0.68-0.96) | 0.1 (0-0.38)     | 0.1 (0-0.3)      | 0.8 (0.59-0.97)  | 0.27 (0-0.57)     | 0.11 (0-0.41)    | 0.61 (0.42-0.83) |
| Temporal Pole Mid L  | 0.04 (0-0.29)     | 0.05 (0-0.2)     | 0.91 (0.7-1)     | 0.02 (0-0.35)    | 0.07 (0-0.26)    | 0.91 (0.64-1)    | 0 (0              |                  |                  |

Table S8: Heritability of longitudinal change in regional SA controlling for total SA

|                      | Neonate to 1-year |                  |                  | 1-year to 2-year |                  |                  | Neonate to 2-year |                  |                  |
|----------------------|-------------------|------------------|------------------|------------------|------------------|------------------|-------------------|------------------|------------------|
|                      | $a^2_{\Delta}$    | $c^2_{\Delta}$   | $e^2_{\Delta}$   | $a^2_{\Delta}$   | $c^2_{\Delta}$   | $e^2_{\Delta}$   | $a^2_{\Delta}$    | $c^2_{\Delta}$   | $e^2_{\Delta}$   |
| Precentral L         | 0.21 (0-0.47)     | 0.05 (0-0.28)    | 0.74 (0.53-0.95) | 0 (0-0.1)        | 0 (0-0.09)       | 1 (0.9-1)        | 0.23 (0-0.46)     | 0.05 (0-0.32)    | 0.73 (0.54-0.94) |
| Precentral R         | 0.05 (0-0.33)     | 0.09 (0-0.25)    | 0.86 (0.65-0.99) | 0.22 (0-0.47)    | 0.08 (0-0.36)    | 0.71 (0.52-0.91) | 0.05 (0-0.43)     | 0.2 (0-0.38)     | 0.74 (0.56-0.91) |
| Frontal Sup L        | 0.05 (0-0.39)     | 0.09 (0-0.28)    | 0.86 (0.6-1)     | 0 (0-0.23)       | 0.07 (0-0.24)    | 0.93 (0.76-1)    | 0.06 (0-0.28)     | 0.01 (0-0.2)     | 0.93 (0.7-1)     |
| Frontal Sup R        | 0.05 (0-0.31)     | 0.12 (0-0.26)    | 0.84 (0.68-0.95) | 0.09 (0-0.33)    | 0.11 (0-0.33)    | 0.8 (0.64-0.94)  | 0.16 (0-0.65)     | 0.33 (0-0.59)    | 0.51 (0.34-0.72) |
| Frontal Sup Orb L    | 0.04 (0-0.38)     | 0.15 (0-0.3)     | 0.81 (0.59-0.95) | 0.01 (0-0.33)    | 0.25 (0-0.42)    | 0.74 (0.55-0.91) | 0.02 (0-0.23)     | 0 (0-0.16)       | 0.98 (0.76-1)    |
| Frontal Sup Orb R    | 0.28 (0-0.47)     | 0 (0-0.26)       | 0.72 (0.53-0.9)  | 0.04 (0-0.24)    | 0 (0-0.13)       | 0.96 (0.76-1)    | 0.19 (0-0.37)     | 0 (0-0.21)       | 0.81 (0.63-0.96) |
| Frontal Mid L        | 0.17 (0.01-0.34)  | 0.01 (0-0.19)    | 0.82 (0.64-0.97) | 0.09 (0-0.29)    | 0.05 (0-0.26)    | 0.86 (0.67-0.99) | 0.43 (0.06-0.63)  | 0.01 (0-0.25)    | 0.56 (0.37-0.8)  |
| Frontal Mid R        | 0.18 (0.03-0.37)  | 0.01 (0-0.14)    | 0.81 (0.63-0.93) | 0.15 (0-0.33)    | 0 (0-0.25)       | 0.85 (0.66-0.97) | 0.59 (0.22-0.73)  | 0.01 (0-0.3)     | 0.4 (0.27-0.59)  |
| Frontal Mid Orb L    | 0.1 (0-0.43)      | 0.13 (0-0.31)    | 0.77 (0.56-0.95) | 0.01 (0-0.29)    | 0.1 (0-0.43)     | 0.9 (0.69-1)     | 0.14 (0-0.45)     | 0.09 (0-0.32)    | 0.77 (0.55-0.98) |
| Frontal Mid Orb R    | 0.11 (0-0.31)     | 0.02 (0-0.22)    | 0.87 (0.69-1)    | 0 (0-0.32)       | 0.06 (0-0.31)    | 0.94 (0.67-1)    | 0.11 (0-0.33)     | 0 (0-0.2)        | 0.89 (0.67-1)    |
| Frontal Inf Oper L   | 0.09 (0-0.39)     | 0.15 (0-0.34)    | 0.76 (0.61-0.91) | 0.04 (0-0.19)    | 0.03 (0-0.19)    | 0.93 (0.8-1)     | 0.05 (0-0.32)     | 0.12 (0-0.3)     | 0.83 (0.67-0.96) |
| Frontal Inf Oper R   | 0.15 (0-0.43)     | 0.06 (0-0.31)    | 0.79 (0.57-0.99) | 0.02 (0-0.45)    | 0.16 (0-0.42)    | 0.82 (0.54-1)    | 0.31 (0-0.52)     | 0 (0-0.34)       | 0.69 (0.48-0.92) |
| Frontal Inf Tri L    | 0.06 (0-0.27)     | 0 (0-0.15)       | 0.94 (0.73-1)    | 0.01 (0-0.11)    | 0 (0-0.09)       | 0.99 (0.89-1)    | 0.06 (0-0.27)     | 0 (0-0.16)       | 0.94 (0.73-1)    |
| Frontal Inf Tri R    | 0.01 (0-0.3)      | 0.15 (0-0.3)     | 0.84 (0.63-0.99) | 0.08 (0-0.36)    | 0.12 (0-0.36)    | 0.8 (0.59-0.99)  | 0.09 (0-0.41)     | 0.03 (0-0.18)    | 0.88 (0.57-1)    |
| Frontal Inf Orb L    | 0.08 (0-0.35)     | 0.11 (0-0.27)    | 0.82 (0.64-0.98) | 0.18 (0-0.44)    | 0.01 (0-0.28)    | 0.81 (0.55-1)    | 0.25 (0-0.52)     | 0.07 (0-0.38)    | 0.68 (0.47-0.92) |
| Frontal Inf Orb R    | 0.14 (0.01-0.29)  | 0.01 (0-0.13)    | 0.86 (0.71-0.97) | 0.14 (0-0.34)    | 0.01 (0-0.17)    | 0.85 (0.66-0.99) | 0.37 (0-0.66)     | 0.03 (0-0.3)     | 0.6 (0.34-0.91)  |
| Rolandic Oper L      | 0.03 (0-0.23)     | 0.03 (0-0.2)     | 0.94 (0.77-1)    | 0.02 (0-0.4)     | 0.21 (0-0.44)    | 0.77 (0.58-0.97) | 0.01 (0-0.21)     | 0.04 (0-0.21)    | 0.96 (0.78-1)    |
| Rolandic Oper R      | 0.01 (0-0.13)     | 0.01 (0-0.11)    | 0.98 (0.86-1)    | 0.09 (0-0.34)    | 0 (0-0.19)       | 0.9 (0.66-1)     | 0.1 (0-0.34)      | 0.03 (0-0.21)    | 0.87 (0.65-1)    |
| Supp Motor Area L    | 0.06 (0-0.24)     | 0.01 (0-0.14)    | 0.93 (0.76-1)    | 0.19 (0-0.5)     | 0.1 (0-0.39)     | 0.72 (0.49-0.92) | 0.25 (0-0.5)      | 0.08 (0-0.4)     | 0.67 (0.49-0.88) |
| Supp Motor Area R    | 0.29 (0-0.54)     | 0.05 (0-0.32)    | 0.66 (0.45-0.88) | 0.02 (0-0.23)    | 0.04 (0-0.25)    | 0.94 (0.71-1)    | 0.24 (0-0.53)     | 0.13 (0-0.42)    | 0.63 (0.45-0.85) |
| Olfactory L          | 0.26 (0-0.51)     | 0.06 (0-0.3)     | 0.68 (0.49-0.89) | 0.43 (0.04-0.64) | 0 (0-0.26)       | 0.57 (0.36-0.84) | 0.11 (0-0.45)     | 0.06 (0-0.28)    | 0.82 (0.55-1)    |
| Olfactory R          | 0.19 (0-0.44)     | 0.05 (0-0.25)    | 0.76 (0.56-0.95) | 0.03 (0-0.4)     | 0.11 (0-0.31)    | 0.86 (0.6-1)     | 0.23 (0-0.44)     | 0 (0-0.25)       | 0.77 (0.56-0.99) |
| Frontal Sup Medial L | 0.19 (0-0.42)     | 0 (0-0.26)       | 0.81 (0.58-1)    | 0.06 (0-0.24)    | 0 (0-0.21)       | 0.94 (0.75-1)    | 0.07 (0-0.26)     | 0 (0-0.19)       | 0.93 (0.74-1)    |
| Frontal Sup Medial R | 0.31 (0.03-0.49)  | 0 (0-0.24)       | 0.69 (0.51-0.88) | 0.03 (0-0.32)    | 0 (0-0.18)       | 0.97 (0.68-1)    | 0.51 (0.13-0.71)  | 0 (0-0.24)       | 0.49 (0.29-0.77) |
| Frontal Med Orb L    | 0.08 (0-0.37)     | 0.12 (0-0.31)    | 0.8 (0.62-0.95)  | 0 (0-0.29)       | 0.11 (0-0.31)    | 0.89 (0.69-1)    | 0.09 (0-0.32)     | 0.01 (0-0.24)    | 0.9 (0.68-1)     |
| Frontal Med Orb R    | 0.17 (0-0.42)     | 0.03 (0-0.23)    | 0.8 (0.58-0.97)  | 0.05 (0-0.26)    | 0.01 (0-0.16)    | 0.94 (0.71-1)    | 0.27 (0-0.58)     | 0.07 (0-0.38)    | 0.66 (0.42-0.92) |
| Rectus L             | 0.17 (0-0.42)     | 0.11 (0-0.28)    | 0.73 (0.54-0.91) | 0.21 (0-0.45)    | 0.01 (0-0.25)    | 0.79 (0.54-0.96) | 0 (0-0.3)         | 0.15 (0-0.29)    | 0.85 (0.64-0.97) |
| Rectus R             | 0.04 (0-0.29)     | 0.05 (0-0.18)    | 0.91 (0.71-1)    | 0 (0-0.16)       | 0.01 (0-0.11)    | 0.98 (0.84-1)    | 0.02 (0-0.16)     | 0.02 (0-0.14)    | 0.96 (0.81-1)    |
| Insula L             | 0.53 (0.24-0.72)  | 0 (0-0.13)       | 0.47 (0.28-0.72) | 0.27 (0-0.63)    | 0.14 (0-0.43)    | 0.58 (0.37-0.86) | 0.24 (0-0.57)     | 0.13 (0-0.42)    | 0.63 (0.43-0.86) |
| Insula R             | 0.74 (0.5-0.84)   | 0 (0-0.17)       | 0.26 (0.16-0.42) | 0.18 (0-0.68)    | 0.33 (0.05-0.4)  | 0.5 (0.29-0.71)  | 0.27 (0.03-0.7)   | 0.24 (0-0.47)    | 0.48 (0.26-0.73) |
| Cingulum Ant L       | 0 (0-0.19)        | 0.01 (0-0.17)    | 0.98 (0.8-1)     | 0.02 (0-0.19)    | 0.01 (0-0.2)     | 0.97 (0.78-1)    | 0.02 (0-0.23)     | 0 (0-0.12)       | 0.98 (0.77-1)    |
| Cingulum Ant R       | 0.23 (0-0.41)     | 0.01 (0-0.29)    | 0.76 (0.59-0.96) | 0.08 (0-0.39)    | 0.08 (0-0.34)    | 0.84 (0.61-1)    | 0.06 (0-0.35)     | 0.06 (0-0.27)    | 0.88 (0.65-1)    |
| Cingulum Mid L       | 0.19 (0-0.38)     | 0 (0-0.18)       | 0.81 (0.62-0.97) | 0.23 (0-0.55)    | 0 (0-0.21)       | 0.77 (0.45-1)    | 0.14 (0-0.38)     | 0 (0-0.19)       | 0.86 (0.62-1)    |
| Cingulum Mid R       | 0.67 (0.34-0.82)  | 0.03 (0-0.22)    | 0.3 (0.17-0.52)  | 0.12 (0-0.34)    | 0.3 (0.08-0.49)  | 0.58 (0.43-0.75) | 0.33 (0.13-0.51)  | 0.08 (0-0.27)    | 0.59 (0.43-0.78) |
| Cingulum Post L      | 0 (0-0.17)        | 0.01 (0-0.12)    | 0.99 (0.82-1)    | 0.03 (0-0.25)    | 0.08 (0-0.25)    | 0.89 (0.7-1)     | 0 (0-0.22)        | 0.09 (0-0.24)    | 0.91 (0.72-1)    |
| Cingulum Post R      | 0.24 (0.03-0.49)  | 0.03 (0-0.19)    | 0.72 (0.51-0.92) | 0.14 (0-0.42)    | 0.03 (0-0.3)     | 0.83 (0.58-1)    | 0.27 (0.03-0.52)  | 0 (0-0.15)       | 0.73 (0.48-0.96) |
| ParaHippocampal L    | 0.15 (0-0.34)     | 0 (0-0.12)       | 0.85 (0.66-0.98) | 0.33 (0.07-0.55) | 0 (0-0.21)       | 0.67 (0.45-0.89) | 0.55 (0.22-0.71)  | 0 (0-0.21)       | 0.45 (0.29-0.68) |
| ParaHippocampal R    | 0.01 (0-0.25)     | 0.01 (0-0.13)    | 0.97 (0.75-1)    | 0.2 (0-0.54)     | 0.05 (0-0.28)    | 0.74 (0.45-0.98) | 0.13 (0-0.46)     | 0.11 (0-0.32)    | 0.76 (0.5-0.96)  |
| Calcarine L          | 0 (0-0.3)         | 0.21 (0-0.35)    | 0.79 (0.61-0.94) | 0.07 (0-0.6)     | 0.16 (0-0.41)    | 0.77 (0.39-0.99) | 0.03 (0-0.45)     | 0.23 (0-0.43)    | 0.74 (0.52-0.95) |
| Calcarine R          | 0.3 (0.01-0.53)   | 0.05 (0-0.24)    | 0.65 (0.45-0.89) | 0.35 (0.03-0.66) | 0.12 (0-0.37)    | 0.53 (0.33-0.77) | 0.03 (0-0.24)     | 0 (0-0.14)       | 0.97 (0.75-1)    |
| Cuneus L             | 0.1 (0-0.3)       | 0 (0-0.15)       | 0.9 (0.7-1)      | 0.01 (0-0.18)    | 0 (0-0.16)       | 0.99 (0.8-1)     | 0.19 (0-0.46)     | 0 (0-0.26)       | 0.81 (0.54-1)    |
| Cuneus R             | 0 (0-0.43)        | 0.1 (0-0.25)     | 0.9 (0.57-1)     | 0 (0-0.37)       | 0.11 (0-0.27)    | 0.89 (0.63-1)    | 0 (0-0.2)         | 0.01 (0-0.14)    | 0.99 (0.8-1)     |
| Lingual L            | 0.4 (0-0.6)       | 0.01 (0-0.3)     | 0.59 (0.4-0.82)  | 0 (0-0.09)       | 0 (0-0.09)       | 1 (0.88-1)       | 0.42 (0-0.62)     | 0 (0-0.25)       | 0.58 (0.38-0.85) |
| Lingual R            | 0.1 (0-0.41)      | 0.1 (0-0.27)     | 0.79 (0.57-0.97) | 0 (0-0.44)       | 0.08 (0-0.32)    | 0.92 (0.56-1)    | 0.1 (0-0.47)      | 0.12 (0-0.29)    | 0.78 (0.49-0.98) |
| Occipital Sup L      | 0.09 (0-0.33)     | 0.06 (0-0.25)    | 0.85 (0.67-0.99) | 0.02 (0-0.22)    | 0.01 (0-0.17)    | 0.97 (0.78-1)    | 0.06 (0-0.32)     | 0.05 (0-0.25)    | 0.89 (0.68-1)    |
| Occipital Sup R      | 0.23 (0-0.49)     | 0.07 (0-0.32)    | 0.71 (0.51-0.91) | 0.05 (0-0.28)    | 0.05 (0-0.25)    | 0.9 (0.71-1)     | 0.15 (0-0.38)     | 0.01 (0-0.18)    | 0.84 (0.62-0.99) |
| Occipital Mid L      | 0.01 (0-0.4)      | 0.21 (0-0.36)    | 0.78 (0.6-0.94)  | 0.02 (0-0.35)    | 0.08 (0-0.3)     | 0.9 (0.64-1)     | 0.03 (0-0.38)     | 0.14 (0-0.3)     | 0.82 (0.61-0.98) |
| Occipital Mid R      | 0.14 (0-0.24)     | 0.2 (0.06-0.34)  | 0.76 (0.59-0.92) | 0 (0-0.25)       | 0.13 (0.01-0.29) | 0.87 (0.66-0.98) | 0.07 (0-0.26)     | 0.05 (0-0.21)    | 0.88 (0.69-1)    |
| Occipital Inf L      | 0 (0-0.24)        | 0.08 (0-0.2)     | 0.92 (0.76-0.99) | 0 (0-0.18)       | 0.03 (0-0.14)    | 0.97 (0.81-1)    | 0 (0-0.41)        | 0.17 (0-0.33)    | 0.83 (0.58-0.97) |
| Occipital Inf R      | 0.11 (0-0.35)     | 0.01 (0-0.19)    | 0.88 (0.65-1)    | 0.08 (0-0.48)    | 0.2 (0-0.44)     | 0.72 (0.48-0.97) | 0.02 (0-0.17)     | 0.05 (0-0.2)     | 0.94 (0.77-1)    |
| Fusiform L           | 0.2 (0-0.4)       | 0 (0-0.22)       | 0.8 (0.6-0.97)   | 0.02 (0-0.22)    | 0.02 (0-0.14)    | 0.96 (0.78-1)    | 0.29 (0-0.55)     | 0.02 (0-0.29)    | 0.7 (0.45-0.96)  |
| Fusiform R           | 0.31 (0.07-0.5)   | 0 (0-0.15)       | 0.69 (0.5-0.88)  | 0.04 (0-0.35)    | 0.15 (0-0.36)    | 0.82 (0.58-0.98) | 0.43 (0.09-0.63)  | 0.03 (0-0.25)    | 0.54 (0.36-0.77) |
| Postcentral L        | 0.26 (0-0.55)     | 0.04 (0-0.29)    | 0.7 (0.44-0.97)  | 0 (0-0.17)       | 0 (0-0.13)       | 1 (0.83-1)       | 0.24 (0-0.5)      | 0.04 (0-0.29)    | 0.72 (0.49-0.96) |
| Postcentral R        | 0.52 (0.14-0.69)  | 0.04 (0-0.34)    | 0.44 (0.31-0.62) | 0.02 (0-0.18)    | 0.01 (0-0.16)    | 0.96 (0.8-1)     | 0.62 (0.25-0.76)  | 0.02 (0-0.3)     | 0.36 (0.24-0.54) |
| Parietal Sup L       | 0.06 (0-0.25)     | 0 (0-0.16)       | 0.94 (0.75-1)    | 0.02 (0-0.22)    | 0 (0-0.18)       | 0.98 (0.78-1)    | 0.02 (0-0.17)     | 0 (0-0.11)       | 0.98 (0.83-1)    |
| Parietal Sup R       | 0.21 (0-0.48)     | 0.12 (0-0.36)    | 0.67 (0.51-0.85) | 0.09 (0-0.38)    | 0.07 (0-0.33)    | 0.84 (0.6-1)     | 0.3 (0-0.5)       | 0.02 (0-0.33)    | 0.68 (0.5-0.89)  |
| Parietal Inf L       | 0.22 (0-0.44)     | 0.01 (0-0.26)    | 0.77 (0.56-0.99) | 0.03 (0-0.37)    | 0.11 (0-0.36)    | 0.87 (0.59-1)    | 0.22 (0-0.47)     | 0.07 (0-0.35)    | 0.71 (0.51-0.94) |
| Parietal Inf R       | 0 (0-0.3)         | 0.21 (0.01-0.34) | 0.79 (0.63-0.9)  | 0.06 (0-0.33)    | 0.22 (0-0.44)    | 0.71 (0.54-0.88) | 0.04 (0-0.47)     | 0.42 (0.04-0.56) | 0.54 (0.41-0.69) |
| SupraMarginal L      | 0.21 (0-0.42)     | 0 (0-0.21)       | 0.79 (0.58-0.99) | 0.07 (0-0.32)    | 0.19 (0-0.4)     | 0.73 (0.55-0.93) | 0.06 (0-0.25)     | 0.12 (0-0.28)    | 0.82 (0.66-0.95) |
| SupraMarginal R      | 0.31 (0.02-0.57)  | 0.09 (0-0.33)    | 0.6 (0.43-0.8)   | 0.06 (0-0.36)    | 0.06 (0-0.33)    | 0.88 (0.62-1)    | 0.4 (0-0.69)      | 0.13 (0-0.47)    | 0.47 (0.31-0.7)  |
| Angular L            | 0.14 (0-0.42)     | 0.12 (0-0.3)     | 0.74 (0.54-0.92) | 0 (0-0.16)       | 0.02 (0-0.18)    | 0.97 (0.81-1)    | 0.11 (0-0.41)     | 0.18 (0-0.36)    | 0.71 (0.53-0.89) |
| Angular R            | 0 (0-0.12)        | 0 (0-0.1)        | 1 (0.87-1)       | 0.02 (0-0.22)    | 0 (0-0.12)       | 0.98 (0.78-1)    | 0.01 (0-0.14)     | 0 (0-0.13)       | 0.99 (0.85-1)    |
| Precuneus L          | 0.13 (0-0.35)     | 0.06 (0-0.26)    | 0.81 (0.62-1)    | 0.14 (0-0.38)    | 0.09 (0-0.35)    | 0.77 (0.57-0.99) | 0.06 (0-0.28)     | 0.16 (0-0.32)    | 0.77 (0.6-0.95)  |
| Precuneus R          | 0.39 (0.01-0.67)  | 0.04 (0-0.25)    | 0.56 (0.33-0.85) | 0.06 (0-0.51)    | 0.2 (0-0.38)     | 0.75 (0.49-0.95) | 0.25 (0.03-0.47)  | 0.02 (0-0.17)    | 0.73 (0.52-0.95) |
| Paracentral Lobule L | 0.34 (0.01-0.55)  | 0.05 (0-0.3)     | 0.61 (0.44-0.82) | 0.01 (0-0.15)    | 0.03 (0-0.17)    | 0.96 (0.8-1)     | 0.24 (0-0.5)      | 0.11 (0-0.37)    | 0.65 (0.49-0.83) |
| Paracentral Lobule R | 0.26 (0.01-0.47)  | 0.01 (0-0.15)    | 0.74 (0.53-0.96) | 0.03 (0-0.27)    | 0.06 (0-0.25)    | 0.91 (0.73-1)    | 0.17 (0-0.38)     | 0.01 (0-0.16)    | 0.82 (0.61-0.98) |
| Heschl L             | 0.06 (0-0.3)      | 0.1 (0-0.27)     | 0.84 (0.65-1)    | 0.14 (0-0.38)    | 0.01 (0-0.27)    | 0.85 (0.61-1)    | 0.09 (0-0.41)     | 0.05 (0-0.25)    | 0.86 (0.57-1)    |
| Heschl R             | 0.06 (0-0.26)     | 0.01 (0-0.21)    | 0.93 (0.74-1)    | 0.02 (0-0.21)    | 0 (0-0.18)       | 0.98 (0.78-1)    | 0.15 (0-0.41)     | 0 (0-0.26)       | 0.85 (0.59-1)    |
| Temporal Sup L       | 0.15 (0-0.39)     | 0.02 (0-0.25)    | 0.83 (0.61-1)    | 0.07 (0-0.45)    | 0.23 (0-0.44)    | 0.7 (0.49-0.9)   | 0.05 (0-0.28)     | 0.03 (0-0.24)    | 0.91 (0.69-1)    |
| Temporal Sup R       | 0.12 (0-0.34)     | 0.02 (0-0.21)    | 0.86 (0.65-1)    | 0.01 (0-0.3)     | 0.17 (0-0.36)    | 0.82 (0.62-1)    | 0.12 (0-0.4)      | 0.03 (0-0.26)    | 0.85 (0.59-1)    |
| Temporal Pole Sup L  | 0.1 (0-0.3)       | 0.01 (0-0.11)    | 0.89 (0.7-0.99)  | 0.27 (0-0.63)    | 0.01 (0-0.19)    | 0.71 (0.37-1)    | 0 (0-0.2)         | 0.04 (0-0.16)    | 0.96 (0.78-1)    |
| Temporal Pole Sup R  | 0.44 (0-0.65)     | 0 (0-0.24)       | 0.56 (0.35-0.85) | 0.08 (0-0.38)    | 0.01 (0-0.18)    | 0.91 (0.62-1)    | 0.28 (0-0.57)     | 0.02 (0-0.26)    | 0.71 (0.43-0.96) |
| Temporal Mid L       | 0.07 (0-0.32)     | 0.04 (0-0.19)    | 0.89 (0.67-1)    | 0.07 (0-0.49)    | 0.21 (0-0.44)    | 0.71 (0.5-0.94)  | 0.11 (0-0.35)     | 0.01 (0-0.19)    | 0.88 (0.64-1)    |
| Temporal Mid R       | 0.18 (0-0.54)     | 0.17 (0-0.4)     | 0.65 (0.45-0.86) | 0.01 (0-0.34)    | 0.25 (0-0.44)    | 0.75 (0.56-0.96) | 0.17 (0-0.58)     | 0.18 (0-0.42)    | 0.65 (0.41-0.9)  |
| Temporal Pole Mid L  | 0.09 (0-0.33)     | 0.05 (0-0.22)    | 0.85 (0.65-1)    | 0.22 (0-0.51)    | 0.02 (0-0.25)    | 0.76 (0.49-1)    | 0.01 (0-0.35)     | 0.13 (0-0.31)    | 0.86 (0.66-1)    |
| Temporal Pole Mid R  | 0.18 (0-0.5)      | 0.13 (0-0.36)    | 0.69 (0.49-0.89) | 0.17 (0-0.56)    | 0.16 (0-0.44)    | 0.67 (0.4        |                   |                  |                  |



Table S9: Regional CT correlation within MZ or DZ twin for all timepoints

|                      | Neonate           |                    | 1-year            |                    | 2-year            |                    |
|----------------------|-------------------|--------------------|-------------------|--------------------|-------------------|--------------------|
|                      | $r_{MZ}$          | $r_{DZ}$           | $r_{MZ}$          | $r_{DZ}$           | $r_{MZ}$          | $r_{DZ}$           |
| Precentral L         | 0.56 (0.36-0.71)  | 0.52 (0.38-0.64)   | 0.5 (0.24-0.69)   | 0.46 (0.24-0.63)   | 0.56 (0.28-0.75)  | 0.53 (0.27-0.72)   |
| Precentral R         | 0.63 (0.45-0.76)  | 0.49 (0.34-0.62)   | 0.58 (0.34-0.75)  | 0.3 (0.06-0.5)     | 0.71 (0.5-0.84)   | 0.5 (0.24-0.7)     |
| Frontal Sup L        | 0.69 (0.54-0.8)   | 0.55 (0.41-0.67)   | 0.58 (0.35-0.75)  | 0.44 (0.22-0.61)   | 0.6 (0.33-0.78)   | 0.42 (0.13-0.64)   |
| Frontal Sup R        | 0.71 (0.57-0.82)  | 0.63 (0.51-0.73)   | 0.5 (0.24-0.7)    | 0.36 (0.13-0.56)   | 0.71 (0.5-0.84)   | 0.41 (0.12-0.63)   |
| Frontal Sup Orb L    | 0.53 (0.33-0.69)  | 0.49 (0.34-0.62)   | 0.35 (0.06-0.58)  | 0.36 (0.13-0.55)   | 0.27 (-0.06-0.55) | 0.03 (-0.28-0.32)  |
| Frontal Sup Orb R    | 0.59 (0.41-0.73)  | 0.51 (0.36-0.63)   | 0.54 (0.29-0.72)  | 0.32 (0.09-0.52)   | 0.49 (0.19-0.7)   | 0.28 (-0.03-0.53)  |
| Frontal Mid L        | 0.63 (0.46-0.76)  | 0.55 (0.41-0.66)   | 0.59 (0.35-0.75)  | 0.29 (0.05-0.5)    | 0.6 (0.33-0.77)   | 0.34 (0.04-0.58)   |
| Frontal Mid R        | 0.58 (0.39-0.72)  | 0.58 (0.44-0.69)   | 0.48 (0.21-0.68)  | 0.52 (0.31-0.67)   | 0.67 (0.43-0.82)  | 0.41 (0.12-0.63)   |
| Frontal Mid Orb L    | 0.2 (-0.05-0.43)  | 0.28 (0.1-0.44)    | 0.38 (0.09-0.61)  | 0.27 (0.03-0.48)   | 0.23 (-0.11-0.52) | -0.18 (-0.46-0.13) |
| Frontal Mid Orb R    | 0.53 (0.33-0.69)  | 0.31 (0.14-0.47)   | 0.44 (0.17-0.66)  | 0.27 (0.03-0.48)   | 0.24 (-0.09-0.53) | 0.18 (-0.13-0.45)  |
| Frontal Inf Oper L   | 0.47 (0.25-0.64)  | 0.28 (0.1-0.43)    | 0.42 (0.14-0.64)  | 0.21 (-0.04-0.43)  | 0.58 (0.31-0.76)  | 0.41 (0.12-0.63)   |
| Frontal Inf Oper R   | 0.43 (0.21-0.61)  | 0.18 (0-0.35)      | 0.56 (0.31-0.73)  | 0.29 (0.05-0.5)    | 0.63 (0.38-0.79)  | 0.54 (0.29-0.72)   |
| Frontal Inf Tri L    | 0.61 (0.43-0.75)  | 0.37 (0.2-0.52)    | 0.61 (0.39-0.77)  | 0.42 (0.2-0.6)     | 0.62 (0.37-0.79)  | 0.37 (0.08-0.61)   |
| Frontal Inf Tri R    | 0.37 (0.13-0.56)  | 0.3 (0.12-0.46)    | 0.46 (0.18-0.66)  | 0.2 (-0.05-0.42)   | 0.56 (0.29-0.75)  | 0.3 (0-0.55)       |
| Frontal Inf Orb L    | 0.49 (0.28-0.66)  | 0.49 (0.33-0.61)   | 0.48 (0.22-0.68)  | 0.39 (0.17-0.58)   | 0.46 (0.16-0.69)  | 0.22 (-0.09-0.49)  |
| Frontal Inf Orb R    | 0.57 (0.37-0.71)  | 0.38 (0.21-0.53)   | 0.48 (0.22-0.68)  | 0.38 (0.15-0.57)   | 0.58 (0.31-0.76)  | 0.34 (0.04-0.58)   |
| Rolandic Oper L      | 0.51 (0.3-0.67)   | 0.38 (0.21-0.52)   | 0.6 (0.37-0.76)   | 0.52 (0.32-0.68)   | 0.76 (0.58-0.87)  | 0.6 (0.37-0.76)    |
| Rolandic Oper R      | 0.38 (0.15-0.58)  | 0.28 (0.1-0.44)    | 0.57 (0.33-0.74)  | 0.38 (0.16-0.57)   | 0.76 (0.58-0.87)  | 0.57 (0.33-0.74)   |
| Supp Motor Area L    | 0.61 (0.43-0.75)  | 0.37 (0.2-0.52)    | 0.56 (0.31-0.73)  | 0.39 (0.16-0.58)   | 0.6 (0.34-0.78)   | 0.41 (0.12-0.63)   |
| Supp Motor Area R    | 0.5 (0.29-0.67)   | 0.44 (0.28-0.58)   | 0.49 (0.23-0.69)  | 0.35 (0.12-0.55)   | 0.64 (0.39-0.8)   | 0.37 (0.07-0.6)    |
| Olfactory L          | 0.22 (-0.03-0.45) | 0.22 (0.04-0.38)   | 0.07 (-0.23-0.36) | 0.39 (0.16-0.57)   | 0.53 (0.24-0.73)  | 0.22 (-0.09-0.49)  |
| Olfactory R          | 0.29 (0.04-0.5)   | 0.3 (0.12-0.46)    | 0.64 (0.42-0.79)  | 0.21 (-0.03-0.43)  | 0.24 (-0.1-0.52)  | 0.6 (0.37-0.76)    |
| Frontal Sup Medial L | 0.55 (0.35-0.7)   | 0.39 (0.22-0.53)   | 0.66 (0.45-0.8)   | 0.38 (0.15-0.57)   | 0.62 (0.37-0.79)  | 0.32 (0.02-0.57)   |
| Frontal Sup Medial R | 0.51 (0.3-0.67)   | 0.33 (0.16-0.49)   | 0.53 (0.28-0.72)  | 0.4 (0.17-0.58)    | 0.63 (0.38-0.79)  | 0.38 (0.09-0.61)   |
| Frontal Med Orb L    | 0.25 (0.01-0.47)  | -0.01 (-0.19-0.17) | 0.47 (0.21-0.68)  | 0.04 (-0.21-0.28)  | 0.28 (-0.06-0.55) | 0.2 (-0.11-0.47)   |
| Frontal Med Orb R    | 0.47 (0.25-0.64)  | 0.21 (0.03-0.38)   | 0.59 (0.35-0.75)  | 0.2 (-0.04-0.43)   | 0.48 (0.17-0.7)   | 0.13 (-0.17-0.42)  |
| Rectus L             | 0.52 (0.31-0.68)  | 0.14 (-0.04-0.31)  | 0.42 (0.15-0.64)  | 0.19 (-0.05-0.41)  | 0.44 (0.13-0.67)  | -0.02 (-0.32-0.28) |
| Rectus R             | 0.43 (0.21-0.61)  | 0.14 (-0.05-0.31)  | 0.61 (0.39-0.77)  | 0.33 (0.1-0.53)    | 0.56 (0.28-0.75)  | 0.25 (-0.05-0.51)  |
| Insula L             | 0.72 (0.57-0.82)  | 0.38 (0.21-0.52)   | 0.53 (0.28-0.72)  | 0.35 (0.12-0.55)   | 0.51 (0.22-0.72)  | 0.51 (0.24-0.7)    |
| Insula R             | 0.72 (0.57-0.82)  | 0.43 (0.27-0.57)   | 0.6 (0.36-0.76)   | 0.51 (0.3-0.67)    | 0.39 (0.07-0.64)  | 0.5 (0.23-0.69)    |
| Cingulum Ant L       | 0.36 (0.12-0.56)  | 0.29 (0.12-0.45)   | 0.24 (-0.06-0.5)  | 0.46 (0.24-0.63)   | 0.5 (0.21-0.71)   | 0.29 (-0.01-0.54)  |
| Cingulum Ant R       | 0.18 (-0.07-0.41) | 0.38 (0.22-0.53)   | 0.4 (0.11-0.62)   | 0.5 (0.29-0.66)    | 0.51 (0.22-0.72)  | 0.32 (0.03-0.57)   |
| Cingulum Mid L       | 0.56 (0.37-0.71)  | 0.39 (0.22-0.53)   | 0.27 (-0.02-0.53) | 0.34 (0.11-0.54)   | 0.51 (0.22-0.72)  | 0.41 (0.12-0.63)   |
| Cingulum Mid R       | 0.5 (0.29-0.67)   | 0.46 (0.3-0.59)    | 0.48 (0.21-0.68)  | 0.31 (0.07-0.51)   | 0.47 (0.17-0.69)  | 0.31 (0.01-0.56)   |
| Cingulum Post L      | 0.32 (0.07-0.52)  | 0.04 (-0.14-0.22)  | 0.34 (0.05-0.58)  | 0.21 (-0.03-0.43)  | 0.67 (0.44-0.82)  | 0.19 (-0.12-0.46)  |
| Cingulum Post R      | 0.15 (-0.1-0.39)  | 0.24 (0.06-0.41)   | 0.37 (0.08-0.6)   | 0.06 (-0.19-0.3)   | 0.53 (0.25-0.73)  | 0.12 (-0.19-0.4)   |
| ParaHippocampal L    | 0.6 (0.41-0.73)   | 0.25 (0.07-0.41)   | 0.24 (-0.06-0.5)  | 0.19 (-0.05-0.41)  | 0.39 (0.08-0.64)  | 0.21 (-0.09-0.48)  |
| ParaHippocampal R    | 0.5 (0.28-0.66)   | 0.05 (-0.13-0.23)  | 0.34 (0.05-0.58)  | 0.21 (-0.03-0.43)  | 0.66 (0.42-0.81)  | 0.52 (0.26-0.71)   |
| Calcarine L          | 0.35 (0.11-0.55)  | 0.44 (0.28-0.58)   | 0.49 (0.23-0.69)  | -0.08 (-0.31-0.17) | 0.61 (0.35-0.78)  | 0.17 (-0.14-0.45)  |
| Calcarine R          | 0.37 (0.14-0.57)  | 0.31 (0.14-0.46)   | 0.57 (0.33-0.74)  | 0.09 (-0.16-0.32)  | 0.34 (0.01-0.6)   | 0.57 (0.33-0.74)   |
| Cuneus L             | 0.26 (0.02-0.48)  | 0.17 (-0.01-0.34)  | 0.32 (0.02-0.56)  | 0.32 (0.08-0.52)   | 0.56 (0.28-0.75)  | 0.43 (0.15-0.65)   |
| Cuneus R             | 0.08 (-0.17-0.32) | 0.23 (0.05-0.4)    | 0.3 (0-0.55)      | 0.3 (0.06-0.5)     | 0.5 (0.21-0.71)   | 0.46 (0.19-0.67)   |
| Lingual L            | 0.3 (0.06-0.51)   | 0.41 (0.25-0.55)   | 0.55 (0.3-0.72)   | 0.13 (-0.12-0.36)  | 0.51 (0.21-0.72)  | 0.43 (0.15-0.65)   |
| Lingual R            | 0.31 (0.07-0.52)  | 0.46 (0.3-0.59)    | 0.5 (0.24-0.69)   | 0.17 (-0.07-0.4)   | 0.47 (0.17-0.69)  | 0.27 (-0.04-0.52)  |
| Occipital Sup L      | 0.19 (-0.06-0.42) | 0.39 (0.23-0.54)   | 0.34 (0.05-0.58)  | 0.45 (0.23-0.62)   | 0.51 (0.22-0.72)  | 0.48 (0.21-0.68)   |
| Occipital Sup R      | 0.18 (-0.07-0.41) | 0.21 (0.03-0.38)   | 0.51 (0.25-0.7)   | 0.46 (0.25-0.63)   | 0.85 (0.72-0.92)  | 0.48 (0.21-0.68)   |
| Occipital Mid L      | 0.5 (0.28-0.66)   | 0.49 (0.34-0.61)   | 0.57 (0.32-0.74)  | 0.45 (0.23-0.62)   | 0.48 (0.18-0.7)   | 0.42 (0.14-0.64)   |
| Occipital Mid R      | 0.34 (0.1-0.54)   | 0.24 (0.07-0.41)   | 0.37 (0.08-0.6)   | 0.38 (0.15-0.57)   | 0.56 (0.28-0.75)  | 0.41 (0.13-0.64)   |
| Occipital Inf L      | 0.45 (0.23-0.63)  | 0.17 (-0.01-0.34)  | 0.24 (-0.06-0.5)  | -0.06 (-0.3-0.18)  | 0.51 (0.22-0.72)  | 0.22 (-0.09-0.49)  |
| Occipital Inf R      | 0.55 (0.35-0.7)   | 0.33 (0.16-0.48)   | 0.3 (0.01-0.55)   | 0.23 (-0.01-0.45)  | 0.28 (-0.06-0.55) | 0.32 (0.02-0.57)   |
| Fusiform L           | 0.53 (0.32-0.69)  | 0.32 (0.14-0.47)   | 0.55 (0.3-0.73)   | 0.35 (0.12-0.54)   | 0.45 (0.14-0.68)  | 0.34 (0.04-0.58)   |
| Fusiform R           | 0.53 (0.33-0.69)  | 0.41 (0.25-0.55)   | 0.49 (0.22-0.69)  | 0.18 (-0.07-0.4)   | 0.48 (0.19-0.7)   | 0.24 (-0.06-0.51)  |
| Postcentral L        | 0.65 (0.48-0.77)  | 0.42 (0.26-0.56)   | 0.74 (0.56-0.85)  | 0.38 (0.15-0.57)   | 0.6 (0.33-0.77)   | 0.73 (0.56-0.85)   |
| Postcentral R        | 0.64 (0.46-0.76)  | 0.44 (0.28-0.58)   | 0.69 (0.5-0.82)   | 0.42 (0.2-0.6)     | 0.75 (0.57-0.87)  | 0.49 (0.23-0.69)   |

Table S9: Regional CT correlation within MZ or DZ twin for all timepoints  
(continued)

|                      | $r_{MZ}$         | $r_{DZ}$          | $r_{MZ}$         | $r_{DZ}$          | $r_{MZ}$          | $r_{DZ}$          |
|----------------------|------------------|-------------------|------------------|-------------------|-------------------|-------------------|
| Parietal Sup L       | 0.52 (0.31-0.68) | 0.47 (0.32-0.6)   | 0.65 (0.43-0.79) | 0.53 (0.33-0.68)  | 0.64 (0.4-0.8)    | 0.53 (0.27-0.71)  |
| Parietal Sup R       | 0.28 (0.04-0.5)  | 0.37 (0.21-0.52)  | 0.61 (0.38-0.77) | 0.51 (0.31-0.67)  | 0.72 (0.51-0.85)  | 0.7 (0.51-0.83)   |
| Parietal Inf L       | 0.37 (0.13-0.56) | 0.3 (0.13-0.46)   | 0.57 (0.32-0.74) | 0.37 (0.14-0.56)  | 0.49 (0.19-0.7)   | 0.46 (0.19-0.67)  |
| Parietal Inf R       | 0.43 (0.21-0.62) | 0.3 (0.13-0.46)   | 0.24 (-0.07-0.5) | 0.19 (-0.06-0.41) | 0.64 (0.4-0.8)    | 0.31 (0.02-0.56)  |
| SupraMarginal L      | 0.33 (0.09-0.54) | 0.15 (-0.03-0.32) | 0.51 (0.25-0.7)  | 0.23 (-0.02-0.45) | 0.68 (0.46-0.83)  | 0.44 (0.16-0.66)  |
| SupraMarginal R      | 0.32 (0.07-0.52) | 0.33 (0.16-0.48)  | 0.54 (0.29-0.72) | 0.28 (0.04-0.49)  | 0.56 (0.28-0.75)  | 0.51 (0.25-0.7)   |
| Angular L            | 0.17 (-0.08-0.4) | 0.02 (-0.16-0.2)  | 0.48 (0.21-0.68) | 0.39 (0.16-0.57)  | 0.4 (0.09-0.65)   | 0.58 (0.33-0.75)  |
| Angular R            | 0.5 (0.29-0.66)  | 0.36 (0.2-0.51)   | 0.62 (0.39-0.77) | 0.3 (0.06-0.5)    | 0.58 (0.31-0.76)  | 0.37 (0.08-0.6)   |
| Precuneus L          | 0.49 (0.27-0.65) | 0.2 (0.02-0.37)   | 0.63 (0.41-0.78) | 0.57 (0.38-0.71)  | 0.75 (0.57-0.87)  | 0.5 (0.24-0.7)    |
| Precuneus R          | 0.3 (0.06-0.51)  | 0.22 (0.04-0.38)  | 0.6 (0.37-0.76)  | 0.38 (0.15-0.57)  | 0.7 (0.48-0.84)   | 0.46 (0.18-0.67)  |
| Paracentral Lobule L | 0.56 (0.36-0.71) | 0.25 (0.08-0.42)  | 0.56 (0.31-0.73) | 0.39 (0.17-0.58)  | 0.47 (0.17-0.69)  | 0.39 (0.1-0.62)   |
| Paracentral Lobule R | 0.36 (0.13-0.56) | 0.12 (-0.06-0.3)  | 0.37 (0.08-0.6)  | 0.44 (0.22-0.61)  | 0.4 (0.09-0.65)   | 0.33 (0.03-0.57)  |
| Heschl L             | 0.38 (0.15-0.58) | 0.13 (-0.06-0.3)  | 0.57 (0.33-0.74) | 0.25 (0.01-0.46)  | 0.59 (0.32-0.77)  | 0.56 (0.31-0.73)  |
| Heschl R             | 0.58 (0.39-0.73) | 0.3 (0.13-0.46)   | 0.37 (0.08-0.6)  | 0.45 (0.23-0.62)  | 0.6 (0.33-0.77)   | 0.32 (0.02-0.57)  |
| Temporal Sup L       | 0.45 (0.23-0.63) | 0.23 (0.05-0.4)   | 0.51 (0.25-0.7)  | 0.5 (0.29-0.66)   | 0.72 (0.51-0.85)  | 0.58 (0.34-0.75)  |
| Temporal Sup R       | 0.55 (0.35-0.7)  | 0.17 (-0.01-0.34) | 0.43 (0.15-0.65) | 0.44 (0.22-0.62)  | 0.69 (0.47-0.83)  | 0.69 (0.49-0.82)  |
| Temporal Pole Sup L  | 0.43 (0.2-0.61)  | 0.17 (-0.02-0.34) | 0.56 (0.32-0.74) | 0.09 (-0.15-0.33) | 0.67 (0.44-0.82)  | 0.52 (0.26-0.71)  |
| Temporal Pole Sup R  | 0.25 (0-0.47)    | 0.26 (0.08-0.42)  | 0.49 (0.22-0.68) | 0.19 (-0.05-0.41) | 0.56 (0.28-0.75)  | 0.47 (0.2-0.68)   |
| Temporal Mid L       | 0.46 (0.23-0.63) | 0.29 (0.12-0.45)  | 0.59 (0.36-0.76) | 0.17 (-0.07-0.4)  | 0.7 (0.49-0.84)   | 0.35 (0.06-0.59)  |
| Temporal Mid R       | 0.59 (0.4-0.73)  | 0.43 (0.27-0.56)  | 0.54 (0.29-0.72) | 0.26 (0.01-0.47)  | 0.57 (0.3-0.76)   | 0.58 (0.34-0.75)  |
| Temporal Pole Mid L  | 0.36 (0.13-0.56) | 0.08 (-0.11-0.25) | 0.38 (0.09-0.6)  | 0.31 (0.08-0.52)  | 0.32 (-0.01-0.58) | 0.23 (-0.08-0.49) |
| Temporal Pole Mid R  | 0.51 (0.3-0.67)  | 0.29 (0.11-0.44)  | 0.56 (0.31-0.73) | 0.27 (0.03-0.48)  | 0.59 (0.32-0.77)  | 0.29 (-0.01-0.54) |
| Temporal Inf L       | 0.67 (0.51-0.79) | 0.25 (0.07-0.41)  | 0.59 (0.36-0.76) | 0.43 (0.21-0.61)  | 0.59 (0.32-0.77)  | 0.39 (0.11-0.62)  |
| Temporal Inf R       | 0.55 (0.35-0.7)  | 0.37 (0.2-0.52)   | 0.51 (0.25-0.7)  | 0.3 (0.07-0.51)   | 0.54 (0.25-0.74)  | 0.5 (0.24-0.7)    |

Table S10: Regional SA correlation within MZ or DZ twin for all timepoints

|                      | Neonate          |                   | 1-year            |                    | 2-year            |                    |
|----------------------|------------------|-------------------|-------------------|--------------------|-------------------|--------------------|
|                      | $r_{MZ}$         | $r_{DZ}$          | $r_{MZ}$          | $r_{DZ}$           | $r_{MZ}$          | $r_{DZ}$           |
| Precentral L         | 0.76 (0.63-0.85) | 0.54 (0.4-0.66)   | 0.6 (0.38-0.76)   | 0.18 (-0.06-0.41)  | 0.64 (0.39-0.8)   | 0.31 (0.01-0.56)   |
| Precentral R         | 0.82 (0.72-0.89) | 0.56 (0.42-0.67)  | 0.64 (0.43-0.79)  | 0.15 (-0.1-0.38)   | 0.49 (0.19-0.71)  | 0.22 (-0.09-0.49)  |
| Frontal Sup L        | 0.53 (0.33-0.69) | 0.59 (0.46-0.7)   | 0.64 (0.42-0.79)  | 0.43 (0.21-0.61)   | 0.6 (0.34-0.78)   | 0.44 (0.16-0.65)   |
| Frontal Sup R        | 0.76 (0.62-0.84) | 0.64 (0.51-0.73)  | 0.49 (0.22-0.69)  | 0.34 (0.11-0.54)   | 0.6 (0.34-0.78)   | 0.5 (0.24-0.7)     |
| Frontal Sup Orb L    | 0.62 (0.44-0.75) | 0.44 (0.28-0.58)  | 0.73 (0.56-0.85)  | 0.35 (0.11-0.54)   | 0.43 (0.12-0.67)  | 0.15 (-0.16-0.43)  |
| Frontal Sup Orb R    | 0.65 (0.47-0.77) | 0.61 (0.48-0.71)  | 0.69 (0.49-0.82)  | 0.31 (0.08-0.52)   | 0.48 (0.17-0.7)   | 0.21 (-0.09-0.48)  |
| Frontal Mid L        | 0.82 (0.72-0.89) | 0.57 (0.44-0.68)  | 0.68 (0.48-0.81)  | 0.19 (-0.06-0.41)  | 0.81 (0.66-0.9)   | 0.3 (0-0.55)       |
| Frontal Mid R        | 0.83 (0.73-0.89) | 0.65 (0.53-0.75)  | 0.68 (0.48-0.81)  | 0.19 (-0.05-0.41)  | 0.73 (0.53-0.85)  | 0.38 (0.09-0.61)   |
| Frontal Mid Orb L    | 0.71 (0.57-0.82) | 0.42 (0.26-0.56)  | 0.67 (0.47-0.81)  | 0.38 (0.15-0.57)   | 0.57 (0.3-0.76)   | 0.26 (-0.04-0.52)  |
| Frontal Mid Orb R    | 0.78 (0.67-0.86) | 0.55 (0.41-0.66)  | 0.7 (0.51-0.83)   | 0.32 (0.08-0.52)   | 0.64 (0.4-0.8)    | 0.4 (0.11-0.62)    |
| Frontal Inf Oper L   | 0.59 (0.4-0.73)  | 0.49 (0.34-0.62)  | 0.54 (0.28-0.72)  | 0.33 (0.09-0.53)   | 0.44 (0.13-0.67)  | 0.45 (0.17-0.66)   |
| Frontal Inf Oper R   | 0.64 (0.47-0.77) | 0.4 (0.23-0.54)   | 0.53 (0.27-0.71)  | 0.02 (-0.22-0.26)  | 0.45 (0.14-0.68)  | -0.06 (-0.36-0.24) |
| Frontal Inf Tri L    | 0.62 (0.44-0.75) | 0.41 (0.25-0.55)  | 0.22 (-0.08-0.49) | 0.12 (-0.12-0.36)  | 0.24 (-0.09-0.53) | 0.44 (0.17-0.66)   |
| Frontal Inf Tri R    | 0.72 (0.57-0.82) | 0.39 (0.22-0.53)  | 0.6 (0.37-0.76)   | 0.38 (0.15-0.57)   | 0.62 (0.37-0.79)  | 0.3 (0-0.55)       |
| Frontal Inf Orb L    | 0.87 (0.8-0.92)  | 0.54 (0.4-0.66)   | 0.75 (0.58-0.85)  | 0.34 (0.11-0.54)   | 0.75 (0.56-0.87)  | 0.45 (0.18-0.66)   |
| Frontal Inf Orb R    | 0.84 (0.75-0.9)  | 0.56 (0.42-0.67)  | 0.76 (0.6-0.86)   | 0.5 (0.29-0.66)    | 0.86 (0.74-0.93)  | 0.3 (0-0.55)       |
| Rolandic Oper L      | 0.79 (0.68-0.87) | 0.48 (0.33-0.61)  | 0.72 (0.54-0.84)  | 0.2 (-0.04-0.42)   | 0.74 (0.55-0.86)  | 0.34 (0.04-0.58)   |
| Rolandic Oper R      | 0.75 (0.61-0.84) | 0.55 (0.41-0.66)  | 0.59 (0.35-0.75)  | 0.21 (-0.03-0.43)  | 0.51 (0.22-0.72)  | 0.24 (-0.06-0.51)  |
| Supp Motor Area L    | 0.69 (0.53-0.8)  | 0.58 (0.45-0.69)  | 0.62 (0.39-0.77)  | 0.26 (0.02-0.47)   | 0.73 (0.52-0.85)  | 0.38 (0.09-0.61)   |
| Supp Motor Area R    | 0.78 (0.66-0.86) | 0.6 (0.47-0.7)    | 0.68 (0.48-0.81)  | 0.41 (0.19-0.59)   | 0.51 (0.22-0.72)  | 0.52 (0.26-0.71)   |
| Olfactory L          | 0.55 (0.35-0.7)  | 0.24 (0.07-0.41)  | 0.54 (0.29-0.72)  | 0.24 (-0.01-0.45)  | 0.61 (0.35-0.78)  | 0.31 (0.01-0.56)   |
| Olfactory R          | 0.67 (0.5-0.79)  | 0.24 (0.06-0.41)  | 0.58 (0.35-0.75)  | 0.47 (0.26-0.64)   | 0.54 (0.25-0.74)  | 0.22 (-0.08-0.49)  |
| Frontal Sup Medial L | 0.61 (0.43-0.75) | 0.51 (0.36-0.63)  | 0.8 (0.67-0.89)   | 0.39 (0.16-0.57)   | 0.68 (0.46-0.83)  | 0.16 (-0.15-0.44)  |
| Frontal Sup Medial R | 0.78 (0.66-0.86) | 0.61 (0.48-0.71)  | 0.8 (0.65-0.88)   | 0.26 (0.02-0.47)   | 0.76 (0.57-0.87)  | 0.31 (0.01-0.56)   |
| Frontal Med Orb L    | 0.4 (0.17-0.59)  | 0.33 (0.15-0.48)  | 0.63 (0.41-0.78)  | 0.3 (0.07-0.51)    | 0.5 (0.2-0.71)    | 0.39 (0.11-0.62)   |
| Frontal Med Orb R    | 0.76 (0.62-0.85) | 0.56 (0.43-0.68)  | 0.63 (0.4-0.78)   | 0.17 (-0.08-0.4)   | 0.71 (0.5-0.84)   | 0.14 (-0.17-0.42)  |
| Rectus L             | 0.62 (0.44-0.75) | 0.34 (0.17-0.49)  | 0.49 (0.23-0.69)  | 0.21 (-0.03-0.43)  | 0.66 (0.42-0.81)  | 0.32 (0.02-0.57)   |
| Rectus R             | 0.7 (0.55-0.81)  | 0.52 (0.38-0.64)  | 0.56 (0.32-0.74)  | 0.16 (-0.09-0.39)  | 0.41 (0.09-0.65)  | 0.09 (-0.21-0.38)  |
| Insula L             | 0.82 (0.72-0.89) | 0.6 (0.46-0.7)    | 0.87 (0.77-0.93)  | 0.3 (0.06-0.5)     | 0.79 (0.63-0.89)  | 0.26 (-0.05-0.52)  |
| Insula R             | 0.84 (0.75-0.9)  | 0.63 (0.5-0.73)   | 0.83 (0.71-0.91)  | 0.33 (0.1-0.53)    | 0.79 (0.63-0.89)  | 0.38 (0.09-0.61)   |
| Cingulum Ant L       | 0.68 (0.52-0.79) | 0.35 (0.18-0.5)   | 0.62 (0.4-0.78)   | 0.32 (0.09-0.52)   | 0.72 (0.51-0.85)  | 0.28 (-0.02-0.54)  |
| Cingulum Ant R       | 0.84 (0.75-0.9)  | 0.63 (0.5-0.73)   | 0.75 (0.58-0.85)  | 0.47 (0.26-0.64)   | 0.68 (0.45-0.82)  | 0.27 (-0.04-0.52)  |
| Cingulum Mid L       | 0.71 (0.56-0.81) | 0.46 (0.3-0.59)   | 0.57 (0.33-0.74)  | 0.27 (0.03-0.48)   | 0.59 (0.32-0.77)  | 0.17 (-0.13-0.45)  |
| Cingulum Mid R       | 0.89 (0.83-0.93) | 0.61 (0.48-0.71)  | 0.7 (0.51-0.83)   | 0.35 (0.11-0.54)   | 0.66 (0.43-0.81)  | 0.31 (0.01-0.56)   |
| Cingulum Post L      | 0.7 (0.55-0.81)  | 0.3 (0.12-0.45)   | 0.65 (0.44-0.79)  | -0.05 (-0.29-0.19) | 0.51 (0.22-0.72)  | 0.43 (0.15-0.65)   |
| Cingulum Post R      | 0.59 (0.4-0.73)  | 0.41 (0.25-0.55)  | 0.64 (0.42-0.79)  | 0.09 (-0.15-0.33)  | 0.62 (0.37-0.79)  | 0.14 (-0.17-0.42)  |
| ParaHippocampal L    | 0.52 (0.31-0.68) | 0.17 (-0.01-0.34) | 0.47 (0.2-0.67)   | 0.1 (-0.15-0.33)   | 0.57 (0.3-0.76)   | 0.19 (-0.11-0.47)  |
| ParaHippocampal R    | 0.74 (0.6-0.83)  | 0.39 (0.22-0.53)  | 0.54 (0.29-0.72)  | 0.27 (0.03-0.48)   | 0.72 (0.52-0.85)  | 0.17 (-0.14-0.45)  |
| Calcarine L          | 0.68 (0.52-0.79) | 0.44 (0.28-0.57)  | 0.65 (0.43-0.79)  | 0.23 (-0.02-0.44)  | 0.75 (0.57-0.87)  | 0.44 (0.17-0.66)   |
| Calcarine R          | 0.68 (0.52-0.79) | 0.31 (0.13-0.46)  | 0.84 (0.73-0.91)  | 0.26 (0.02-0.47)   | 0.64 (0.39-0.8)   | 0.31 (0.01-0.56)   |
| Cuneus L             | 0.58 (0.38-0.72) | 0.36 (0.19-0.5)   | 0.48 (0.22-0.68)  | 0.05 (-0.2-0.28)   | 0.58 (0.31-0.76)  | 0.15 (-0.16-0.43)  |
| Cuneus R             | 0.67 (0.51-0.79) | 0.32 (0.14-0.47)  | 0.58 (0.34-0.75)  | 0.06 (-0.19-0.29)  | 0.36 (0.04-0.62)  | 0.22 (-0.08-0.49)  |
| Lingual L            | 0.74 (0.6-0.83)  | 0.56 (0.42-0.67)  | 0.52 (0.27-0.71)  | 0.45 (0.23-0.62)   | 0.61 (0.36-0.78)  | 0.43 (0.15-0.65)   |
| Lingual R            | 0.82 (0.71-0.88) | 0.68 (0.57-0.77)  | 0.72 (0.54-0.84)  | 0.41 (0.19-0.59)   | 0.78 (0.61-0.88)  | 0.38 (0.09-0.61)   |
| Occipital Sup L      | 0.66 (0.5-0.78)  | 0.42 (0.26-0.56)  | 0.54 (0.29-0.72)  | 0.32 (0.09-0.52)   | 0.74 (0.54-0.86)  | 0.41 (0.12-0.63)   |
| Occipital Sup R      | 0.62 (0.44-0.75) | 0.45 (0.29-0.58)  | 0.44 (0.16-0.65)  | 0.16 (-0.08-0.39)  | 0.61 (0.36-0.78)  | 0.3 (0-0.55)       |
| Occipital Mid L      | 0.74 (0.6-0.83)  | 0.58 (0.45-0.69)  | 0.72 (0.54-0.84)  | 0.35 (0.12-0.55)   | 0.75 (0.56-0.87)  | 0.39 (0.1-0.61)    |
| Occipital Mid R      | 0.67 (0.51-0.79) | 0.58 (0.44-0.69)  | 0.65 (0.43-0.79)  | 0.3 (0.06-0.51)    | 0.75 (0.56-0.87)  | 0.33 (0.03-0.57)   |
| Occipital Inf L      | 0.55 (0.35-0.7)  | 0.47 (0.32-0.6)   | 0.09 (-0.22-0.37) | 0.09 (-0.15-0.33)  | 0.56 (0.28-0.75)  | 0.11 (-0.19-0.4)   |
| Occipital Inf R      | 0.59 (0.41-0.73) | 0.48 (0.32-0.61)  | 0.65 (0.44-0.79)  | 0.25 (0.01-0.46)   | 0.55 (0.26-0.74)  | 0.31 (0.01-0.56)   |
| Fusiform L           | 0.59 (0.4-0.73)  | 0.58 (0.44-0.69)  | 0.31 (0.02-0.56)  | 0.36 (0.12-0.55)   | 0.56 (0.28-0.75)  | 0.45 (0.18-0.66)   |
| Fusiform R           | 0.69 (0.53-0.8)  | 0.5 (0.35-0.63)   | 0.58 (0.34-0.75)  | 0.24 (0-0.46)      | 0.54 (0.26-0.74)  | 0.37 (0.08-0.6)    |
| Postcentral L        | 0.7 (0.55-0.81)  | 0.47 (0.32-0.6)   | 0.68 (0.47-0.81)  | 0.23 (-0.01-0.45)  | 0.69 (0.47-0.83)  | 0.41 (0.13-0.63)   |
| Postcentral R        | 0.8 (0.69-0.87)  | 0.62 (0.5-0.72)   | 0.53 (0.28-0.71)  | 0.4 (0.18-0.59)    | 0.83 (0.69-0.91)  | 0.24 (-0.06-0.51)  |

Table S10: Regional SA correlation within MZ or DZ twin for all timepoints  
(continued)

|                      | $r_{MZ}$         | $r_{DZ}$          | $r_{MZ}$          | $r_{DZ}$          | $r_{MZ}$          | $r_{DZ}$           |
|----------------------|------------------|-------------------|-------------------|-------------------|-------------------|--------------------|
| Parietal Sup L       | 0.48 (0.27-0.65) | 0.4 (0.24-0.54)   | 0.44 (0.16-0.65)  | 0.33 (0.1-0.53)   | 0.38 (0.06-0.63)  | 0.05 (-0.25-0.35)  |
| Parietal Sup R       | 0.86 (0.77-0.91) | 0.68 (0.57-0.77)  | 0.51 (0.25-0.7)   | 0.44 (0.22-0.62)  | 0.3 (-0.03-0.57)  | 0.42 (0.14-0.64)   |
| Parietal Inf L       | 0.66 (0.5-0.78)  | 0.51 (0.36-0.63)  | 0.52 (0.27-0.71)  | 0.32 (0.09-0.53)  | 0.48 (0.18-0.7)   | 0.3 (0-0.55)       |
| Parietal Inf R       | 0.69 (0.53-0.8)  | 0.57 (0.44-0.68)  | 0.51 (0.25-0.7)   | 0.13 (-0.12-0.36) | 0.58 (0.31-0.76)  | 0.36 (0.07-0.6)    |
| SupraMarginal L      | 0.55 (0.35-0.7)  | 0.35 (0.18-0.5)   | 0.6 (0.37-0.76)   | 0.32 (0.09-0.52)  | 0.5 (0.21-0.71)   | 0.5 (0.24-0.7)     |
| SupraMarginal R      | 0.79 (0.68-0.87) | 0.56 (0.42-0.67)  | 0.56 (0.31-0.73)  | 0.32 (0.09-0.52)  | 0.68 (0.45-0.82)  | 0.31 (0.02-0.56)   |
| Angular L            | 0.6 (0.41-0.74)  | 0.32 (0.14-0.47)  | 0.32 (0.03-0.56)  | 0.13 (-0.11-0.36) | 0.36 (0.04-0.62)  | 0.35 (0.06-0.59)   |
| Angular R            | 0.69 (0.54-0.8)  | 0.54 (0.39-0.65)  | 0.63 (0.41-0.78)  | 0.09 (-0.15-0.33) | 0.59 (0.33-0.77)  | 0.19 (-0.11-0.47)  |
| Precuneus L          | 0.86 (0.77-0.91) | 0.52 (0.37-0.64)  | 0.75 (0.58-0.86)  | 0.34 (0.11-0.54)  | 0.69 (0.46-0.83)  | 0.56 (0.31-0.74)   |
| Precuneus R          | 0.88 (0.81-0.92) | 0.73 (0.63-0.8)   | 0.67 (0.47-0.81)  | 0.38 (0.15-0.57)  | 0.67 (0.43-0.82)  | 0.45 (0.18-0.66)   |
| Paracentral Lobule L | 0.6 (0.42-0.74)  | 0.33 (0.16-0.49)  | 0.3 (0-0.55)      | 0.07 (-0.18-0.3)  | 0.44 (0.13-0.67)  | 0.3 (0-0.55)       |
| Paracentral Lobule R | 0.68 (0.52-0.8)  | 0.47 (0.31-0.6)   | 0.41 (0.13-0.63)  | 0.09 (-0.16-0.33) | 0.22 (-0.12-0.51) | -0.17 (-0.45-0.14) |
| Heschl L             | 0.6 (0.41-0.74)  | 0.07 (-0.11-0.25) | 0.25 (-0.05-0.51) | 0.27 (0.03-0.48)  | 0.45 (0.15-0.68)  | 0.26 (-0.04-0.52)  |
| Heschl R             | 0.6 (0.41-0.74)  | 0.31 (0.13-0.46)  | 0.41 (0.13-0.63)  | 0.04 (-0.2-0.28)  | 0.24 (-0.09-0.53) | 0.19 (-0.11-0.47)  |
| Temporal Sup L       | 0.8 (0.69-0.88)  | 0.53 (0.39-0.65)  | 0.76 (0.6-0.86)   | 0.32 (0.09-0.52)  | 0.72 (0.51-0.85)  | 0.35 (0.06-0.59)   |
| Temporal Sup R       | 0.84 (0.74-0.9)  | 0.67 (0.56-0.76)  | 0.75 (0.58-0.85)  | 0.38 (0.15-0.57)  | 0.61 (0.35-0.78)  | 0.35 (0.06-0.59)   |
| Temporal Pole Sup L  | 0.8 (0.69-0.88)  | 0.57 (0.43-0.68)  | 0.56 (0.32-0.74)  | 0.02 (-0.22-0.26) | 0.6 (0.33-0.77)   | 0.23 (-0.08-0.49)  |
| Temporal Pole Sup R  | 0.75 (0.62-0.84) | 0.65 (0.53-0.74)  | 0.54 (0.29-0.72)  | 0.2 (-0.05-0.42)  | 0.64 (0.4-0.8)    | 0.15 (-0.16-0.43)  |
| Temporal Mid L       | 0.76 (0.63-0.85) | 0.58 (0.45-0.69)  | 0.71 (0.52-0.83)  | 0.31 (0.08-0.52)  | 0.61 (0.35-0.78)  | 0.36 (0.06-0.59)   |
| Temporal Mid R       | 0.86 (0.78-0.91) | 0.61 (0.49-0.71)  | 0.74 (0.57-0.85)  | 0.4 (0.17-0.58)   | 0.64 (0.4-0.8)    | 0.29 (-0.02-0.54)  |
| Temporal Pole Mid L  | 0.73 (0.59-0.83) | 0.36 (0.19-0.51)  | 0.73 (0.56-0.85)  | 0.05 (-0.19-0.29) | 0.54 (0.25-0.74)  | 0.13 (-0.18-0.41)  |
| Temporal Pole Mid R  | 0.75 (0.61-0.84) | 0.51 (0.36-0.63)  | 0.59 (0.35-0.75)  | 0.26 (0.02-0.47)  | 0.71 (0.5-0.84)   | 0.12 (-0.19-0.41)  |
| Temporal Inf L       | 0.73 (0.59-0.83) | 0.45 (0.29-0.58)  | 0.72 (0.54-0.84)  | 0.17 (-0.08-0.39) | 0.77 (0.59-0.87)  | 0.19 (-0.12-0.46)  |
| Temporal Inf R       | 0.87 (0.79-0.92) | 0.63 (0.5-0.73)   | 0.68 (0.48-0.81)  | 0.35 (0.12-0.55)  | 0.75 (0.55-0.86)  | 0.45 (0.18-0.66)   |

Table S11: Regional CT correlation within MZ or DZ twin for change between timepoints

|                      | Neonate to 1-year  |                    | 1-year             |                    | 2-year            |                    |
|----------------------|--------------------|--------------------|--------------------|--------------------|-------------------|--------------------|
|                      | $r_{MZ}$           | $r_{DZ}$           | $r_{MZ}$           | $r_{DZ}$           | $r_{MZ}$          | $r_{DZ}$           |
| Precentral L         | 0.33 (-0.06-0.63)  | 0.45 (0.2-0.65)    | 0.02 (-0.41-0.45)  | 0.12 (-0.24-0.46)  | 0.55 (0.17-0.79)  | 0.51 (0.19-0.74)   |
| Precentral R         | 0.56 (0.23-0.78)   | 0.3 (0.01-0.53)    | 0.31 (-0.14-0.66)  | 0.14 (-0.23-0.47)  | 0.82 (0.61-0.92)  | 0.42 (0.07-0.68)   |
| Frontal Sup L        | 0.55 (0.22-0.77)   | 0.45 (0.19-0.65)   | 0.04 (-0.41-0.47)  | 0.13 (-0.24-0.46)  | 0.8 (0.56-0.92)   | 0.58 (0.28-0.78)   |
| Frontal Sup R        | 0.59 (0.27-0.79)   | 0.4 (0.13-0.62)    | 0.4 (-0.04-0.71)   | -0.01 (-0.36-0.35) | 0.77 (0.52-0.9)   | 0.59 (0.3-0.79)    |
| Frontal Sup Orb L    | 0.16 (-0.23-0.51)  | 0.41 (0.14-0.62)   | 0.34 (-0.11-0.67)  | 0.15 (-0.21-0.48)  | 0.43 (0.01-0.72)  | 0.56 (0.25-0.76)   |
| Frontal Sup Orb R    | 0.45 (0.09-0.71)   | 0.27 (-0.01-0.52)  | 0.28 (-0.17-0.64)  | -0.01 (-0.36-0.35) | 0.64 (0.3-0.83)   | 0.29 (-0.08-0.59)  |
| Frontal Mid L        | 0.52 (0.17-0.75)   | 0.44 (0.18-0.65)   | 0.05 (-0.39-0.47)  | 0.26 (-0.11-0.56)  | 0.68 (0.37-0.86)  | 0.52 (0.2-0.74)    |
| Frontal Mid R        | 0.6 (0.29-0.8)     | 0.52 (0.27-0.7)    | 0.36 (-0.08-0.69)  | 0.01 (-0.34-0.37)  | 0.75 (0.47-0.89)  | 0.42 (0.07-0.68)   |
| Frontal Mid Orb L    | 0.53 (0.18-0.76)   | 0.35 (0.07-0.58)   | 0.24 (-0.21-0.61)  | 0.24 (-0.12-0.55)  | 0.31 (-0.13-0.65) | 0.12 (-0.25-0.46)  |
| Frontal Mid Orb R    | 0.6 (0.29-0.8)     | 0.34 (0.06-0.57)   | 0.3 (-0.15-0.65)   | 0.28 (-0.08-0.58)  | 0.56 (0.18-0.79)  | 0.02 (-0.34-0.38)  |
| Frontal Inf Oper L   | 0.52 (0.17-0.75)   | 0.29 (0.01-0.53)   | 0.19 (-0.26-0.57)  | 0.09 (-0.27-0.43)  | 0.76 (0.5-0.89)   | 0.32 (-0.04-0.61)  |
| Frontal Inf Oper R   | 0.61 (0.3-0.8)     | 0.4 (0.14-0.62)    | 0.35 (-0.1-0.68)   | -0.08 (-0.43-0.28) | 0.67 (0.35-0.85)  | 0.52 (0.2-0.74)    |
| Frontal Inf Tri L    | 0.57 (0.24-0.78)   | 0.43 (0.17-0.64)   | -0.05 (-0.47-0.39) | 0.12 (-0.25-0.45)  | 0.8 (0.57-0.91)   | 0.29 (-0.08-0.59)  |
| Frontal Inf Tri R    | 0.53 (0.19-0.76)   | 0.35 (0.07-0.58)   | 0.33 (-0.11-0.67)  | 0.01 (-0.35-0.36)  | 0.85 (0.66-0.93)  | 0.26 (-0.11-0.57)  |
| Frontal Inf Orb L    | 0.54 (0.2-0.76)    | 0.51 (0.27-0.7)    | 0.56 (0.17-0.8)    | 0.17 (-0.19-0.5)   | 0.54 (0.16-0.78)  | 0.13 (-0.25-0.46)  |
| Frontal Inf Orb R    | 0.47 (0.11-0.72)   | 0.37 (0.1-0.59)    | 0.33 (-0.12-0.67)  | 0.1 (-0.27-0.44)   | 0.77 (0.52-0.9)   | 0.18 (-0.19-0.51)  |
| Rolandic Oper L      | 0.66 (0.38-0.83)   | 0.51 (0.27-0.69)   | 0.41 (-0.03-0.71)  | 0.41 (0.06-0.67)   | 0.82 (0.61-0.92)  | 0.47 (0.14-0.71)   |
| Rolandic Oper R      | 0.42 (0.05-0.69)   | 0.43 (0.17-0.64)   | 0.53 (0.13-0.78)   | 0.25 (-0.11-0.56)  | 0.78 (0.53-0.9)   | 0.38 (0.02-0.65)   |
| Supp Motor Area L    | 0.5 (0.15-0.74)    | 0.51 (0.26-0.69)   | 0.17 (-0.29-0.56)  | 0.45 (0.12-0.69)   | 0.77 (0.51-0.9)   | 0.26 (-0.11-0.57)  |
| Supp Motor Area R    | 0.53 (0.19-0.76)   | 0.4 (0.14-0.62)    | 0.33 (-0.12-0.67)  | 0.08 (-0.29-0.42)  | 0.84 (0.65-0.93)  | 0.33 (-0.03-0.62)  |
| Olfactory L          | -0.11 (-0.47-0.28) | 0.09 (-0.2-0.36)   | 0.46 (0.04-0.75)   | 0.03 (-0.33-0.38)  | 0.46 (0.04-0.74)  | 0.25 (-0.12-0.56)  |
| Olfactory R          | 0.73 (0.48-0.87)   | 0.27 (-0.01-0.52)  | 0.14 (-0.31-0.54)  | 0.14 (-0.22-0.47)  | 0.46 (0.04-0.74)  | 0.5 (0.17-0.73)    |
| Frontal Sup Medial L | 0.62 (0.32-0.81)   | 0.47 (0.22-0.67)   | 0.65 (0.31-0.85)   | 0.22 (-0.14-0.54)  | 0.67 (0.35-0.85)  | 0.37 (0.02-0.65)   |
| Frontal Sup Medial R | 0.57 (0.24-0.78)   | 0.56 (0.32-0.73)   | 0.37 (-0.07-0.69)  | 0.34 (-0.02-0.62)  | 0.64 (0.3-0.84)   | 0.41 (0.06-0.67)   |
| Frontal Med Orb L    | 0.48 (0.12-0.73)   | 0.05 (-0.24-0.33)  | 0.25 (-0.2-0.62)   | 0.17 (-0.2-0.49)   | 0.35 (-0.08-0.67) | -0.09 (-0.43-0.28) |
| Frontal Med Orb R    | 0.55 (0.21-0.77)   | 0.36 (0.09-0.59)   | 0.34 (-0.1-0.68)   | 0.32 (-0.03-0.61)  | 0.47 (0.06-0.74)  | 0.15 (-0.23-0.48)  |
| Rectus L             | 0.34 (-0.04-0.64)  | 0.15 (-0.14-0.42)  | 0.33 (-0.12-0.66)  | 0.19 (-0.18-0.51)  | 0.51 (0.11-0.77)  | -0.21 (-0.53-0.17) |
| Rectus R             | 0.48 (0.13-0.73)   | 0.2 (-0.09-0.45)   | 0.42 (-0.02-0.72)  | 0.06 (-0.3-0.41)   | 0.54 (0.15-0.78)  | 0.03 (-0.33-0.39)  |
| Insula L             | 0.51 (0.16-0.75)   | 0.29 (0.01-0.53)   | 0.47 (0.05-0.75)   | 0.28 (-0.08-0.58)  | 0.69 (0.37-0.86)  | 0.6 (0.31-0.79)    |
| Insula R             | 0.57 (0.25-0.78)   | 0.43 (0.17-0.64)   | 0.39 (-0.05-0.7)   | 0.46 (0.12-0.7)    | 0.52 (0.13-0.77)  | 0.36 (-0.01-0.63)  |
| Cingulum Ant L       | 0.17 (-0.23-0.52)  | 0.32 (0.04-0.55)   | -0.25 (-0.62-0.2)  | 0.07 (-0.29-0.41)  | 0.31 (-0.12-0.65) | 0.02 (-0.35-0.37)  |
| Cingulum Ant R       | 0.37 (-0.01-0.66)  | 0.45 (0.19-0.65)   | -0.25 (-0.62-0.2)  | 0.25 (-0.12-0.55)  | 0.58 (0.21-0.8)   | 0.22 (-0.16-0.54)  |
| Cingulum Mid L       | 0.28 (-0.11-0.6)   | 0.19 (-0.1-0.45)   | 0.3 (-0.15-0.65)   | 0.17 (-0.19-0.5)   | 0.67 (0.35-0.85)  | 0.22 (-0.15-0.54)  |
| Cingulum Mid R       | 0.52 (0.17-0.75)   | 0.36 (0.09-0.59)   | -0.17 (-0.56-0.28) | 0.24 (-0.13-0.55)  | 0.52 (0.12-0.77)  | 0.24 (-0.13-0.55)  |
| Cingulum Post L      | 0.16 (-0.23-0.51)  | 0.11 (-0.18-0.38)  | -0.22 (-0.59-0.23) | 0.11 (-0.25-0.45)  | 0.52 (0.13-0.77)  | 0.13 (-0.24-0.47)  |
| Cingulum Post R      | 0.27 (-0.12-0.59)  | -0.08 (-0.35-0.21) | 0.03 (-0.4-0.46)   | 0.05 (-0.31-0.39)  | 0.48 (0.07-0.75)  | 0.09 (-0.28-0.44)  |
| ParaHippocampal L    | 0.36 (-0.02-0.65)  | 0.38 (0.1-0.6)     | 0.02 (-0.42-0.44)  | -0.05 (-0.4-0.31)  | 0.43 (0.01-0.72)  | 0.2 (-0.17-0.53)   |
| ParaHippocampal R    | -0.05 (-0.42-0.34) | -0.01 (-0.29-0.28) | 0.41 (-0.03-0.71)  | -0.29 (-0.59-0.07) | 0.23 (-0.22-0.59) | -0.01 (-0.37-0.35) |
| Calcarine L          | 0.12 (-0.27-0.48)  | 0.37 (0.09-0.59)   | 0.29 (-0.16-0.64)  | 0.17 (-0.19-0.5)   | 0.62 (0.27-0.83)  | 0.22 (-0.15-0.54)  |
| Calcarine R          | 0.45 (0.08-0.71)   | 0.26 (-0.03-0.5)   | 0.42 (-0.02-0.72)  | 0.14 (-0.22-0.47)  | 0.31 (-0.13-0.65) | 0.5 (0.17-0.73)    |
| Cuneus L             | -0.01 (-0.39-0.37) | 0.24 (-0.05-0.49)  | -0.36 (-0.68-0.09) | 0.03 (-0.33-0.38)  | 0.42 (0-0.72)     | 0.25 (-0.12-0.56)  |
| Cuneus R             | 0.34 (-0.05-0.64)  | 0.35 (0.07-0.57)   | 0.44 (0.01-0.73)   | 0 (-0.35-0.36)     | 0.34 (-0.1-0.66)  | 0.26 (-0.11-0.57)  |
| Lingual L            | 0.41 (0.03-0.68)   | 0.33 (0.05-0.56)   | -0.14 (-0.54-0.31) | 0.03 (-0.33-0.38)  | 0.19 (-0.25-0.57) | 0.47 (0.13-0.71)   |
| Lingual R            | 0.42 (0.05-0.69)   | 0.51 (0.27-0.7)    | 0.29 (-0.17-0.64)  | 0.05 (-0.31-0.4)   | 0.48 (0.08-0.75)  | 0.42 (0.07-0.68)   |
| Occipital Sup L      | 0.06 (-0.32-0.43)  | 0.59 (0.37-0.75)   | 0.28 (-0.17-0.64)  | 0.13 (-0.24-0.46)  | 0.37 (-0.07-0.68) | 0.72 (0.49-0.86)   |
| Occipital Sup R      | 0.3 (-0.09-0.61)   | 0.59 (0.37-0.75)   | 0.32 (-0.13-0.66)  | 0.26 (-0.11-0.56)  | 0.4 (-0.03-0.7)   | 0.6 (0.31-0.79)    |
| Occipital Mid L      | 0.38 (-0.01-0.66)  | 0.6 (0.38-0.76)    | 0.41 (-0.03-0.71)  | 0.1 (-0.27-0.44)   | 0.54 (0.15-0.78)  | 0.43 (0.08-0.68)   |
| Occipital Mid R      | 0.15 (-0.24-0.5)   | 0.45 (0.19-0.65)   | 0.18 (-0.27-0.57)  | 0.13 (-0.23-0.47)  | 0.36 (-0.07-0.68) | 0.56 (0.25-0.77)   |
| Occipital Inf L      | 0.33 (-0.06-0.63)  | 0.1 (-0.19-0.38)   | 0.24 (-0.21-0.61)  | 0.08 (-0.28-0.42)  | 0.41 (-0.02-0.71) | 0.28 (-0.09-0.58)  |
| Occipital Inf R      | 0.18 (-0.22-0.52)  | 0.58 (0.35-0.74)   | 0.39 (-0.05-0.7)   | 0.15 (-0.22-0.48)  | 0.31 (-0.13-0.65) | 0.46 (0.12-0.7)    |
| Fusiform L           | 0.51 (0.17-0.75)   | 0.53 (0.29-0.71)   | 0.26 (-0.19-0.62)  | -0.03 (-0.38-0.33) | 0.57 (0.19-0.8)   | 0.36 (0-0.64)      |
| Fusiform R           | 0.34 (-0.04-0.64)  | 0.37 (0.09-0.59)   | 0.41 (-0.02-0.72)  | 0.06 (-0.3-0.4)    | 0.59 (0.22-0.81)  | 0.21 (-0.16-0.53)  |
| Postcentral L        | 0.66 (0.38-0.83)   | 0.36 (0.08-0.58)   | 0.3 (-0.15-0.65)   | 0.2 (-0.17-0.52)   | 0.68 (0.36-0.86)  | 0.58 (0.28-0.78)   |

Table S11: Regional CT correlation within MZ or DZ twin for change between timepoints (*continued*)

|                      | $r_{MZ}$          | $r_{DZ}$          | $r_{MZ}$           | $r_{DZ}$           | $r_{MZ}$          | $r_{DZ}$          |
|----------------------|-------------------|-------------------|--------------------|--------------------|-------------------|-------------------|
| Postcentral R        | 0.51 (0.16-0.74)  | 0.45 (0.19-0.65)  | 0.51 (0.1-0.77)    | 0.1 (-0.26-0.44)   | 0.72 (0.43-0.88)  | 0.49 (0.16-0.72)  |
| Parietal Sup L       | 0.51 (0.16-0.74)  | 0.6 (0.38-0.75)   | 0.46 (0.04-0.75)   | 0.42 (0.08-0.68)   | 0.71 (0.41-0.87)  | 0.52 (0.2-0.74)   |
| Parietal Sup R       | 0.38 (0-0.67)     | 0.55 (0.32-0.72)  | 0.4 (-0.04-0.71)   | 0.29 (-0.07-0.58)  | 0.64 (0.3-0.84)   | 0.6 (0.31-0.79)   |
| Parietal Inf L       | 0.46 (0.1-0.71)   | 0.33 (0.06-0.56)  | 0.36 (-0.08-0.69)  | 0.16 (-0.2-0.49)   | 0.59 (0.22-0.81)  | 0.38 (0.02-0.65)  |
| Parietal Inf R       | 0.12 (-0.28-0.48) | 0.26 (-0.02-0.51) | 0.17 (-0.29-0.56)  | -0.15 (-0.48-0.22) | 0.6 (0.24-0.81)   | 0.2 (-0.17-0.52)  |
| SupraMarginal L      | 0.58 (0.26-0.79)  | 0.26 (-0.03-0.5)  | -0.13 (-0.53-0.32) | 0.02 (-0.34-0.37)  | 0.62 (0.26-0.82)  | 0.03 (-0.34-0.38) |
| SupraMarginal R      | 0.44 (0.08-0.71)  | 0.33 (0.05-0.56)  | -0.14 (-0.54-0.31) | 0.16 (-0.2-0.49)   | 0.8 (0.58-0.92)   | 0.39 (0.04-0.66)  |
| Angular L            | 0.43 (0.06-0.7)   | 0.34 (0.06-0.57)  | 0.29 (-0.17-0.64)  | 0.31 (-0.05-0.6)   | 0.31 (-0.13-0.64) | 0.28 (-0.09-0.58) |
| Angular R            | 0.33 (-0.06-0.63) | 0.39 (0.12-0.61)  | 0.56 (0.18-0.8)    | 0.05 (-0.31-0.4)   | 0.27 (-0.17-0.62) | 0.41 (0.06-0.67)  |
| Precuneus L          | 0.59 (0.27-0.79)  | 0.59 (0.37-0.75)  | 0.33 (-0.11-0.67)  | 0.28 (-0.08-0.58)  | 0.74 (0.46-0.88)  | 0.39 (0.04-0.66)  |
| Precuneus R          | 0.54 (0.2-0.76)   | 0.27 (-0.01-0.52) | 0.58 (0.2-0.81)    | 0.34 (-0.02-0.62)  | 0.75 (0.48-0.89)  | 0.4 (0.05-0.67)   |
| Paracentral Lobule L | 0.16 (-0.23-0.51) | 0.29 (0.01-0.53)  | -0.05 (-0.47-0.39) | 0.2 (-0.16-0.52)   | 0.53 (0.14-0.78)  | 0.11 (-0.26-0.45) |
| Paracentral Lobule R | 0.42 (0.05-0.69)  | 0.34 (0.06-0.57)  | 0.08 (-0.36-0.5)   | 0.14 (-0.23-0.47)  | 0.67 (0.34-0.85)  | 0.17 (-0.21-0.5)  |
| Heschl L             | 0.31 (-0.08-0.62) | 0.2 (-0.09-0.46)  | 0.39 (-0.04-0.71)  | -0.04 (-0.39-0.32) | 0.67 (0.34-0.85)  | 0.53 (0.21-0.75)  |
| Heschl R             | 0.32 (-0.07-0.62) | 0.38 (0.11-0.6)   | 0.4 (-0.04-0.71)   | 0.43 (0.09-0.68)   | 0.68 (0.35-0.85)  | 0.09 (-0.28-0.43) |
| Temporal Sup L       | 0.44 (0.08-0.71)  | 0.47 (0.21-0.66)  | 0 (-0.43-0.43)     | 0.38 (0.03-0.65)   | 0.78 (0.53-0.9)   | 0.28 (-0.09-0.58) |
| Temporal Sup R       | 0.4 (0.02-0.67)   | 0.47 (0.22-0.67)  | 0.14 (-0.31-0.54)  | 0.42 (0.08-0.67)   | 0.78 (0.53-0.9)   | 0.68 (0.42-0.83)  |
| Temporal Pole Sup L  | 0.48 (0.13-0.73)  | 0.1 (-0.19-0.37)  | -0.09 (-0.5-0.36)  | 0.26 (-0.1-0.57)   | 0.64 (0.3-0.84)   | 0.43 (0.08-0.68)  |
| Temporal Pole Sup R  | 0.4 (0.02-0.68)   | 0.12 (-0.17-0.39) | 0.25 (-0.2-0.62)   | 0.26 (-0.11-0.56)  | 0.65 (0.31-0.84)  | 0.52 (0.2-0.74)   |
| Temporal Mid L       | 0.61 (0.3-0.8)    | 0.43 (0.17-0.64)  | 0.36 (-0.09-0.68)  | 0.12 (-0.25-0.45)  | 0.67 (0.35-0.85)  | 0.51 (0.19-0.74)  |
| Temporal Mid R       | 0.44 (0.07-0.7)   | 0.47 (0.21-0.66)  | 0.19 (-0.26-0.58)  | 0 (-0.36-0.35)     | 0.72 (0.42-0.87)  | 0.8 (0.62-0.9)    |
| Temporal Pole Mid L  | 0.43 (0.06-0.7)   | 0.41 (0.15-0.62)  | 0.07 (-0.38-0.49)  | 0.13 (-0.24-0.46)  | 0.32 (-0.12-0.65) | 0.35 (-0.02-0.63) |
| Temporal Pole Mid R  | 0.57 (0.24-0.78)  | 0.27 (-0.01-0.52) | 0.03 (-0.4-0.46)   | 0.2 (-0.17-0.52)   | 0.6 (0.24-0.82)   | 0.46 (0.12-0.7)   |
| Temporal Inf L       | 0.42 (0.05-0.69)  | 0.51 (0.26-0.69)  | 0.48 (0.06-0.76)   | 0.12 (-0.25-0.45)  | 0.44 (0.02-0.73)  | 0.31 (-0.06-0.6)  |
| Temporal Inf R       | 0.6 (0.28-0.8)    | 0.58 (0.36-0.74)  | -0.21 (-0.59-0.25) | 0.3 (-0.06-0.59)   | 0.72 (0.42-0.87)  | 0.61 (0.32-0.8)   |

Table S12: Regional SA correlation within MZ or DZ twin for change between timepoints

|                      | Neonate           |                   | 1-year to 2-year   |                    | Neonate to 2-year |                    |
|----------------------|-------------------|-------------------|--------------------|--------------------|-------------------|--------------------|
|                      | $r_{MZ}$          | $r_{DZ}$          | $r_{MZ}$           | $r_{DZ}$           | $r_{MZ}$          | $r_{DZ}$           |
| Precentral L         | 0.46 (0.1-0.72)   | 0.3 (0.02-0.54)   | 0.07 (-0.37-0.49)  | 0.06 (-0.3-0.41)   | 0.37 (-0.06-0.69) | 0.28 (-0.09-0.58)  |
| Precentral R         | 0.42 (0.05-0.69)  | 0.36 (0.08-0.58)  | 0.38 (-0.06-0.7)   | -0.01 (-0.37-0.34) | 0.29 (-0.15-0.63) | 0.26 (-0.11-0.57)  |
| Frontal Sup L        | 0.7 (0.44-0.86)   | 0.47 (0.21-0.66)  | 0.37 (-0.07-0.69)  | 0.17 (-0.19-0.5)   | 0.58 (0.21-0.8)   | 0.47 (0.14-0.71)   |
| Frontal Sup R        | 0.35 (-0.03-0.65) | 0.41 (0.15-0.62)  | -0.06 (-0.48-0.38) | 0.32 (-0.04-0.6)   | 0.76 (0.5-0.9)    | 0.48 (0.15-0.72)   |
| Frontal Sup Orb L    | 0.72 (0.46-0.86)  | 0.52 (0.28-0.7)   | 0.07 (-0.38-0.48)  | 0.37 (0.02-0.64)   | 0.36 (-0.07-0.68) | 0.32 (-0.05-0.61)  |
| Frontal Sup Orb R    | 0.73 (0.48-0.87)  | 0.51 (0.26-0.69)  | 0.24 (-0.21-0.61)  | 0.1 (-0.26-0.44)   | 0.19 (-0.25-0.57) | 0.32 (-0.05-0.61)  |
| Frontal Mid L        | 0.64 (0.35-0.82)  | 0.42 (0.16-0.63)  | 0.26 (-0.2-0.62)   | 0.48 (0.15-0.71)   | 0.73 (0.44-0.88)  | 0.17 (-0.21-0.5)   |
| Frontal Mid R        | 0.69 (0.43-0.85)  | 0.19 (-0.1-0.45)  | 0.13 (-0.32-0.54)  | -0.22 (-0.53-0.15) | 0.71 (0.41-0.87)  | 0.15 (-0.23-0.48)  |
| Frontal Mid Orb L    | 0.73 (0.49-0.87)  | 0.5 (0.25-0.69)   | 0.12 (-0.33-0.52)  | 0.19 (-0.18-0.51)  | 0.53 (0.15-0.78)  | 0.41 (0.05-0.67)   |
| Frontal Mid Orb R    | 0.66 (0.37-0.83)  | 0.5 (0.26-0.69)   | 0.2 (-0.26-0.58)   | 0.31 (-0.06-0.6)   | 0.33 (-0.11-0.66) | 0.42 (0.06-0.67)   |
| Frontal Inf Oper L   | 0.55 (0.22-0.77)  | 0.48 (0.22-0.67)  | -0.01 (-0.44-0.42) | 0.28 (-0.09-0.57)  | 0.51 (0.11-0.77)  | 0.48 (0.14-0.72)   |
| Frontal Inf Oper R   | 0.59 (0.27-0.79)  | 0.27 (-0.01-0.52) | 0.09 (-0.36-0.5)   | 0 (-0.35-0.35)     | 0.51 (0.11-0.77)  | -0.1 (-0.45-0.27)  |
| Frontal Inf Tri L    | 0.29 (-0.1-0.6)   | 0.27 (-0.02-0.51) | -0.31 (-0.66-0.14) | 0.3 (-0.06-0.59)   | 0.06 (-0.37-0.47) | 0.46 (0.12-0.7)    |
| Frontal Inf Tri R    | 0.65 (0.37-0.83)  | 0.48 (0.23-0.67)  | 0.16 (-0.29-0.55)  | -0.01 (-0.36-0.35) | 0.5 (0.1-0.76)    | 0.26 (-0.11-0.57)  |
| Frontal Inf Orb L    | 0.65 (0.37-0.83)  | 0.65 (0.45-0.79)  | 0.34 (-0.11-0.67)  | 0.09 (-0.27-0.43)  | 0.72 (0.43-0.88)  | 0.48 (0.14-0.71)   |
| Frontal Inf Orb R    | 0.72 (0.46-0.86)  | 0.61 (0.39-0.76)  | 0.27 (-0.19-0.63)  | -0.1 (-0.44-0.27)  | 0.9 (0.78-0.96)   | 0.43 (0.08-0.68)   |
| Rolandic Oper L      | 0.62 (0.31-0.81)  | 0.43 (0.17-0.64)  | 0.5 (0.09-0.77)    | 0.4 (0.05-0.66)    | 0.66 (0.33-0.85)  | 0.49 (0.16-0.72)   |
| Rolandic Oper R      | 0.55 (0.22-0.77)  | 0.48 (0.23-0.67)  | 0.29 (-0.16-0.64)  | 0.01 (-0.35-0.36)  | 0.42 (0.0-0.71)   | 0.16 (-0.21-0.49)  |
| Supp Motor Area L    | 0.56 (0.22-0.77)  | 0.45 (0.19-0.65)  | 0.64 (0.29-0.84)   | 0.34 (-0.02-0.62)  | 0.71 (0.4-0.87)   | 0.47 (0.14-0.71)   |
| Supp Motor Area R    | 0.72 (0.46-0.86)  | 0.53 (0.29-0.71)  | 0.14 (-0.31-0.54)  | 0.42 (0.08-0.67)   | 0.48 (0.07-0.75)  | 0.53 (0.21-0.75)   |
| Olfactory L          | 0.54 (0.2-0.76)   | 0.3 (0.01-0.54)   | 0.43 (0-0.73)      | -0.07 (-0.42-0.29) | 0.54 (0.16-0.79)  | 0.11 (-0.26-0.46)  |
| Olfactory R          | 0.44 (0.07-0.7)   | 0.34 (0.06-0.57)  | -0.2 (-0.58-0.26)  | 0.31 (-0.05-0.6)   | 0.46 (0.05-0.74)  | -0.01 (-0.37-0.35) |
| Frontal Sup Medial L | 0.84 (0.68-0.93)  | 0.58 (0.36-0.74)  | -0.18 (-0.57-0.27) | 0.32 (-0.03-0.61)  | 0.55 (0.17-0.79)  | 0.26 (-0.11-0.57)  |
| Frontal Sup Medial R | 0.83 (0.66-0.92)  | 0.36 (0.08-0.58)  | 0.33 (-0.12-0.67)  | -0.07 (-0.41-0.29) | 0.8 (0.57-0.91)   | 0.49 (0.15-0.72)   |
| Frontal Med Orb L    | 0.47 (0.11-0.72)  | 0.32 (0.04-0.55)  | 0.06 (-0.38-0.48)  | 0.21 (-0.15-0.53)  | 0.39 (-0.04-0.7)  | 0.35 (-0.01-0.63)  |
| Frontal Med Orb R    | 0.58 (0.26-0.79)  | 0.13 (-0.16-0.4)  | -0.05 (-0.47-0.39) | -0.26 (-0.56-0.1)  | 0.64 (0.31-0.84)  | 0.25 (-0.13-0.56)  |
| Rectus L             | 0.61 (0.3-0.8)    | 0.15 (-0.14-0.42) | 0.4 (-0.03-0.71)   | -0.06 (-0.41-0.3)  | 0.41 (-0.02-0.71) | 0.05 (-0.32-0.4)   |
| Rectus R             | 0.53 (0.19-0.76)  | 0.06 (-0.22-0.34) | -0.17 (-0.56-0.28) | -0.26 (-0.57-0.1)  | 0.31 (-0.13-0.65) | 0.31 (-0.05-0.61)  |
| Insula L             | 0.87 (0.72-0.94)  | 0.38 (0.11-0.6)   | 0.28 (-0.17-0.64)  | 0.4 (0.05-0.66)    | 0.79 (0.55-0.91)  | 0.46 (0.11-0.7)    |
| Insula R             | 0.93 (0.85-0.97)  | 0.56 (0.33-0.73)  | 0.44 (0.02-0.74)   | 0.45 (0.12-0.7)    | 0.91 (0.79-0.96)  | 0.63 (0.35-0.81)   |
| Cingulum Ant L       | 0.52 (0.17-0.75)  | 0.45 (0.19-0.65)  | 0.23 (-0.22-0.6)   | 0.2 (-0.16-0.52)   | 0.43 (0.02-0.72)  | 0.02 (-0.34-0.38)  |
| Cingulum Ant R       | 0.66 (0.37-0.83)  | 0.54 (0.31-0.72)  | 0.09 (-0.36-0.5)   | 0.17 (-0.2-0.49)   | 0.67 (0.35-0.85)  | 0.25 (-0.12-0.56)  |
| Cingulum Mid L       | 0.53 (0.19-0.76)  | 0.39 (0.12-0.61)  | 0.27 (-0.19-0.63)  | -0.01 (-0.36-0.35) | 0.55 (0.17-0.79)  | 0.19 (-0.18-0.52)  |
| Cingulum Mid R       | 0.77 (0.56-0.89)  | 0.45 (0.19-0.65)  | 0.07 (-0.37-0.49)  | 0.69 (0.44-0.84)   | 0.46 (0.05-0.74)  | 0.44 (0.09-0.69)   |
| Cingulum Post L      | 0.47 (0.11-0.72)  | 0.09 (-0.2-0.37)  | -0.15 (-0.55-0.3)  | 0.23 (-0.13-0.54)  | 0.31 (-0.13-0.65) | 0.51 (0.19-0.74)   |
| Cingulum Post R      | 0.52 (0.17-0.75)  | 0.22 (-0.07-0.47) | 0.4 (-0.04-0.71)   | 0.17 (-0.2-0.49)   | 0.55 (0.17-0.79)  | 0.18 (-0.2-0.5)    |
| ParaHippocampal L    | 0.24 (-0.15-0.57) | 0.05 (-0.24-0.33) | 0.15 (-0.3-0.55)   | 0.05 (-0.31-0.4)   | 0.53 (0.14-0.78)  | 0.17 (-0.2-0.5)    |
| ParaHippocampal R    | 0.33 (-0.05-0.63) | 0.04 (-0.25-0.32) | 0.32 (-0.13-0.66)  | 0.07 (-0.29-0.41)  | 0.51 (0.11-0.77)  | 0.09 (-0.28-0.43)  |
| Calcarine L          | 0.39 (0.01-0.67)  | 0.33 (0.05-0.56)  | 0.64 (0.29-0.84)   | 0.24 (-0.12-0.55)  | 0.57 (0.2-0.8)    | 0.4 (0.04-0.66)    |
| Calcarine R          | 0.74 (0.5-0.87)   | 0.15 (-0.14-0.42) | 0.16 (-0.29-0.56)  | 0.42 (0.08-0.68)   | 0.45 (0.04-0.73)  | 0.18 (-0.19-0.51)  |
| Cuneus L             | 0.41 (0.04-0.69)  | 0.09 (-0.2-0.36)  | 0.12 (-0.33-0.52)  | -0.04 (-0.39-0.32) | 0.63 (0.28-0.83)  | 0.11 (-0.26-0.45)  |
| Cuneus R             | 0.63 (0.32-0.81)  | 0.11 (-0.18-0.38) | -0.01 (-0.44-0.43) | 0.17 (-0.2-0.49)   | 0.29 (-0.15-0.63) | 0.15 (-0.22-0.48)  |
| Lingual L            | 0.65 (0.37-0.83)  | 0.55 (0.32-0.72)  | -0.41 (-0.71-0.03) | 0.21 (-0.15-0.53)  | 0.56 (0.18-0.79)  | 0.42 (0.07-0.68)   |
| Lingual R            | 0.71 (0.46-0.86)  | 0.38 (0.11-0.6)   | 0.26 (-0.2-0.62)   | -0.04 (-0.39-0.32) | 0.74 (0.46-0.89)  | 0.23 (-0.14-0.55)  |
| Occipital Sup L      | 0.43 (0.06-0.7)   | 0.3 (0.02-0.54)   | 0.19 (-0.26-0.57)  | -0.08 (-0.42-0.28) | 0.63 (0.28-0.83)  | 0.37 (0.01-0.65)   |
| Occipital Sup R      | 0.56 (0.23-0.77)  | 0.16 (-0.13-0.43) | -0.25 (-0.61-0.21) | 0.18 (-0.19-0.5)   | 0.53 (0.14-0.78)  | 0.12 (-0.25-0.46)  |
| Occipital Mid L      | 0.7 (0.44-0.86)   | 0.51 (0.26-0.69)  | 0.29 (-0.17-0.64)  | 0.29 (-0.07-0.58)  | 0.59 (0.22-0.81)  | 0.37 (0.02-0.65)   |
| Occipital Mid R      | 0.57 (0.25-0.78)  | 0.38 (0.11-0.6)   | 0.13 (-0.32-0.53)  | 0.29 (-0.07-0.58)  | 0.78 (0.53-0.9)   | 0.3 (-0.06-0.6)    |
| Occipital Inf L      | 0.2 (-0.19-0.54)  | 0.02 (-0.26-0.31) | -0.22 (-0.59-0.24) | -0.17 (-0.49-0.2)  | 0.61 (0.25-0.82)  | 0.37 (0.01-0.64)   |
| Occipital Inf R      | 0.63 (0.33-0.81)  | 0.14 (-0.15-0.41) | 0.13 (-0.32-0.53)  | 0.29 (-0.07-0.59)  | 0.29 (-0.15-0.63) | 0.36 (0-0.64)      |
| Fusiform L           | 0.28 (-0.11-0.6)  | 0.24 (-0.05-0.49) | -0.01 (-0.44-0.43) | 0.04 (-0.32-0.39)  | 0.64 (0.29-0.83)  | 0.46 (0.12-0.7)    |
| Fusiform R           | 0.58 (0.25-0.78)  | 0.25 (-0.03-0.5)  | 0.32 (-0.13-0.66)  | -0.11 (-0.45-0.25) | 0.63 (0.29-0.83)  | 0.34 (-0.02-0.62)  |
| Postcentral L        | 0.77 (0.56-0.89)  | 0.42 (0.15-0.63)  | 0.06 (-0.38-0.48)  | -0.02 (-0.38-0.33) | 0.61 (0.26-0.82)  | 0.55 (0.23-0.76)   |

Table S12: Regional SA correlation within MZ or DZ twin for change between timepoints (*continued*)

|                      | $r_{MZ}$          | $r_{DZ}$          | $r_{MZ}$           | $r_{DZ}$           | $r_{MZ}$           | $r_{DZ}$          |
|----------------------|-------------------|-------------------|--------------------|--------------------|--------------------|-------------------|
| Postcentral R        | 0.45 (0.08-0.71)  | 0.55 (0.31-0.72)  | -0.2 (-0.58-0.25)  | 0.18 (-0.18-0.5)   | 0.85 (0.67-0.94)   | 0.18 (-0.2-0.5)   |
| Parietal Sup L       | 0.52 (0.17-0.75)  | 0.42 (0.15-0.63)  | -0.03 (-0.46-0.4)  | -0.1 (-0.44-0.26)  | -0.02 (-0.43-0.41) | 0.18 (-0.19-0.51) |
| Parietal Sup R       | 0.25 (-0.15-0.57) | 0.51 (0.26-0.69)  | 0.24 (-0.22-0.61)  | -0.06 (-0.41-0.3)  | -0.05 (-0.46-0.38) | 0.36 (-0.01-0.63) |
| Parietal Inf L       | 0.49 (0.13-0.73)  | 0.46 (0.2-0.66)   | -0.08 (-0.5-0.36)  | 0.05 (-0.31-0.39)  | 0.43 (0.01-0.72)   | 0.16 (-0.21-0.49) |
| Parietal Inf R       | 0.45 (0.08-0.71)  | 0.14 (-0.15-0.41) | 0.59 (0.22-0.82)   | 0.4 (0.06-0.66)    | 0.5 (0.1-0.76)     | 0.44 (0.1-0.69)   |
| SupraMarginal L      | 0.59 (0.27-0.79)  | 0.51 (0.27-0.7)   | 0.09 (-0.35-0.51)  | 0.33 (-0.03-0.61)  | 0.43 (0.01-0.72)   | 0.59 (0.3-0.79)   |
| SupraMarginal R      | 0.6 (0.29-0.8)    | 0.33 (0.05-0.56)  | 0.3 (-0.16-0.64)   | 0.39 (0.04-0.66)   | 0.87 (0.72-0.95)   | 0.31 (-0.05-0.6)  |
| Angular L            | 0.25 (-0.14-0.57) | 0.22 (-0.07-0.47) | -0.02 (-0.45-0.42) | 0.08 (-0.28-0.42)  | 0.23 (-0.21-0.6)   | 0.53 (0.22-0.75)  |
| Angular R            | 0.48 (0.13-0.73)  | 0.09 (-0.2-0.37)  | 0.27 (-0.18-0.63)  | 0.02 (-0.34-0.37)  | 0.49 (0.09-0.76)   | 0.31 (-0.05-0.61) |
| Precuneus L          | 0.67 (0.39-0.84)  | 0.33 (0.05-0.56)  | 0.21 (-0.25-0.59)  | 0.28 (-0.08-0.58)  | 0.57 (0.19-0.8)    | 0.74 (0.52-0.87)  |
| Precuneus R          | 0.76 (0.54-0.89)  | 0.39 (0.12-0.61)  | 0.24 (-0.22-0.61)  | 0.46 (0.13-0.7)    | 0.73 (0.44-0.88)   | 0.39 (0.03-0.66)  |
| Paracentral Lobule L | 0.32 (-0.06-0.63) | 0.25 (-0.04-0.5)  | 0.17 (-0.29-0.56)  | 0.05 (-0.31-0.4)   | 0.02 (-0.41-0.43)  | 0.53 (0.21-0.75)  |
| Paracentral Lobule R | 0.47 (0.11-0.72)  | 0.14 (-0.15-0.41) | 0.04 (-0.4-0.46)   | 0.16 (-0.21-0.48)  | 0.15 (-0.29-0.54)  | -0.3 (-0.59-0.07) |
| Heschl L             | 0.17 (-0.22-0.52) | 0.4 (0.13-0.61)   | 0.29 (-0.17-0.64)  | 0.12 (-0.25-0.45)  | 0.41 (-0.01-0.71)  | 0.29 (-0.08-0.59) |
| Heschl R             | 0.52 (0.17-0.75)  | 0.24 (-0.05-0.49) | -0.29 (-0.64-0.16) | 0.13 (-0.24-0.46)  | 0.3 (-0.14-0.64)   | 0.26 (-0.11-0.57) |
| Temporal Sup L       | 0.73 (0.48-0.87)  | 0.61 (0.39-0.76)  | 0.42 (-0.01-0.72)  | 0.48 (0.15-0.71)   | 0.69 (0.38-0.86)   | 0.42 (0.07-0.68)  |
| Temporal Sup R       | 0.79 (0.58-0.9)   | 0.53 (0.29-0.71)  | 0.26 (-0.2-0.62)   | 0.33 (-0.02-0.62)  | 0.75 (0.48-0.89)   | 0.46 (0.12-0.7)   |
| Temporal Pole Sup L  | 0.41 (0.04-0.68)  | 0.03 (-0.26-0.31) | 0.47 (0.05-0.75)   | -0.04 (-0.39-0.32) | 0.44 (0.02-0.73)   | 0.13 (-0.24-0.47) |
| Temporal Pole Sup R  | 0.53 (0.19-0.76)  | 0.16 (-0.13-0.42) | 0.34 (-0.1-0.68)   | 0.01 (-0.35-0.36)  | 0.53 (0.14-0.78)   | 0.35 (-0.02-0.63) |
| Temporal Mid L       | 0.78 (0.57-0.89)  | 0.51 (0.27-0.7)   | 0.57 (0.18-0.8)    | 0.31 (-0.05-0.6)   | 0.65 (0.31-0.84)   | 0.34 (-0.02-0.62) |
| Temporal Mid R       | 0.71 (0.45-0.86)  | 0.42 (0.15-0.63)  | 0.47 (0.05-0.75)   | 0.38 (0.03-0.65)   | 0.66 (0.33-0.84)   | 0.17 (-0.21-0.5)  |
| Temporal Pole Mid L  | 0.5 (0.14-0.74)   | 0.11 (-0.18-0.38) | 0.41 (-0.02-0.72)  | 0.14 (-0.23-0.47)  | 0.3 (-0.14-0.64)   | 0.27 (-0.1-0.57)  |
| Temporal Pole Mid R  | 0.65 (0.36-0.83)  | 0.33 (0.05-0.56)  | 0.44 (0.02-0.74)   | 0.2 (-0.17-0.52)   | 0.7 (0.4-0.87)     | 0.24 (-0.13-0.55) |
| Temporal Inf L       | 0.59 (0.27-0.79)  | 0.31 (0.03-0.55)  | 0.66 (0.32-0.85)   | 0.46 (0.13-0.7)    | 0.59 (0.22-0.81)   | 0.14 (-0.23-0.48) |
| Temporal Inf R       | 0.56 (0.23-0.78)  | 0.43 (0.17-0.64)  | 0.46 (0.04-0.74)   | 0.09 (-0.27-0.43)  | 0.76 (0.51-0.9)    | 0.46 (0.12-0.7)   |
